# Supplementary material for: The interplay of covalency, cooperativity, and coupling strength in governing C–H bond activation in Ni 2 E 2 (E = O, S, Se, Te) complexes
Source: Royal Society of Chemistry journal article supplement (doi:10.1039/d4sc02882a), 2024-01-01
Supplement: d4sc02882a1.pdf [file d4sc02882a1.pdf]

Supporting Information on

## **The Interplay of Covalency, Cooperativity, and Coupling Strength in Governing C–H Bond Activation in Ni<sub>2</sub>E<sub>2</sub> (E = O, S, Se, Te) Complexes**

Sunita Sharma,<sup>[a]</sup> Bhawana Pandey,<sup>[a]</sup> and Gopalan Rajaraman\*<sup>[a]</sup>

[a] Department of Chemistry, Indian Institute of Technology Bombay, Mumbai-400076, India. E-mail: rajaraman@chem.iitb.ac.in

## Table of Contents

|     |                                                                                                                                                                                                                                                                                                           |          |
|-----|-----------------------------------------------------------------------------------------------------------------------------------------------------------------------------------------------------------------------------------------------------------------------------------------------------------|----------|
| 1.  | The proposed mechanism for the reactivity of complexes <b>1-4</b> towards the DHA molecule.                                                                                                                                                                                                               | S3       |
| 2.  | The optimized structures and their corresponding spin density plot for complexes <sup>1</sup> <b>1-4</b> <sub>(t,t)</sub> ground state reactant                                                                                                                                                           | S4       |
| 3.  | The optimized structures and their corresponding spin density plot of the ground state of first hydrogen abstraction transition state ( <b>ts1</b> ) for complexes <b>1-4</b>                                                                                                                             | S5       |
| 4.  | The optimized structures and their corresponding spin density plot of the ground state of intermediate species ( <b>Int1</b> ) for complexes <b>1-4</b> .                                                                                                                                                 | S6       |
| 5.  | The optimized geometries and spin density plots of all possible spin states of reactant, transition states, and intermediates for complex <b>1</b>                                                                                                                                                        | S7-S9    |
| 6.  | The optimized geometries and spin density plots of all possible spin states of reactant, transition states, and intermediates for complex <b>2</b>                                                                                                                                                        | S10-S12  |
| 7.  | The optimized geometries and spin density plots of all possible spin states of reactant, transition states, intermediates, and product complex for complex <b>3</b>                                                                                                                                       | S13-S17  |
| 8.  | The optimized geometries and spin density plots of all possible spin states of reactant, transition states, and intermediates for complex <b>4</b>                                                                                                                                                        | S18-S20  |
| 9.  | Optimized geometries of bis(μ-oxo) {Ni <sub>2</sub> (III)E <sub>2</sub> } type complexes, and the table for DLPNO-CCSD(T) calculated values for complex <b>1</b>                                                                                                                                          | S21      |
| 10. | The spin configurations are computed for <b>1-4</b> , along with its energetics. The value in the parenthesis is computed using DLPNO-CCSD(T) methods, selected structural parameters reported for structurally analogue complexes (X-ray) along with DFT computed ground state geometries for <b>1-4</b> | S22      |
| 11. | AIM plots for complexes <sup>1</sup> <b>1-4</b> <sub>(t,t)</sub>                                                                                                                                                                                                                                          | S23-S24  |
| 12. | Computed NBO plots for complexes <sup>1</sup> <b>1-4</b> <sub>(t,t)</sub>                                                                                                                                                                                                                                 | S25-S26  |
| 13. | WBI values for the ground state of complexes <sup>1</sup> <b>1-4</b> <sub>(t,t)</sub>                                                                                                                                                                                                                     | S27      |
| 14. | Second-order perturbation analysis of complexes <sup>1</sup> <b>1-4</b> <sub>(t,t)</sub>                                                                                                                                                                                                                  | S27      |
| 15. | Computed eigenvalue plot of complexes <sup>1</sup> <b>1-4</b> <sub>(t,t)</sub>                                                                                                                                                                                                                            | S28-S31  |
| 16. | SA-CASSCF orbitals plot for complex <sup>1</sup> <b>1-4</b> <sub>(t,t)</sub>                                                                                                                                                                                                                              | S32-S36  |
| 17. | SA-CASSCF orbitals configuration tables for the complexes <sup>1</sup> <b>1-4</b> <sub>(t,t)</sub>                                                                                                                                                                                                        | S36      |
| 18. | Overlap integral for the ground state of complexes <sup>1</sup> <b>1-4</b> <sub>(t,t)</sub>                                                                                                                                                                                                               | S37      |
| 19. | Previous literature data table for different reported chalcogenide complexes                                                                                                                                                                                                                              | S37      |
| 20. | Interaction energies (in kJ/mol), ΔE <sub>steric</sub> and deformation energy for lowest and first excited state of <b>ts1</b> for all complexes <b>1-4</b>                                                                                                                                               | S37      |
| 21. | The symmetry measures of all four complexes (1-4) showed a minute deviations from D2h, ranging between 0.11-0.22 (plotted by Chemcraft software).                                                                                                                                                         | S38      |
| 22. | The qualitative molecular orbital diagram of complexes <sup>1</sup> <b>1-4</b> <sub>(t,t)</sub>                                                                                                                                                                                                           | S39-S41  |
| 23. | Electronic absorption spectra of ground state <sup>1</sup> R <sub>(t,t)</sub> (for all four complexes <b>1-4</b> )                                                                                                                                                                                        | S42      |
| 24. | Computed potential energy surface for the C-H bond activation by complexes (a) <b>1</b> , (b) <b>2</b> , (c) <b>3</b> and (d) <b>4</b> (kJ/mol)                                                                                                                                                           | S43      |
| 25. | IRC plots for the reactant and first hydrogen abstraction transition state for complex <b>3</b>                                                                                                                                                                                                           | S44-S45  |
| 26. | Spin natural orbitals and their occupations for complexes <sup>1</sup> <b>1-4</b> <sub>(t,t)</sub>                                                                                                                                                                                                        | S46-S49  |
| 27. | Computed eigenvalue plot for the first hydrogen abstraction transition state ( <b>ts1</b> ) of complexes <b>1-4</b>                                                                                                                                                                                       | S50-S53  |
| 28. | Table for Non-adiabatic coupling parameters for the ground state of first hydrogen abstraction transition state of all four complexes <b>1-4</b> .                                                                                                                                                        | S53      |
| 29. | Electron shift or orbital evolution diagrams of <b>ts1</b> for complexes <b>1-3</b> and table for <i>J</i> values computed for single monomer core Ni(2)-E(2) core.                                                                                                                                       | S54      |
| 30. | Optimized geometries of substituted reactant ( <sup>1</sup> R <sub>t,t</sub> ) and first hydrogen abstraction transition state ( <sup>5</sup> TS <sub>t,t</sub> ) species of complex <b>3</b>                                                                                                             | S55      |
| 31. | The magneto structure correlation for the substituted geometries of the complex <b>3</b> .                                                                                                                                                                                                                | S56      |
| 32. | <i>J</i> value with barrier height of first hydrogen abstraction transition state (TS1) by substituted geometries of complex <b>3</b> .                                                                                                                                                                   | S56      |
| 33. | Computed spin densities, Mulliken charges and bond parameters of complex <b>1</b> for all possible spin states of reactants ( <b>R</b> ), transition state and intermediates                                                                                                                              | S57-S61  |
| 34. | Computed spin densities, Mulliken charges and bond parameters of complex <b>2</b> for all possible spin states of reactants ( <b>R</b> ), transition state and intermediates.                                                                                                                             | S62-S66  |
| 35. | Computed spin densities, Mulliken charges and bond parameters of complex <b>3</b> for all possible spin states of reactants ( <b>R</b> ), transition state, intermediates, and product complex.                                                                                                           | S66-S74  |
| 36. | Computed spin densities, Mulliken charges and bond parameters of complex <b>4</b> for all possible spin states of reactants ( <b>R</b> ), transition state and intermediates.                                                                                                                             | S74-S78  |
| 37. | Optimized geometries of ground state reactant, transition state, intermediate, and products of complexes <b>1-4</b> .                                                                                                                                                                                     | S79-S125 |
| 38. | References                                                                                                                                                                                                                                                                                                | S126     |

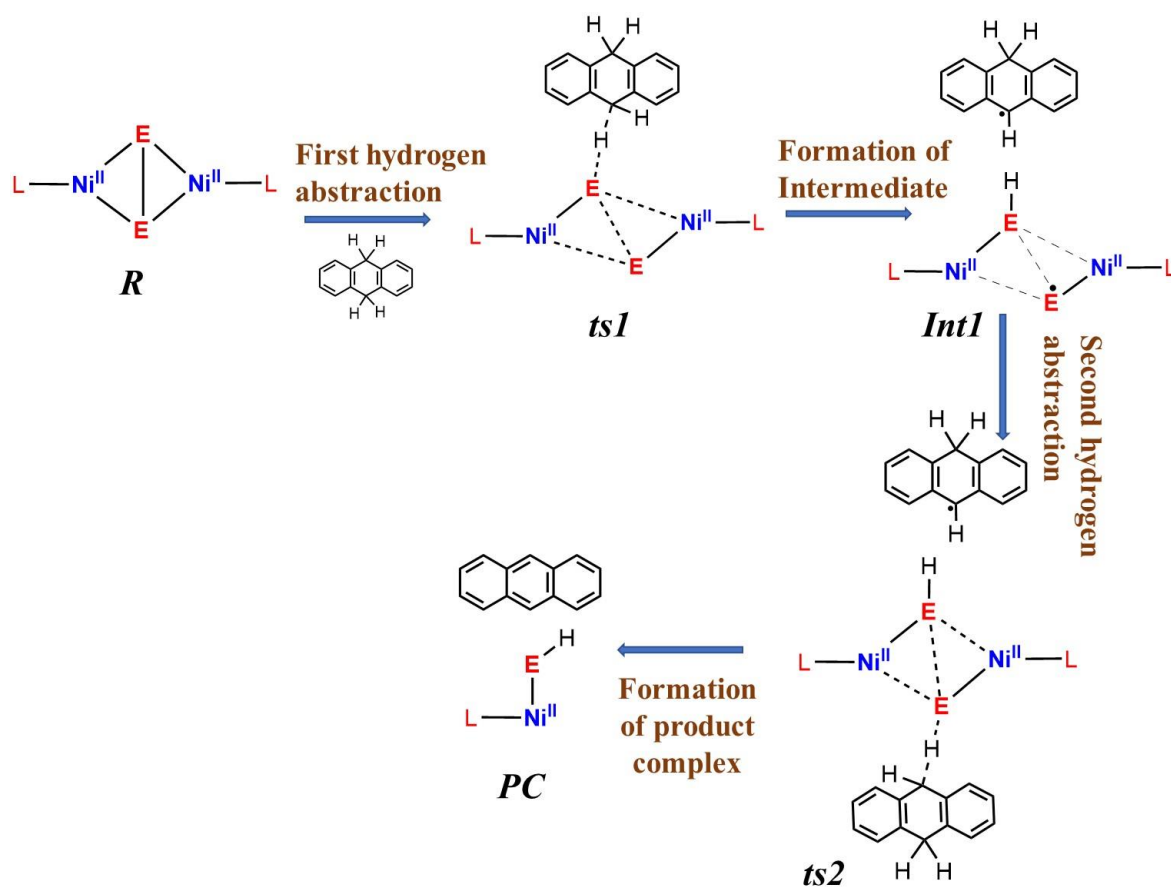

**Scheme 1.** The proposed mechanism for the reactivity of complexes **1-4** towards the DHA molecule.

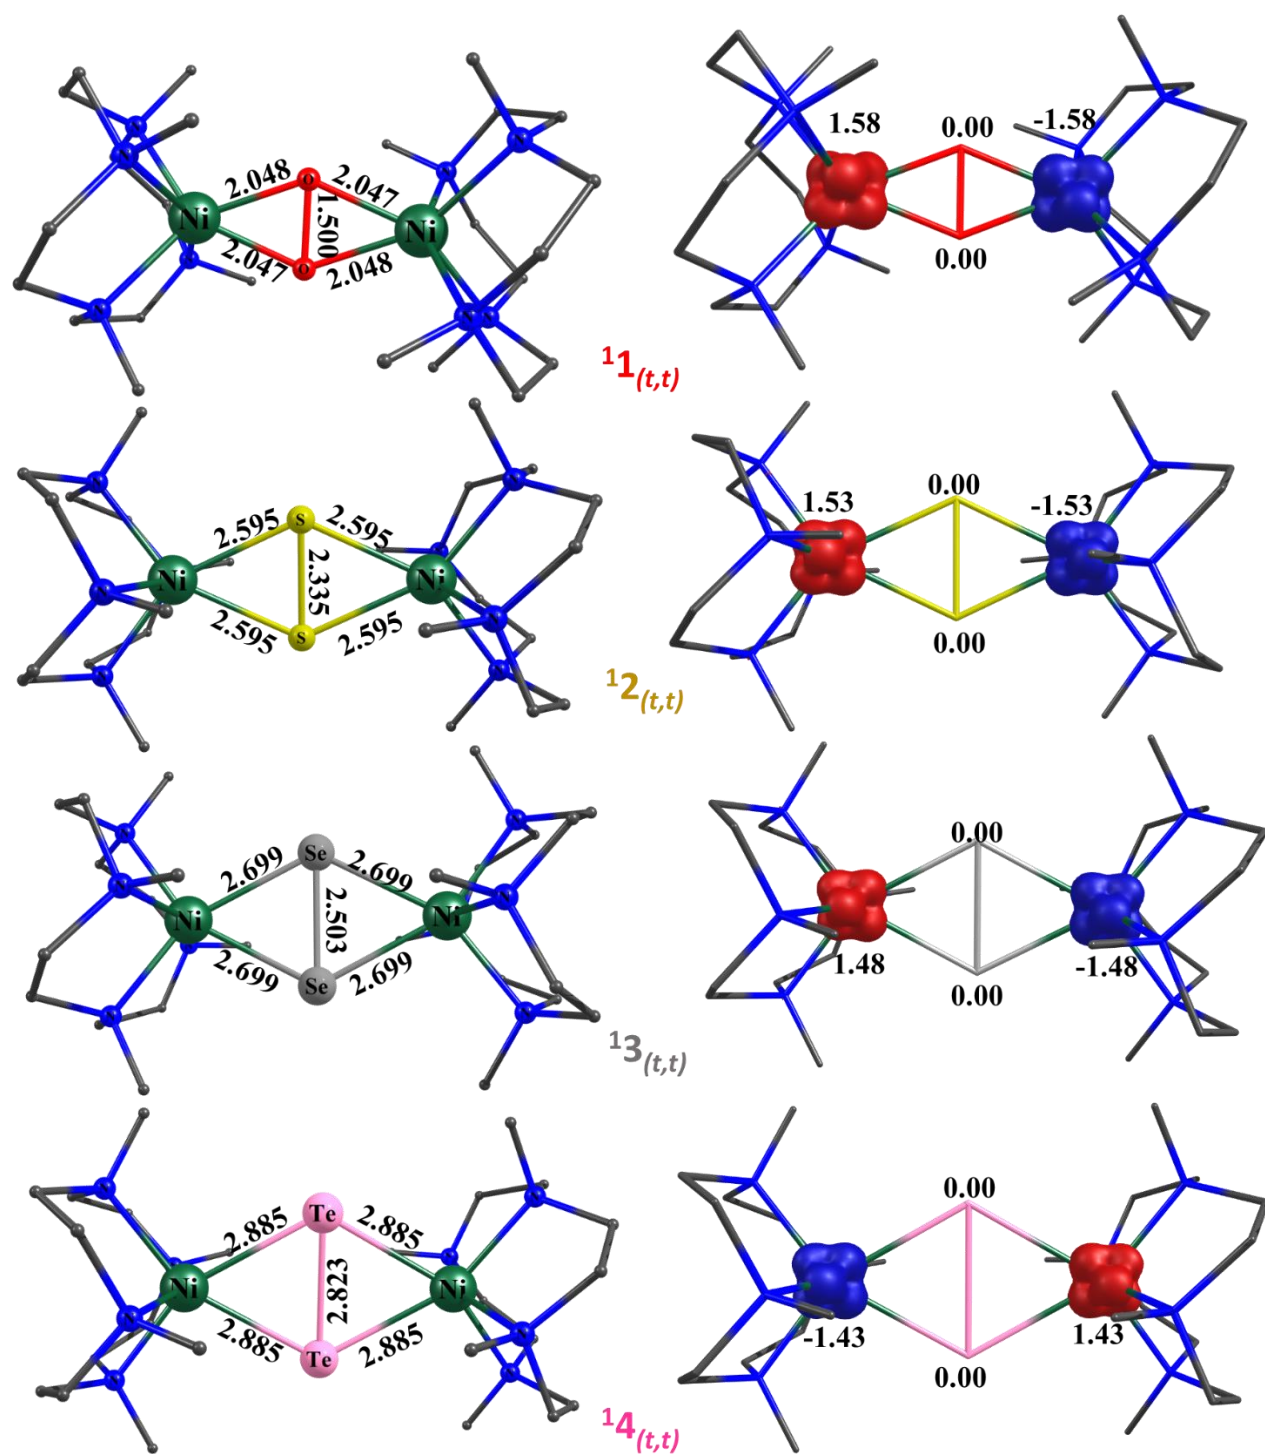

**Figure S1.** The optimized structures and its corresponding spin density plot for complexes  $11_{(t,t)}$ - $14_{(t,t)}$  ground state reactant.

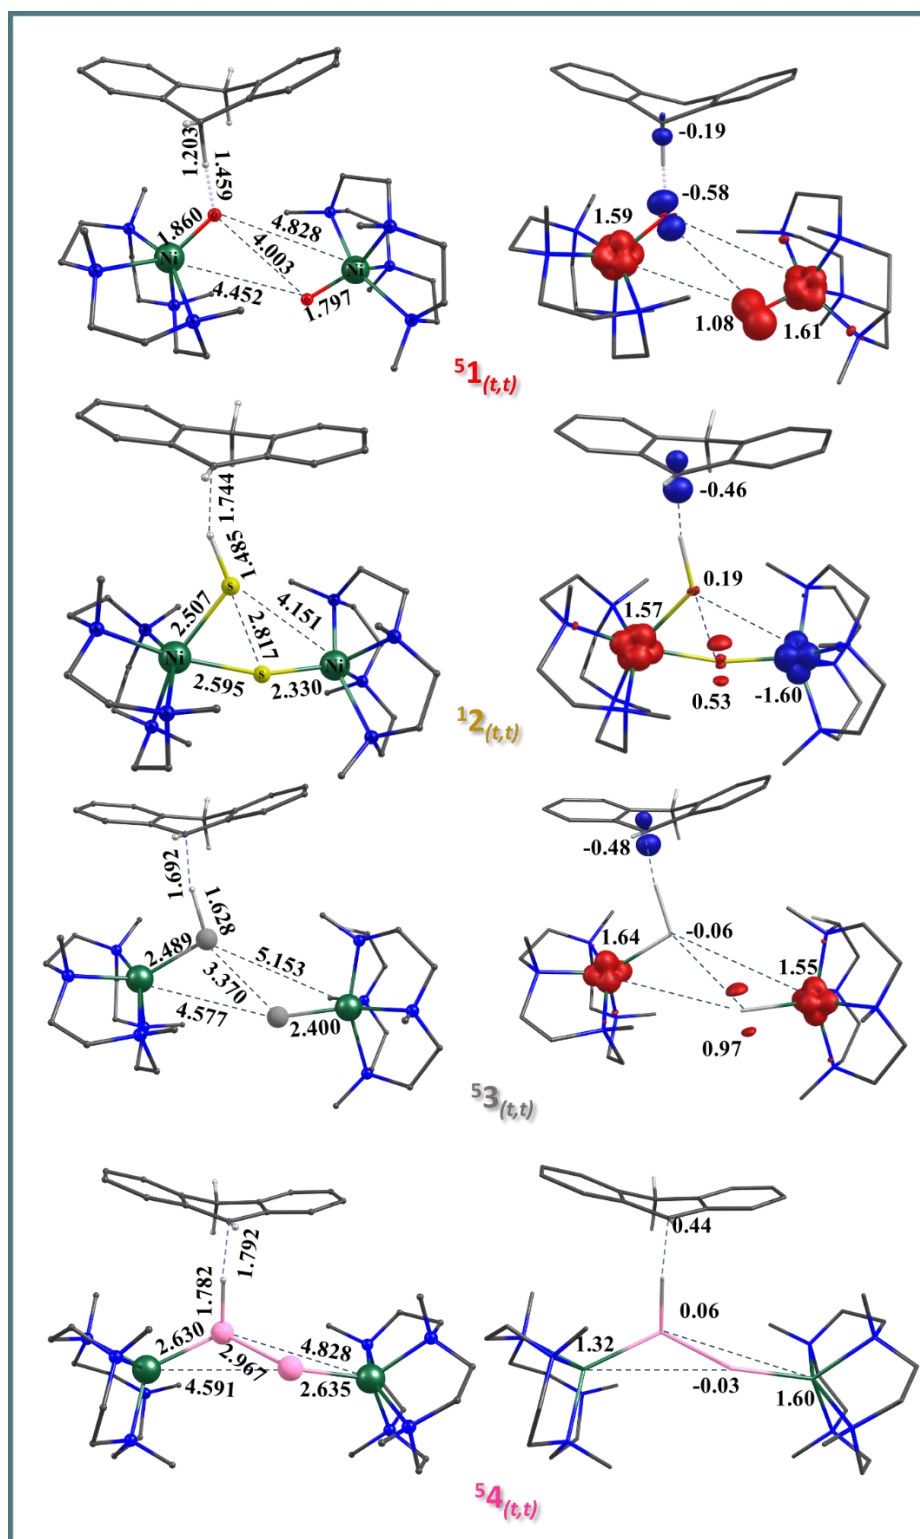

**Figure S2.** The optimized structures and its corresponding spin density plot of the ground state of first hydrogen abstraction transition state (**ts1**) for complexes **1-4**.

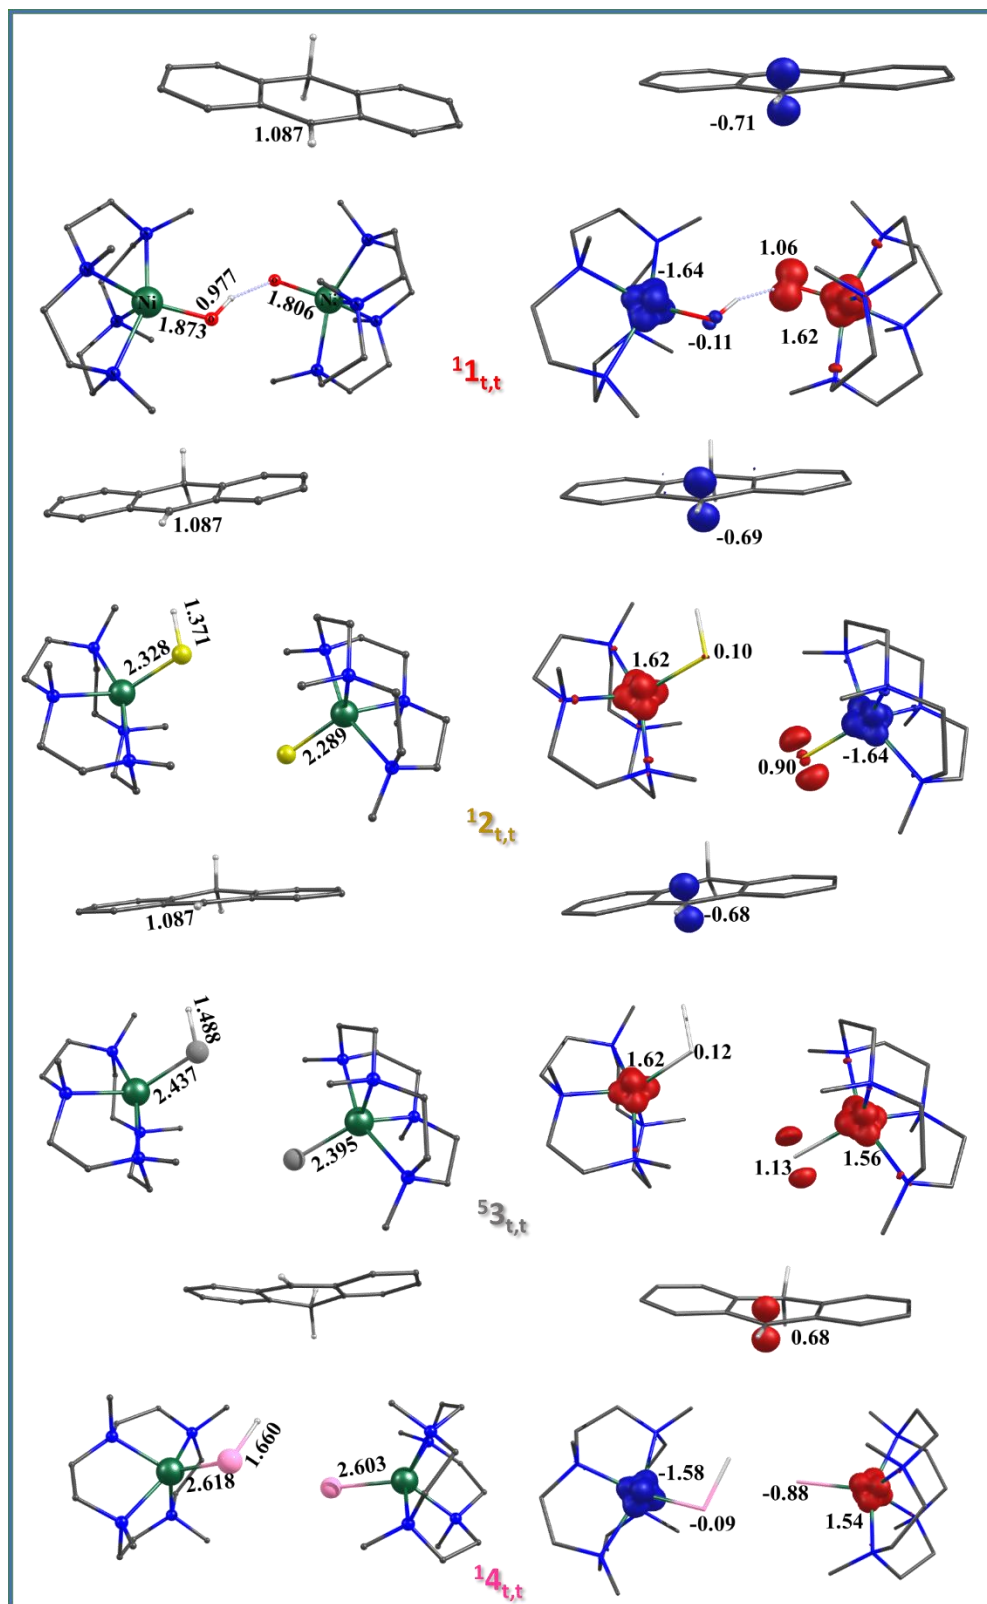

**Figure S3.** The optimized structures and its corresponding spin density plot of the ground state of intermediate species (**Int1**) for complexes **1-4**.

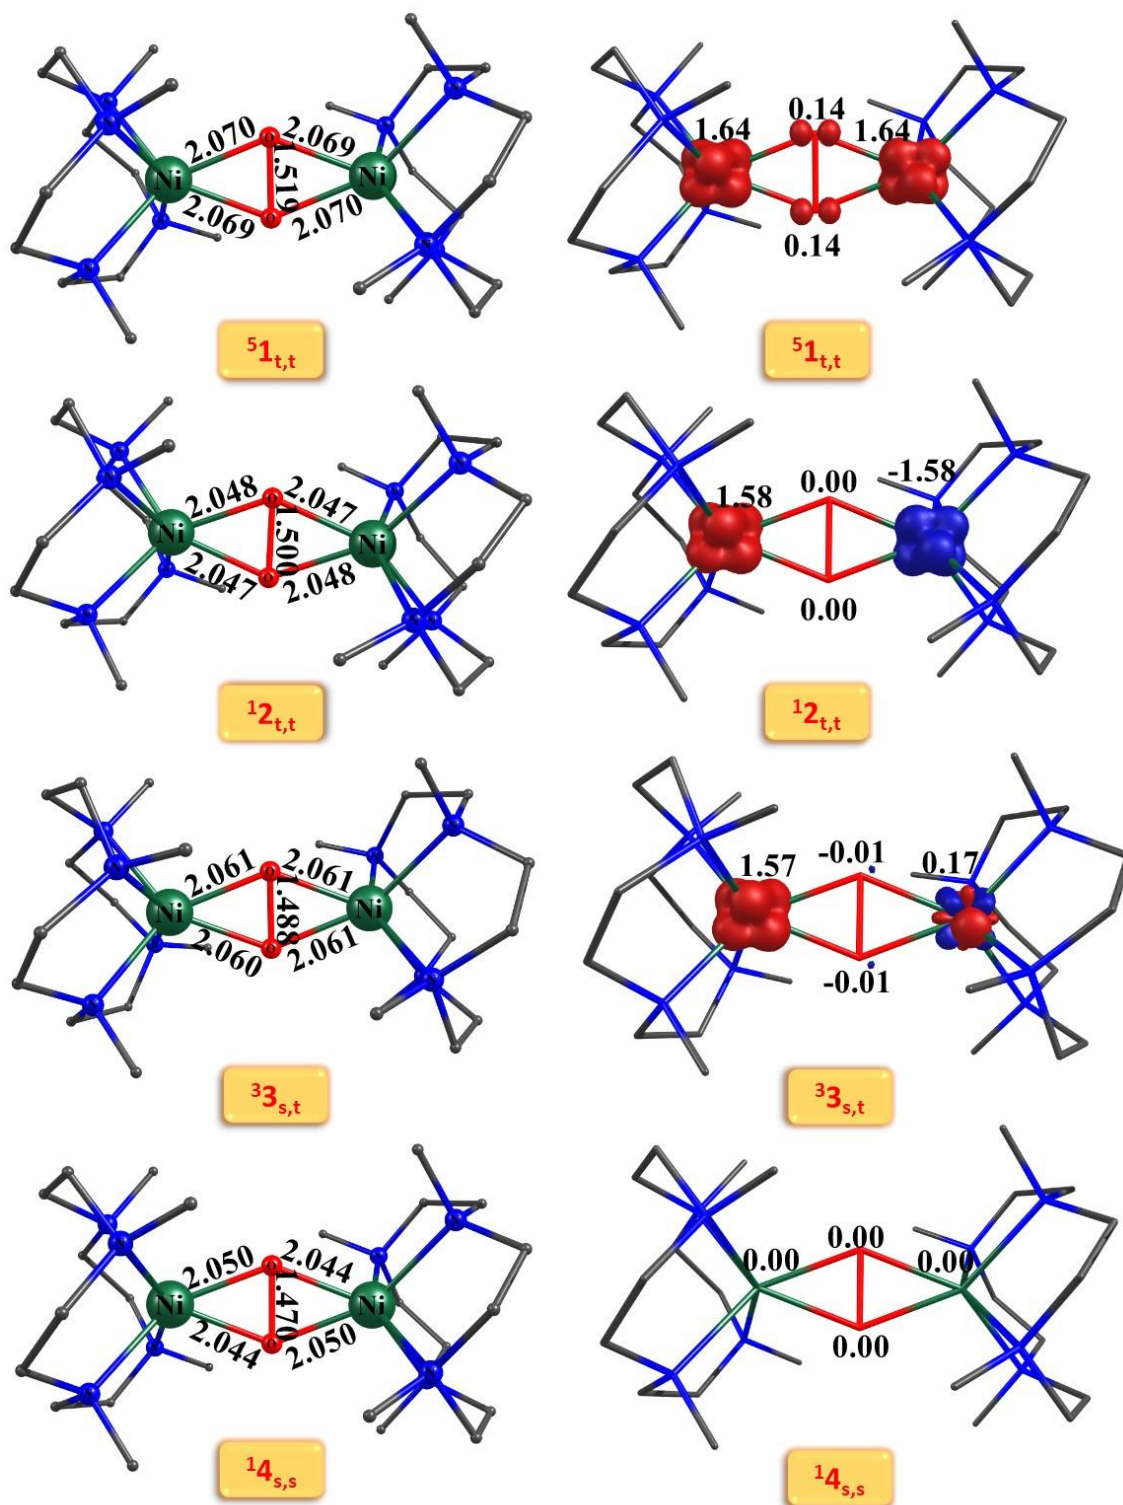

**Figure S4.** The optimized structures of reactant **1** and its corresponding spin density plot. Here all the hydrogen atoms are omitted for clarity.

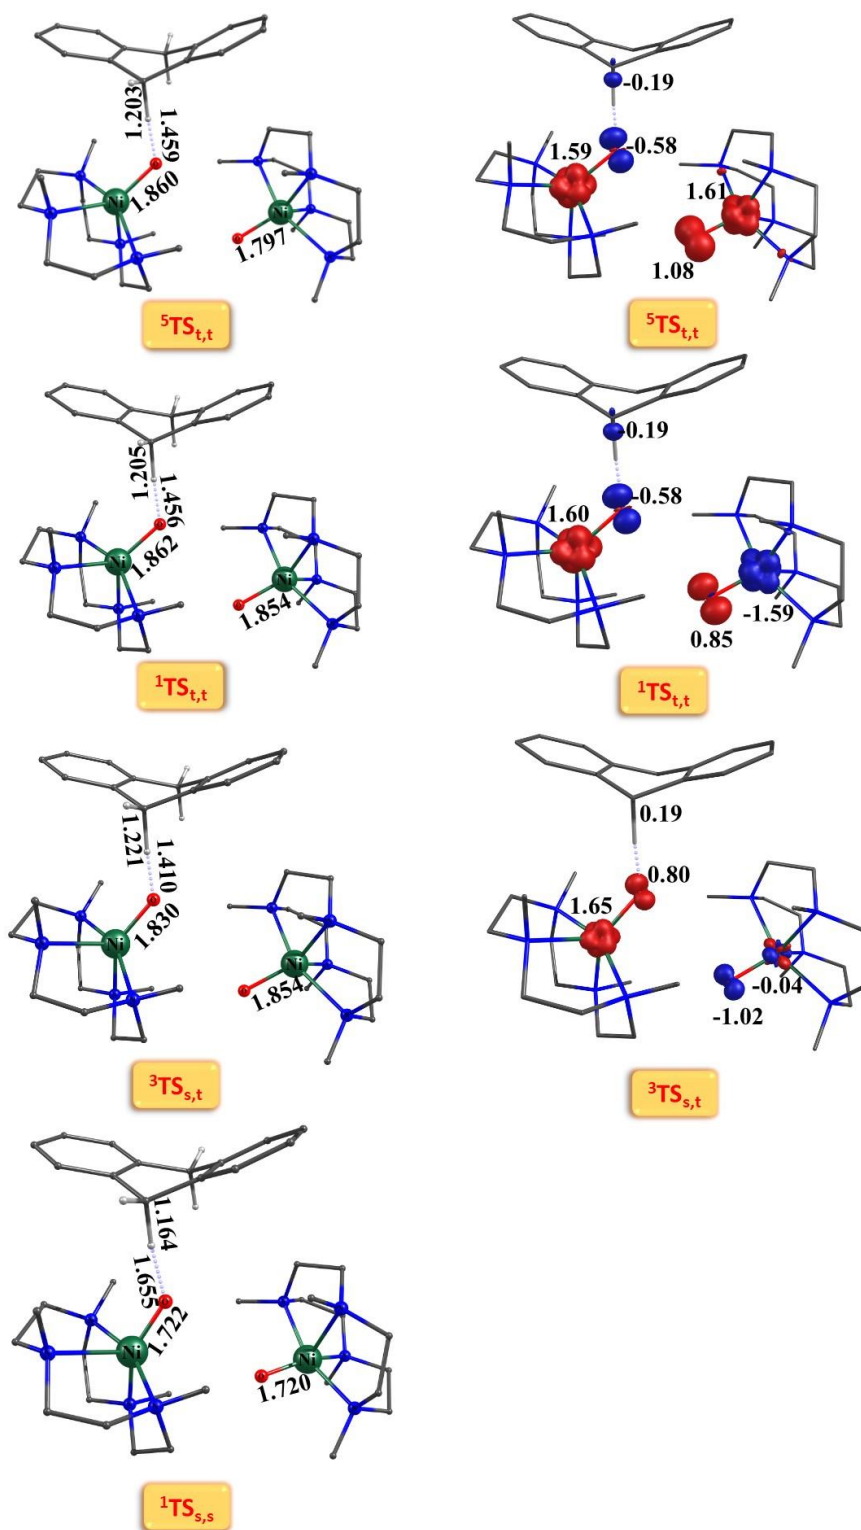

**Figure S5.** The optimized structures of the first hydrogen abstraction transition state (*tsI*) of complex **1**, and its corresponding spin density plot. Here all the hydrogen atoms (except alpha position hydrogens of the middle ring of the DHA substrate) are omitted for clarity.



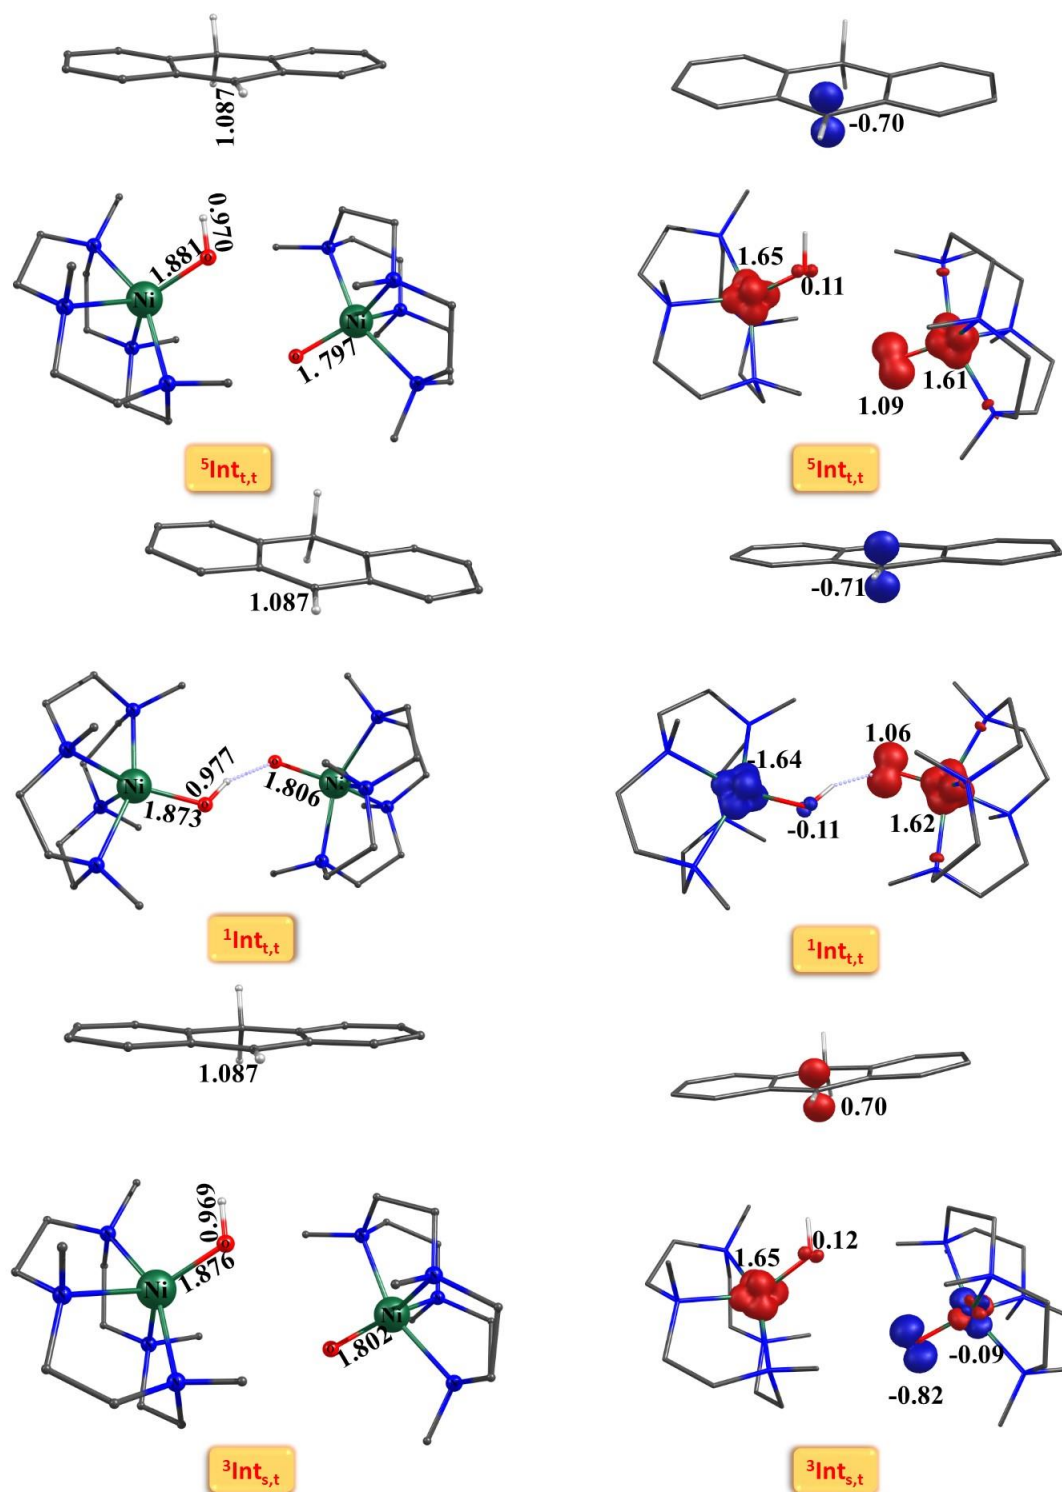

**Figure S6.** The optimized structure of intermediates of complex 1 and its corresponding spin density plot. Here all the hydrogen atoms (except alpha position hydrogens of the middle ring of the DHA substrate and abstracted hydrogen atom by the chalcogenide group) are omitted for clarity.

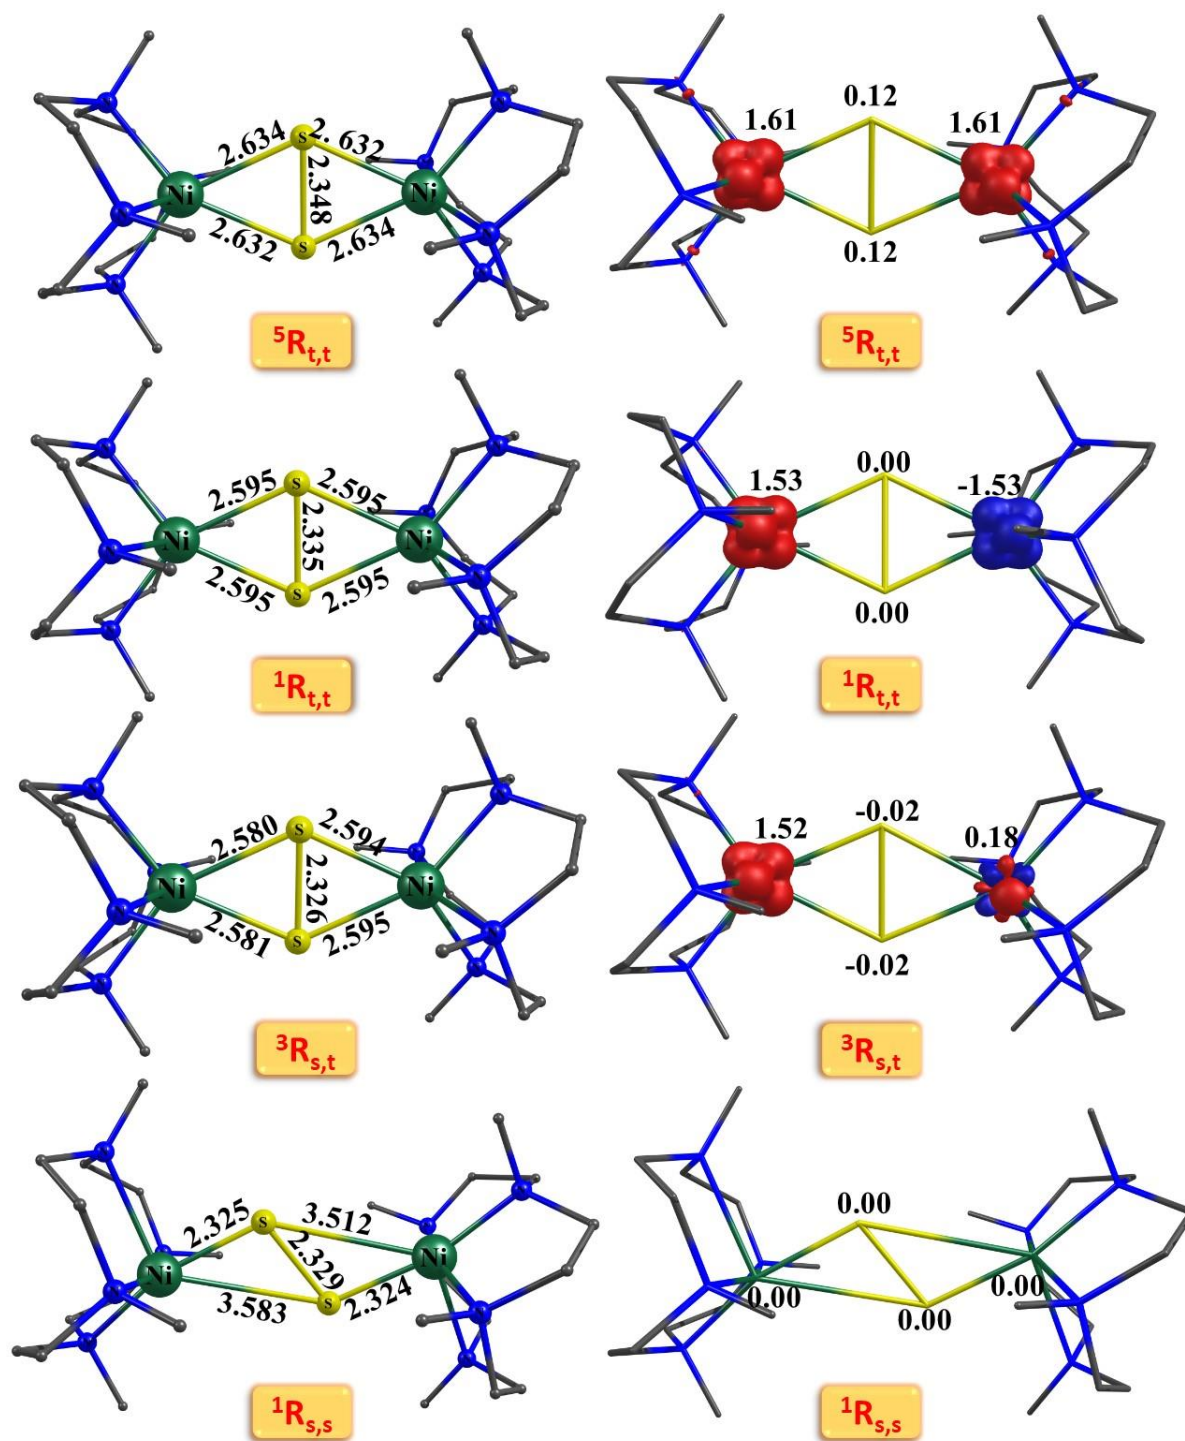

**Figure S7.** The optimized structure of reactant **2** and its corresponding spin density plot. Here all the hydrogen atoms are omitted for clarity.

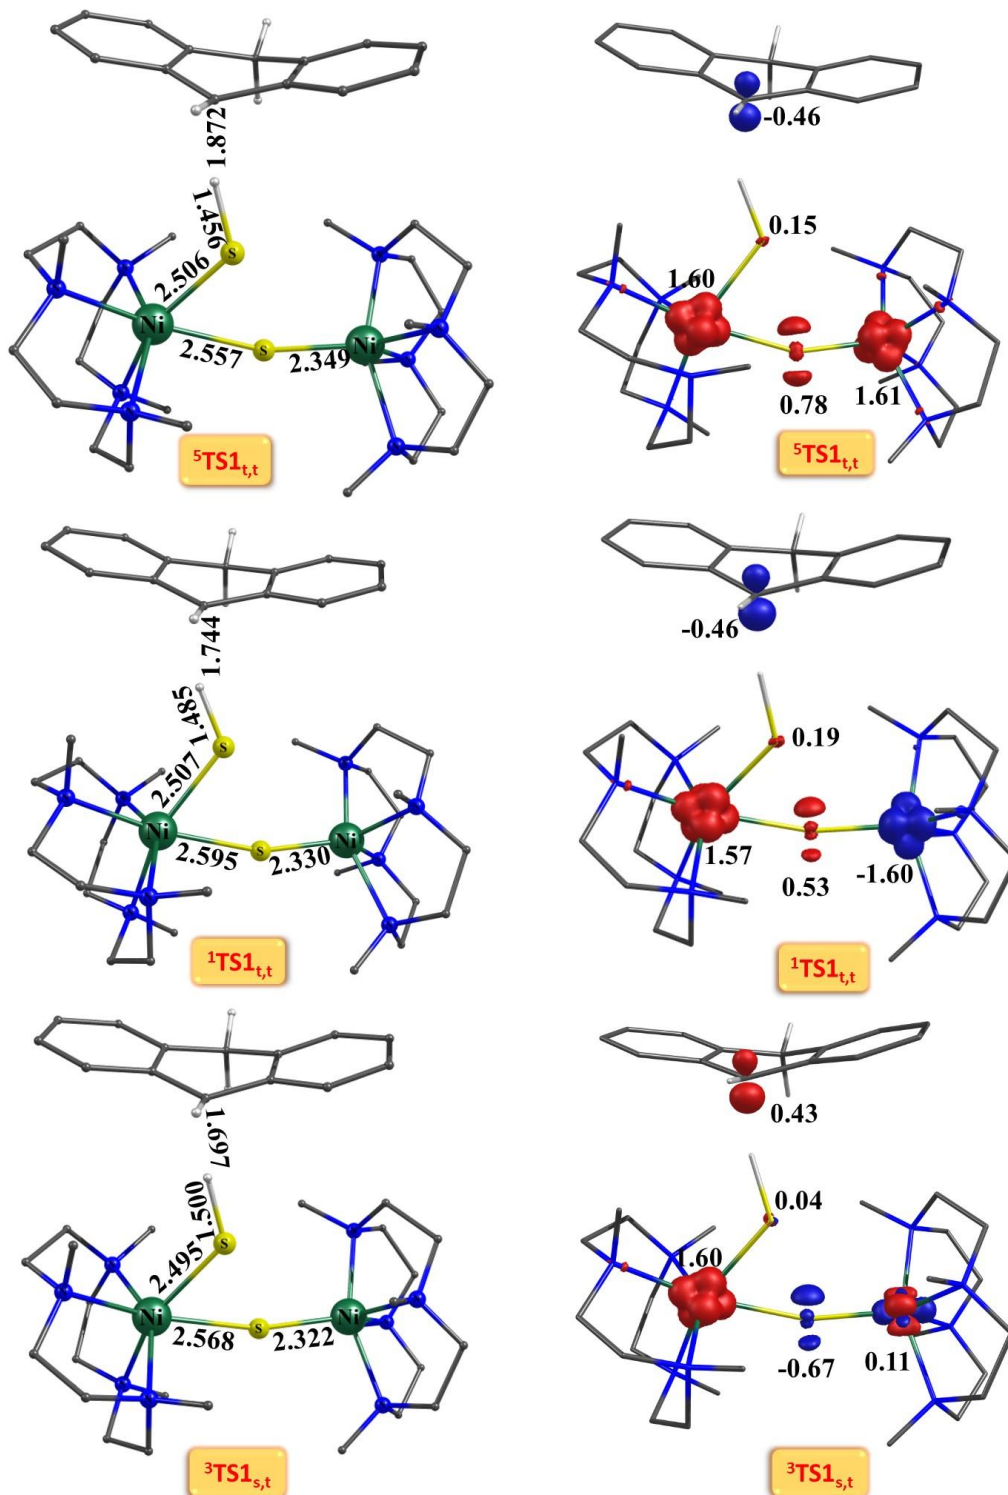

**Figure S8.** The optimized structure of the first hydrogen abstraction transition state ( $tsI$ ) of complex **2** and its corresponding spin density plot. Here all the hydrogen atoms (except alpha position hydrogens of the middle ring of the DHA substrate) are omitted for clarity.

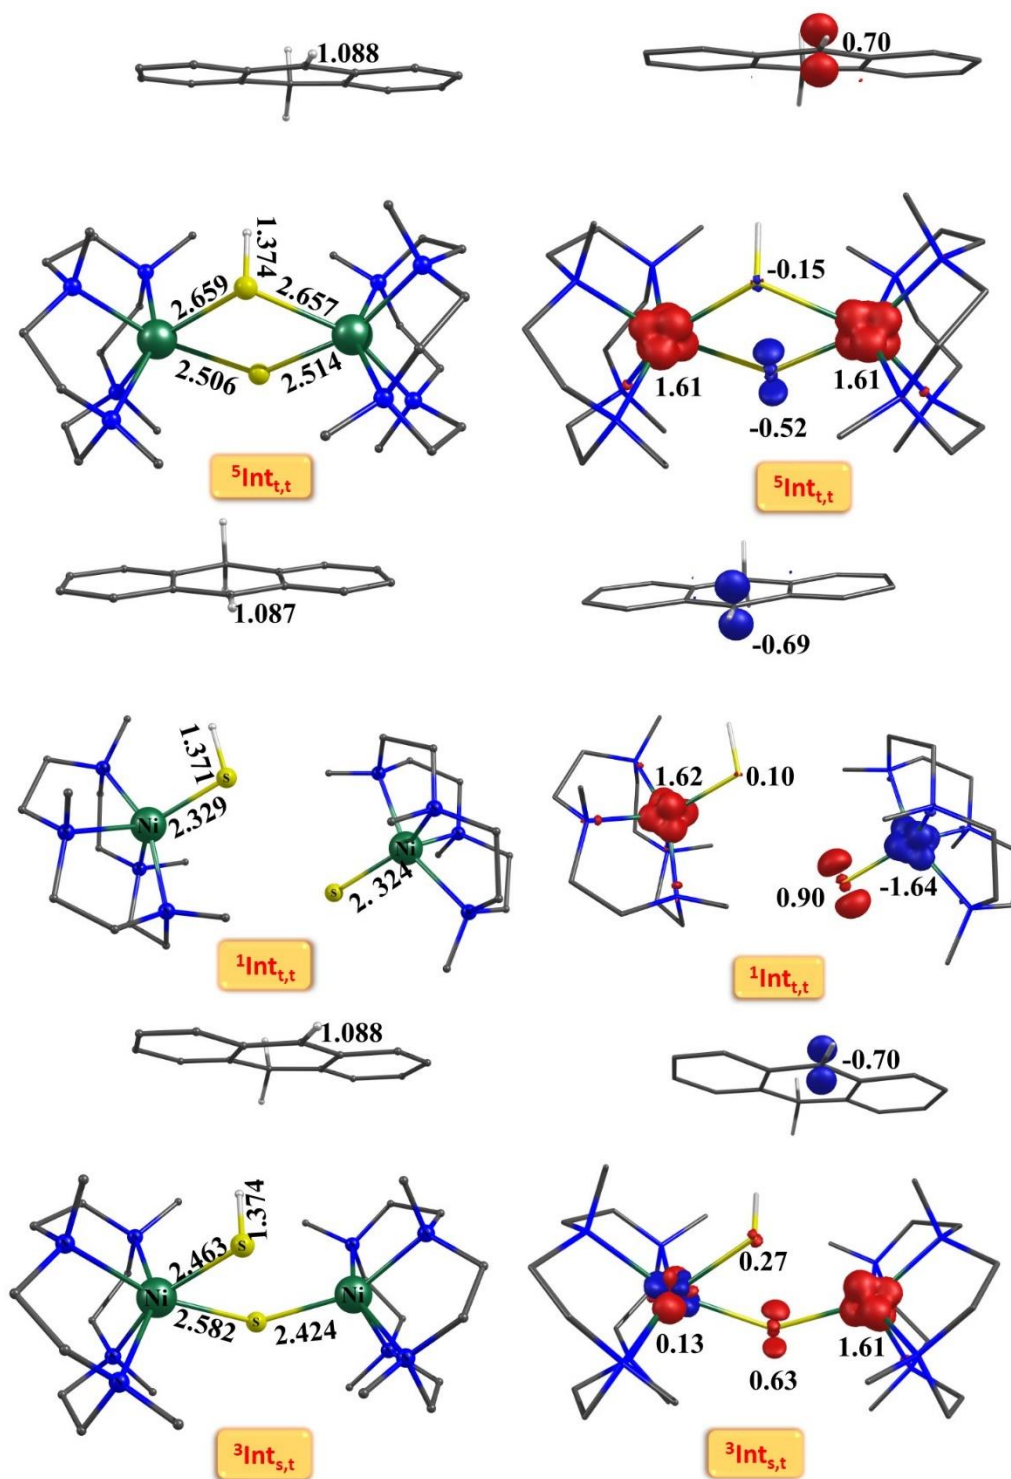

**Figure S9.** The optimized structure of intermediates of complex 2 and its corresponding spin density plot. Here all the hydrogen atoms (except alpha position hydrogens of the middle ring of the DHA substrate and abstracted hydrogen atom by the chalcogenide group) are omitted for clarity.

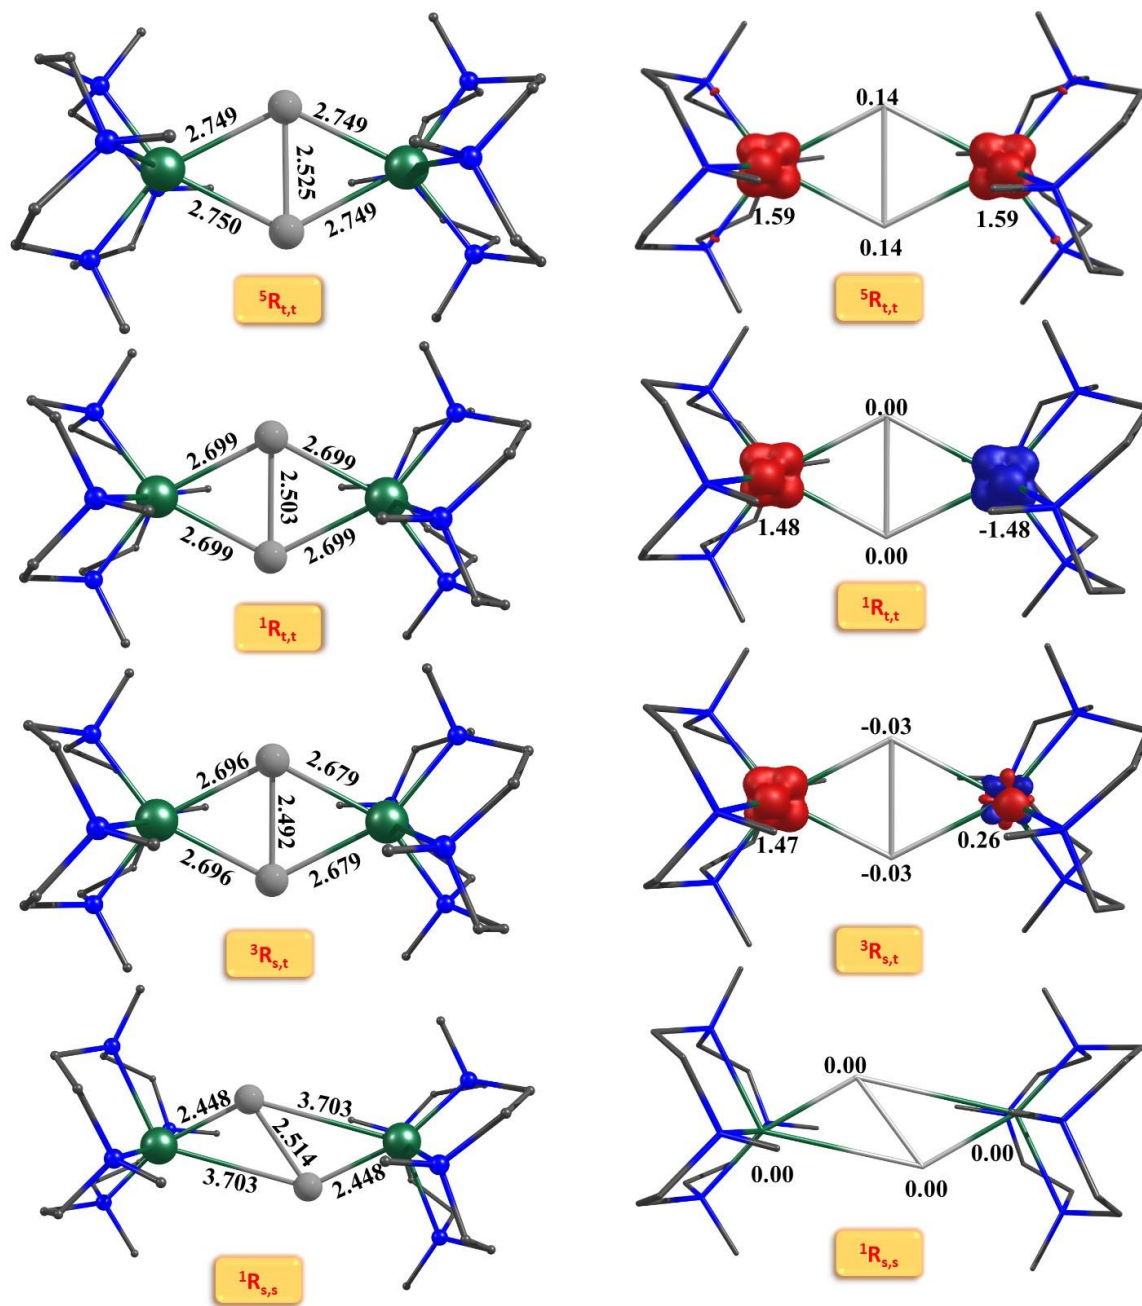

**Figure S10.** The optimized structure of reactant **3** and its corresponding spin density plot. Here all the hydrogen atoms are omitted for clarity.

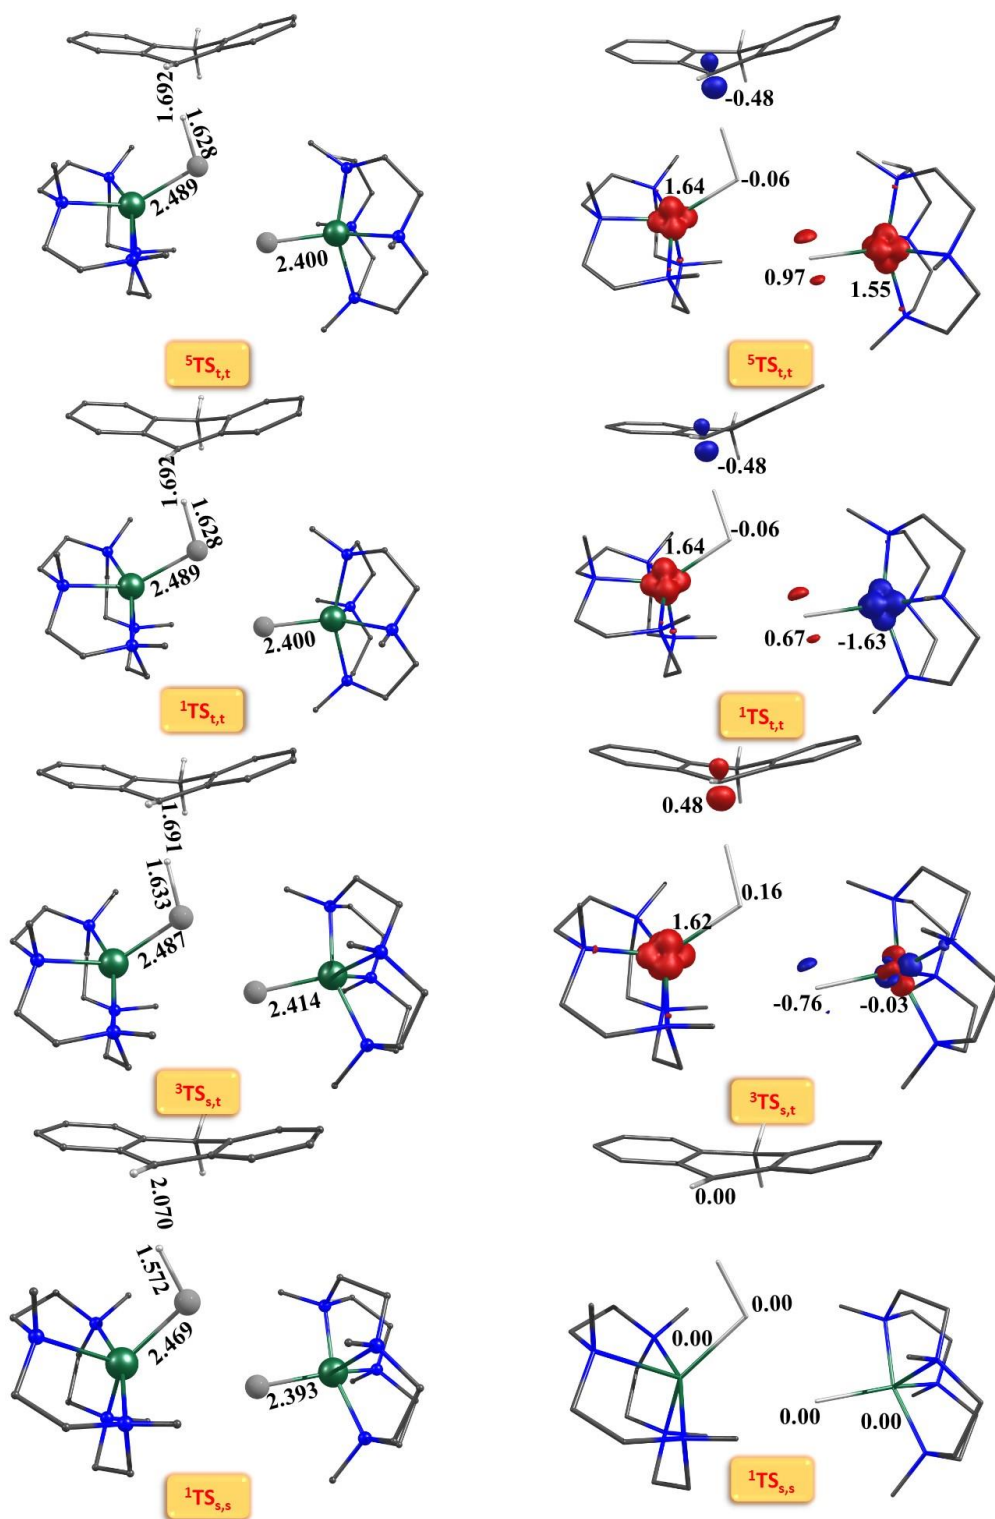

**Figure S11.** The optimized structure of the first hydrogen abstraction transition state (*tsI*) of complex **3** and its corresponding spin density plot. Here all the hydrogen atoms (except alpha position hydrogens of the middle ring of the DHA substrate) are omitted for clarity.

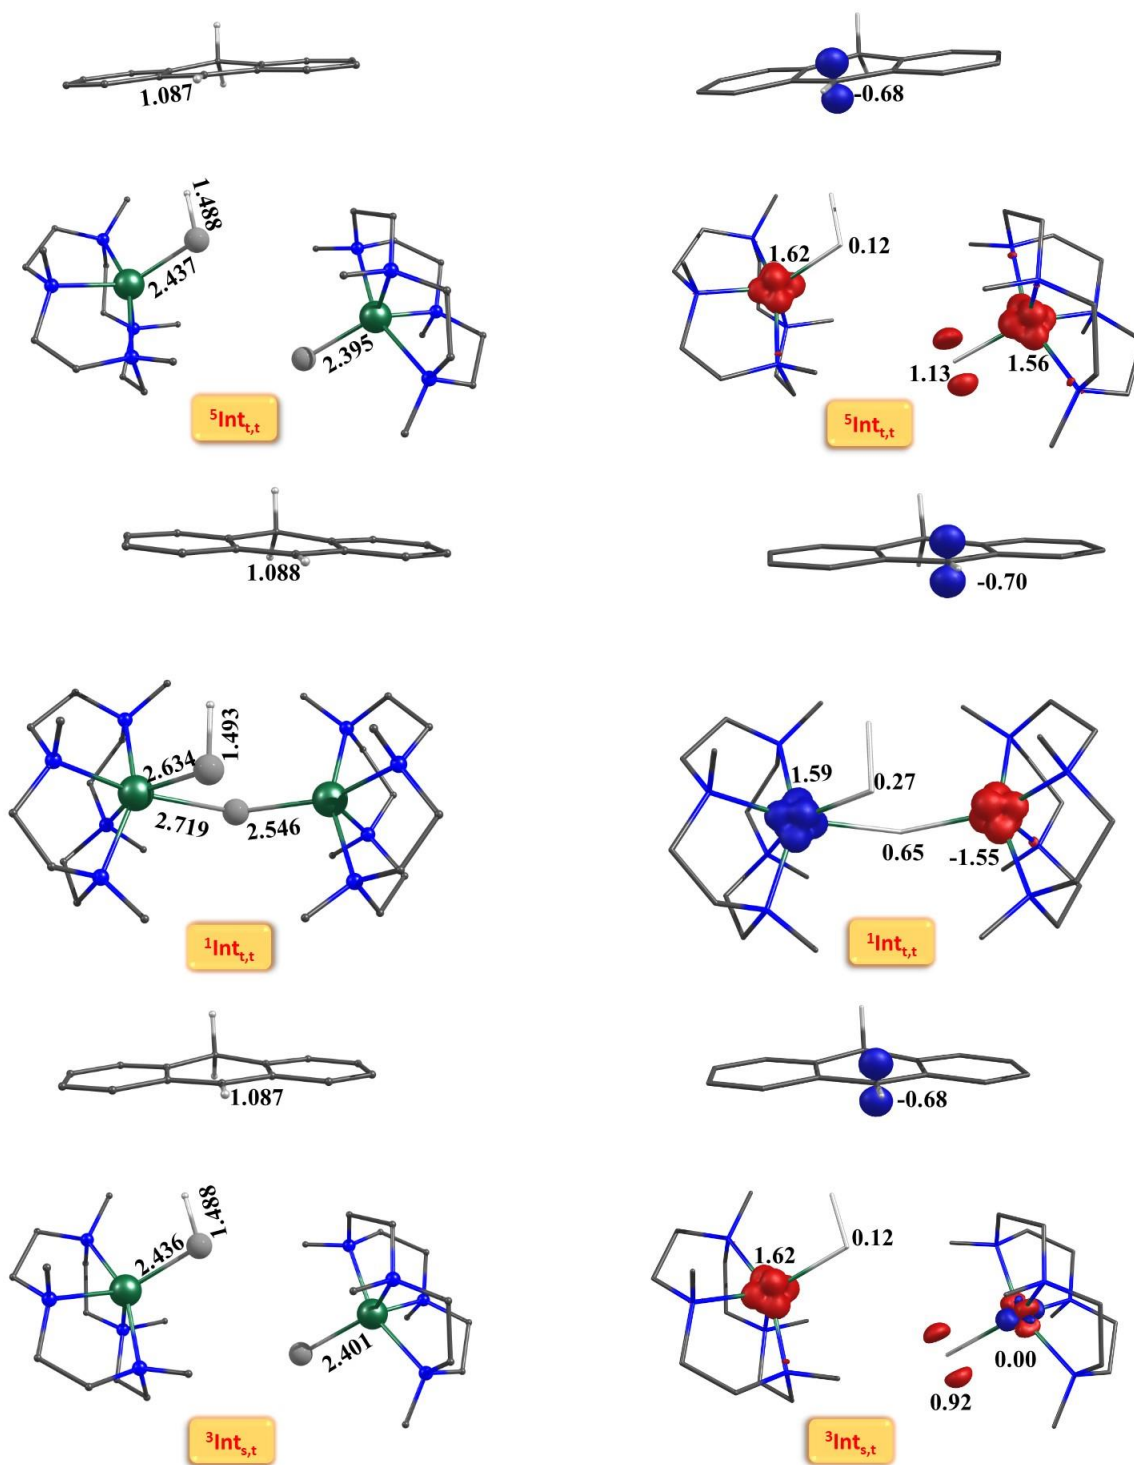

**Figure S12.** The optimized structure of intermediates of complex **3** and its corresponding spin density plot. Here all the hydrogen atoms (except alpha position hydrogens of the middle ring of the DHA substrate and abstracted hydrogen atom by the chalcogenide group) are omitted for clarity.

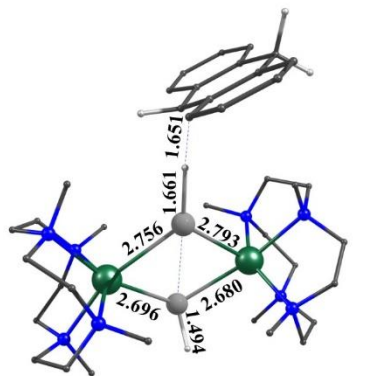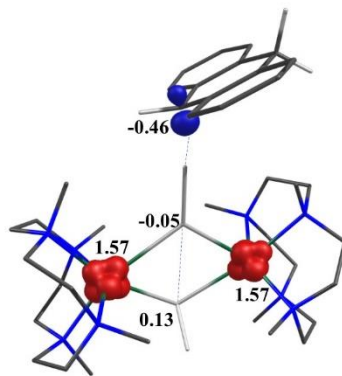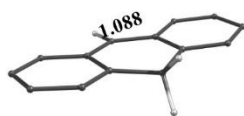

<sup>5</sup>TS2<sub>t,t</sub>

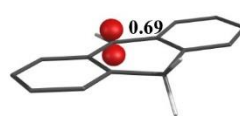

<sup>5</sup>TS2<sub>t,t</sub>

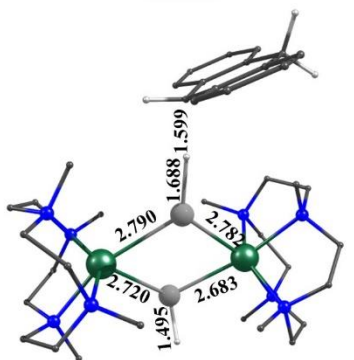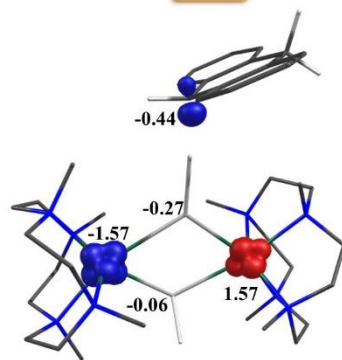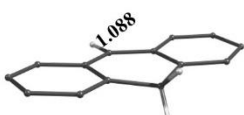

<sup>1</sup>TS2<sub>t,t</sub>

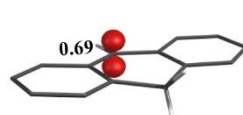

<sup>1</sup>TS2<sub>t,t</sub>

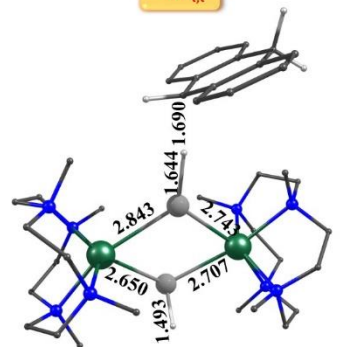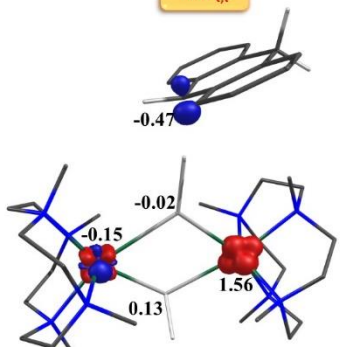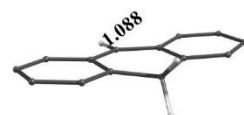

<sup>3</sup>TS2<sub>s,t</sub>

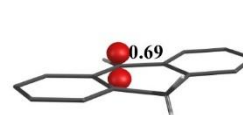

<sup>3</sup>TS2<sub>s,t</sub>



**Figure S13.** The optimized structure of the second hydrogen abstraction transition state (*ts2*) of complex **3** and its corresponding spin density plot. Here all the hydrogen atoms (except alpha position hydrogens of the middle ring of the DHA substrate and abstracted hydrogen atom by the chalcogenide group) are omitted for clarity.

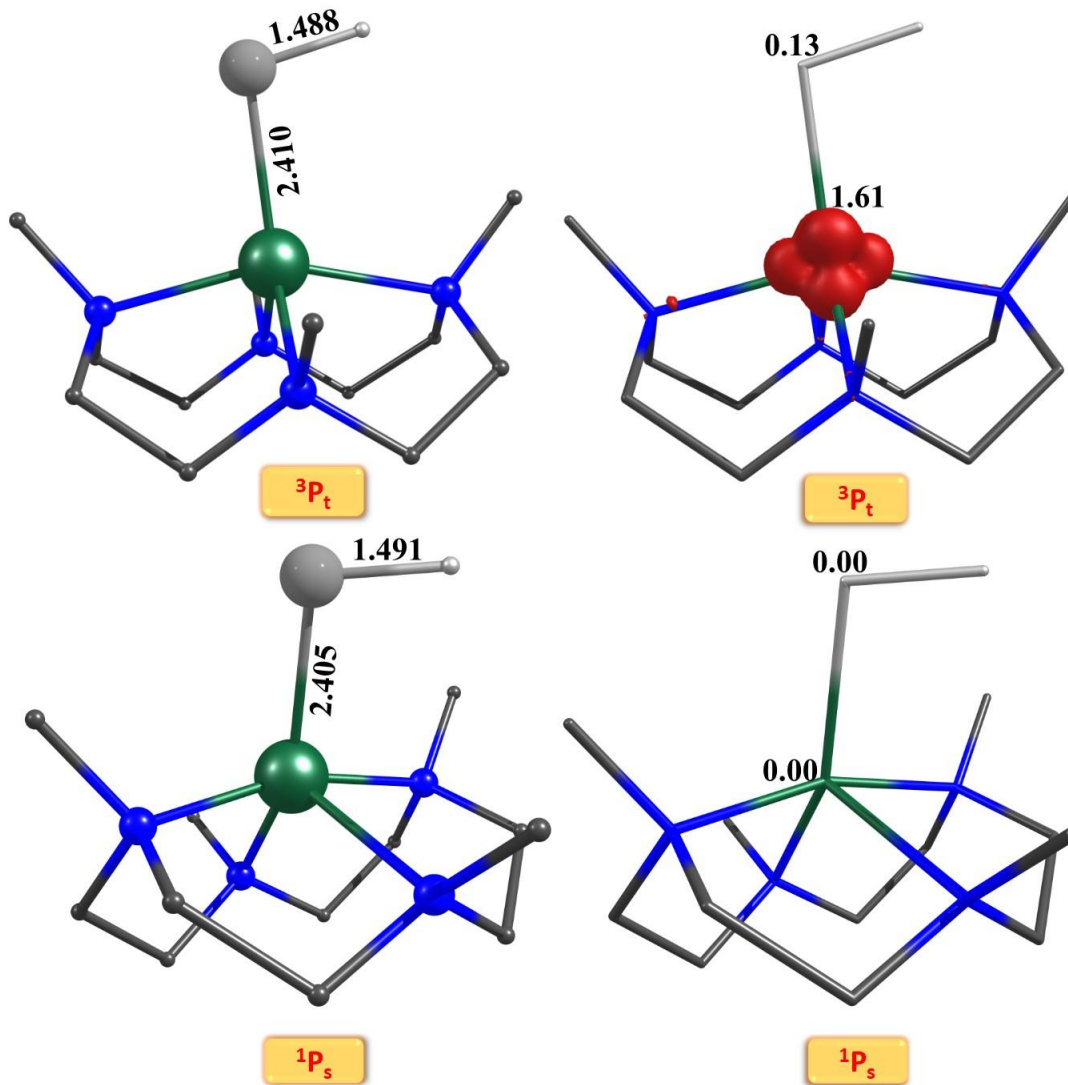

**Figure S14.** The optimized structure of monomer Nickel selenide complex (*PC*) of complex **3** and its corresponding spin density plot. Here all the hydrogen atoms (abstracted hydrogen atoms by the chalcogenide group) are omitted for clarity.

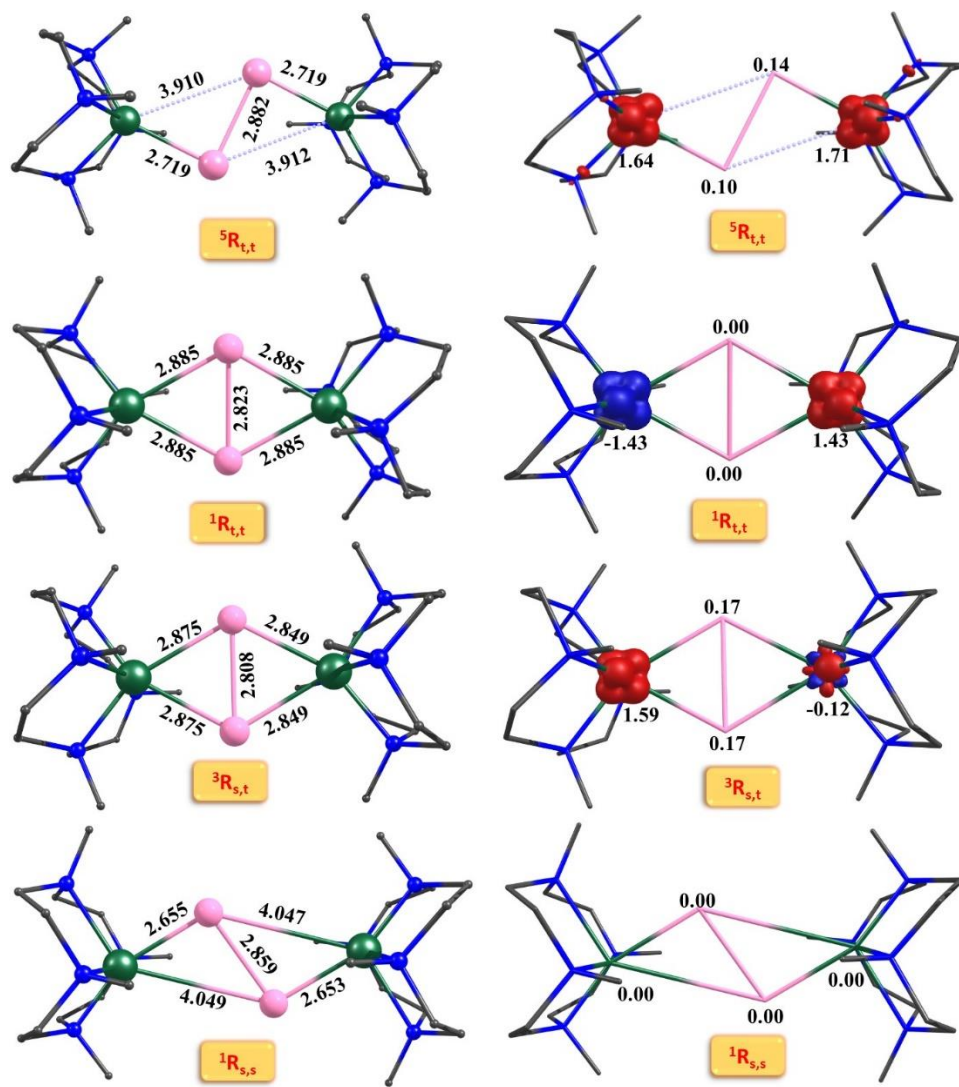

AIM analysis of excited state reactant species  $^5R_{(t,t)}$  for complex **4**, shows  $V(r)/G(r)$  value 0.76 for one of the Ni1-E1 bond and 1.23 for other Ni2-E2 bond.

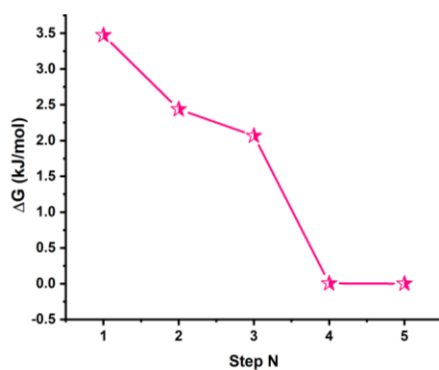

This change in symmetry occurred during the SCF convergence cycle, resulting in a high energy gap of 71.5 kJ between the singlet ground state ( $^14_{t,t}$ ) and the quintet excited state ( $^54_{t,t}$ ). Additionally, the SCF convergence graph shows that the side-on quintet geometry is only 3.5 kJ/mol higher in energy than the trans-end-on quintet geometry, which occurs only in the case of the quintet state of complex **4**. This results in a higher energy singlet-quintet gap compared to other complexes.

**Figure S15.** The optimized structure of reactant **4** and its corresponding spin density plot. Here all the hydrogen atoms are omitted for clarity. The bottom graph corresponds to SCF cycle progress of quintet state optimization on **4**.

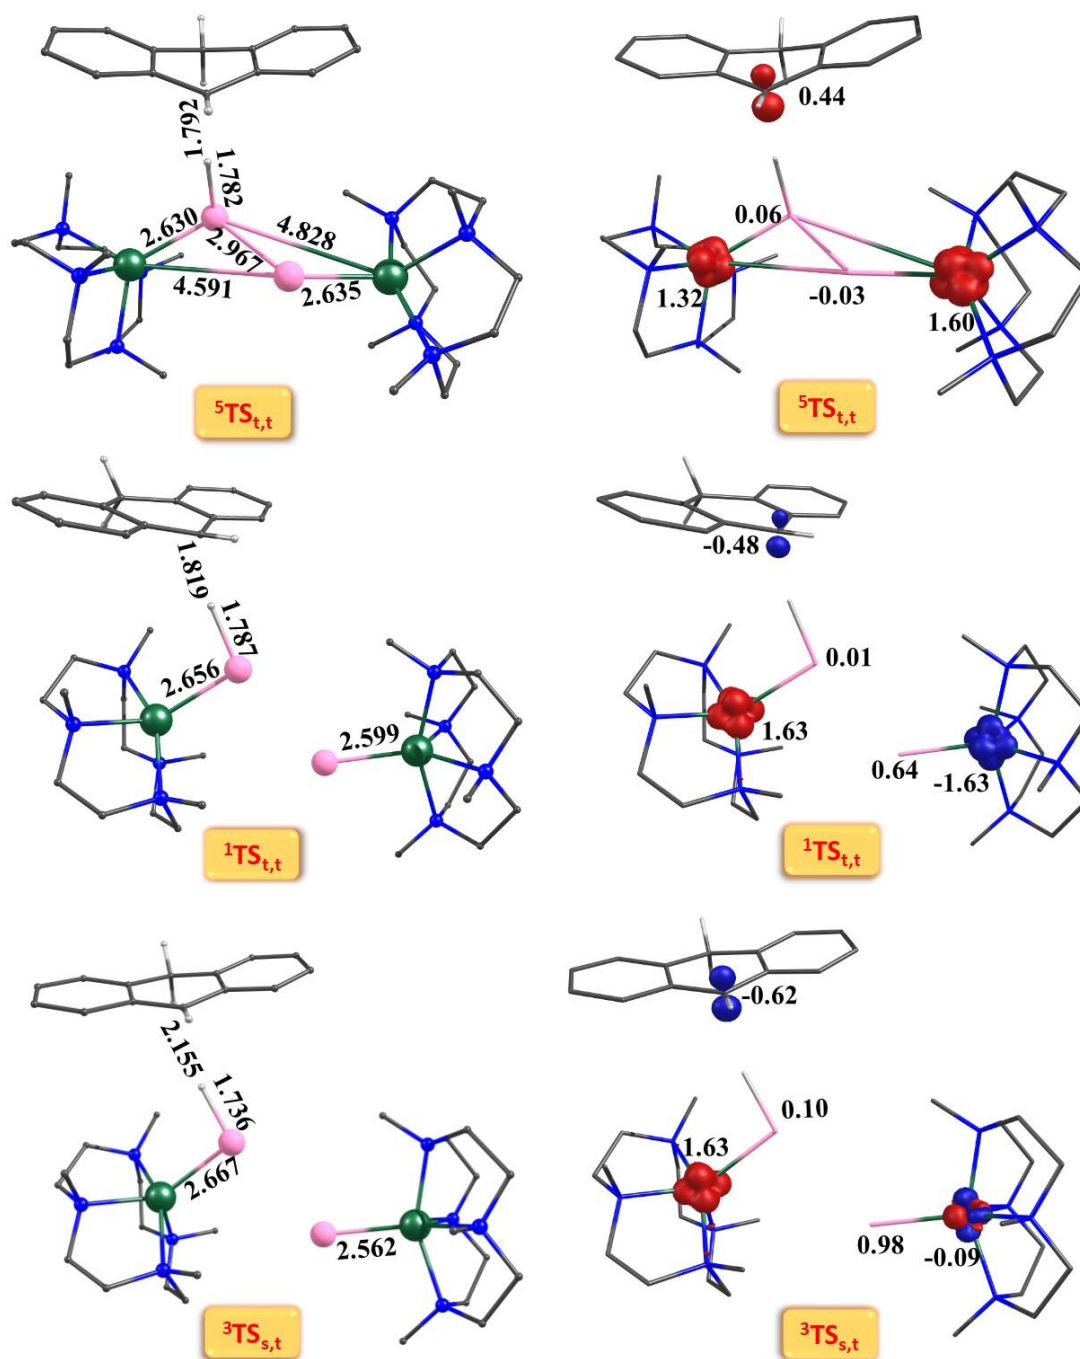

**Figure S16.** The optimized structure of the first hydrogen abstraction transition state (*tsI*) of complex **4** and its corresponding spin density plot. Here all the hydrogen atoms (except alpha position hydrogens of the middle ring of the DHA substrate) are omitted for clarity.

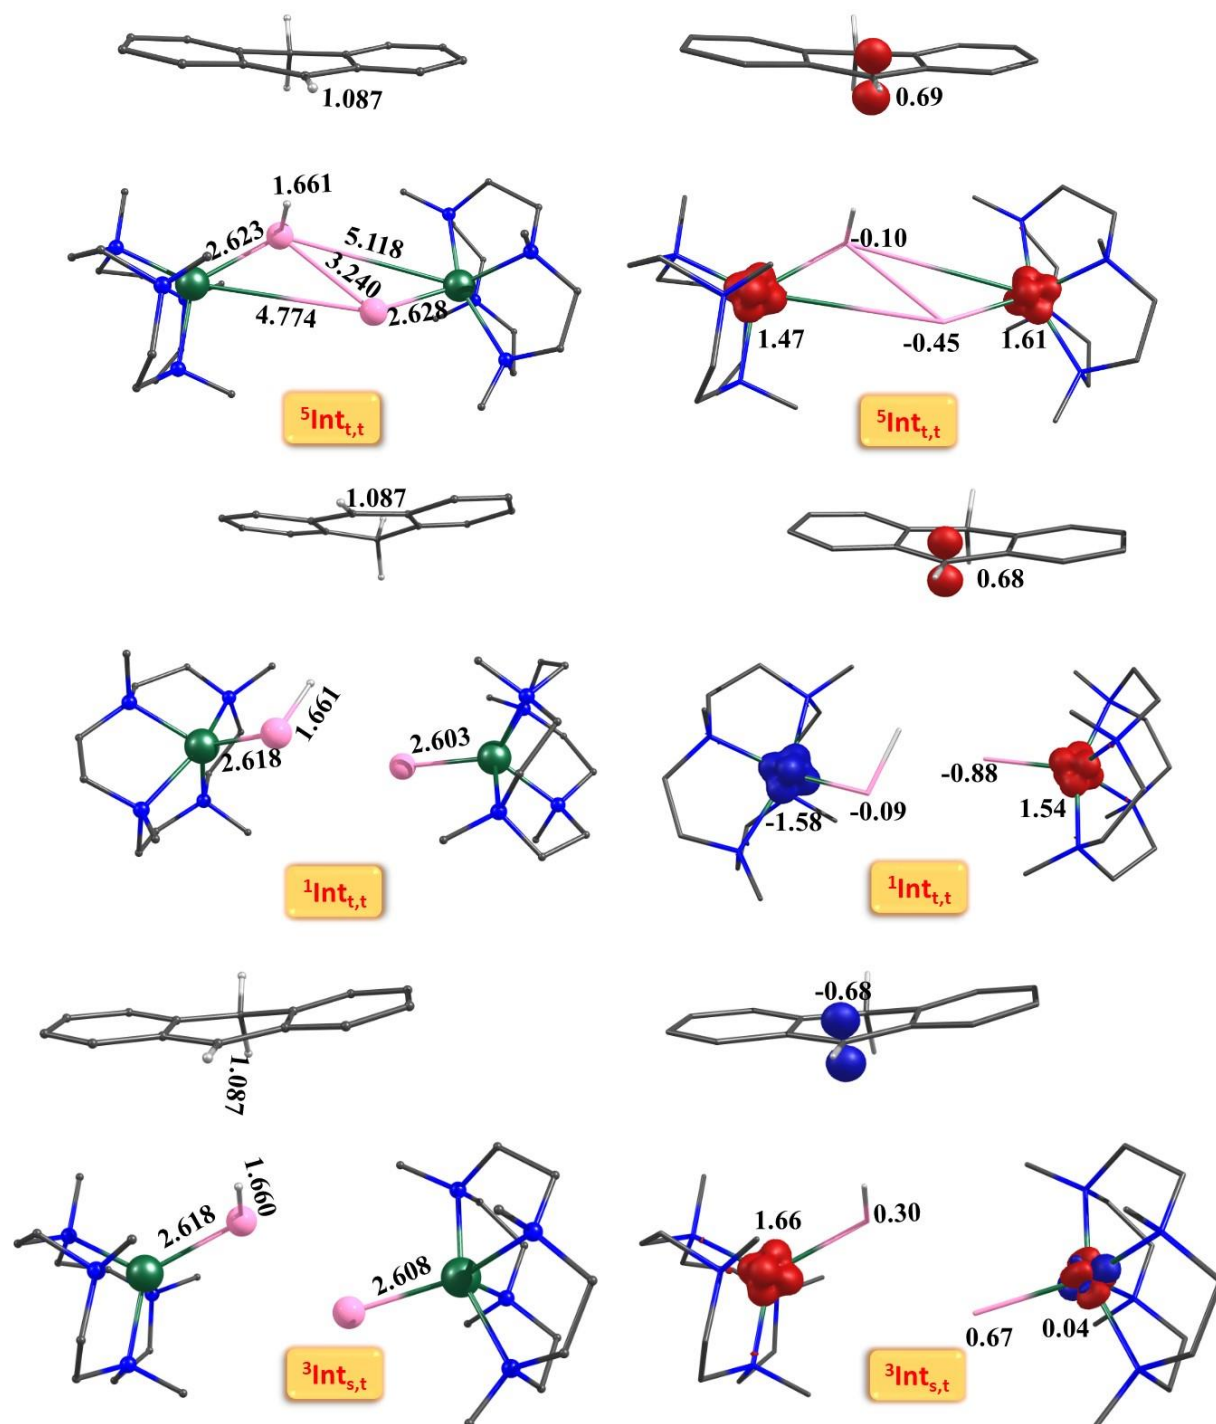

**Figure S17.** The optimized structure of the intermediates of complex 4 and its corresponding spin density plot. Here all the hydrogen atoms (except alpha position hydrogens of the middle ring of the DHA substrate) are omitted for clarity.

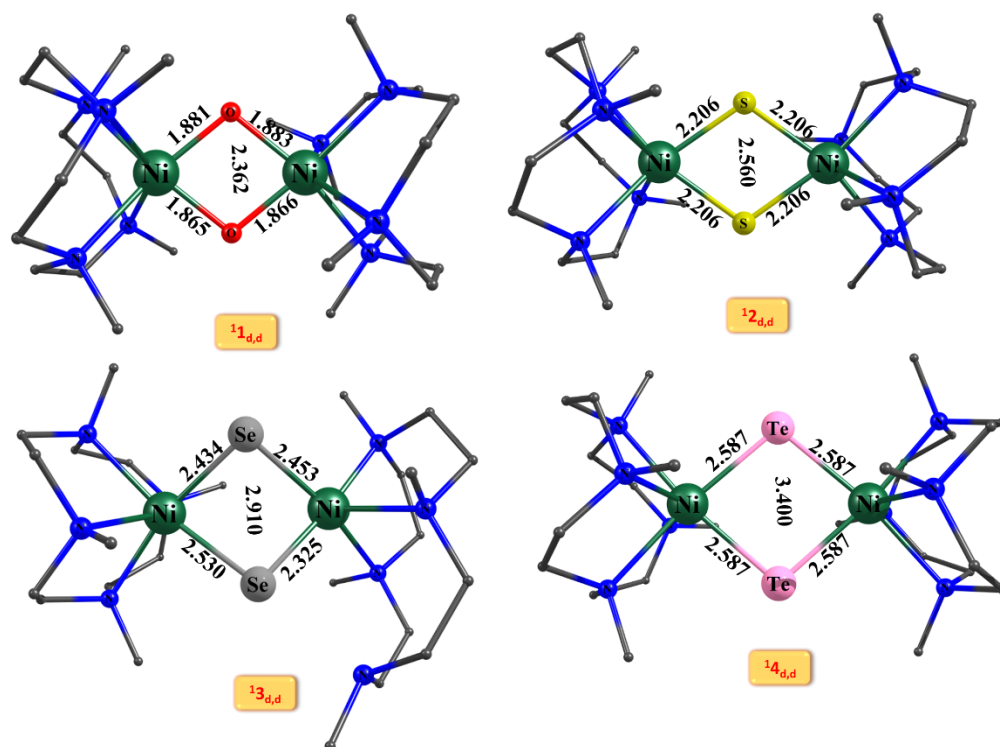

**Figure S18.** Optimized geometries of bis( $\mu$ -oxo)  $\{\text{Ni}_2(\text{III})\text{E}_2\}$  type complexes. (For optimization, fixed  $\text{Ni}_1\text{-Ni}_2$  and  $\text{E}_1\text{-E}_2$  distances on the basis of previous literature data).

**Table S1.** DLPNO-CCSD(T) calculated values –

| Complex                     | Amplitude (T1) |
|-----------------------------|----------------|
| $^5\mathbf{1}_{(t,t)}$ (T1) | 0.015          |
| $^1\mathbf{1}_{(t,t)}$ (T2) | 0.010          |

**Table S2.** The spin configurations are computed for **1-4**, along with its energetics. The value in the parenthesis is computed using DLPNO-CCSD(T) methods (see computational details).

| Spin States                                                                                          | Ni1                                                               | Ni2                                                               | Energy (kJ/mol) |       |       |       |
|------------------------------------------------------------------------------------------------------|-------------------------------------------------------------------|-------------------------------------------------------------------|-----------------|-------|-------|-------|
|                                                                                                      |                                                                   |                                                                   | 1               | 2     | 3     | 4     |
| <b>[Ni(II)<sub>2</sub>(μ-η<sup>2</sup>:η<sup>2</sup>-E<sub>2</sub>)(L)<sub>2</sub>]<sup>2+</sup></b> |                                                                   |                                                                   |                 |       |       |       |
| <sup>5</sup> R <sub>(t,t)</sub>                                                                      | $\delta_{xy} \pi_{yz}^* \pi_{xz}^* \sigma_{x^2-y^2}^* \sigma_z^*$ | $\delta_{xy} \pi_{yz}^* \pi_{xz}^* \sigma_{x^2-y^2}^* \sigma_z^*$ | 12.3<br>(2.6)   | 16.1  | 12.4  | 71.5  |
| <sup>1</sup> R <sub>(t,t)</sub>                                                                      | $\delta_{xy} \pi_{yz}^* \pi_{xz}^* \sigma_{x^2-y^2}^* \sigma_z^*$ | $\delta_{xy} \pi_{yz}^* \pi_{xz}^* \sigma_{x^2-y^2}^* \sigma_z^*$ | 0.0<br>(0.0)    | 0.0   | 0.0   | 0.0   |
| <sup>3</sup> R <sub>(s,t)</sub>                                                                      | $\delta_{xy} \pi_{yz}^* \pi_{xz}^* \sigma_{x^2-y^2}^* \sigma_z^*$ | $\delta_{xy} \pi_{yz}^* \pi_{xz}^* \sigma_{x^2-y^2}^* \sigma_z^*$ | 53.6            | 47.7  | 46.0  | 81.9  |
| <sup>1</sup> R <sub>(s,s)</sub>                                                                      | $\delta_{xy} \pi_{yz}^* \pi_{xz}^* \sigma_{x^2-y^2}^* \sigma_z^*$ | $\delta_{xy} \pi_{yz}^* \pi_{xz}^* \sigma_{x^2-y^2}^* \sigma_z^*$ | 336.5<br>(380)  | 156.4 | 159.8 | 180.8 |
| <b>[Ni(III)<sub>2</sub>(μ-E)<sub>2</sub>(L)<sub>2</sub>]<sup>2+</sup></b>                            |                                                                   |                                                                   |                 |       |       |       |
| <sup>1</sup> R <sub>(d,d)</sub>                                                                      | $\delta_{xy} \pi_{yz}^* \pi_{xz}^* \sigma_{x^2-y^2}^* \sigma_z^*$ | $\delta_{xy} \pi_{yz}^* \pi_{xz}^* \sigma_{x^2-y^2}^* \sigma_z^*$ | 61.6            | 72.5  | 144.4 | 102.1 |

**Table S3.** Selected structural parameters reported for structurally analogue complexes (X-ray) along with DFT computed ground state geometries for **1-4**.

| a | Complexes                                                                                                                                                                                                           | Ni-E (Å)             | Ni1-Ni2 (Å)          | E1-E2 (Å)            | Ni-E-Ni (°)    | E-Ni-E (°)  | Ref.                  |
|---|---------------------------------------------------------------------------------------------------------------------------------------------------------------------------------------------------------------------|----------------------|----------------------|----------------------|----------------|-------------|-----------------------|
|   | <sup>1</sup> L <sub>t,t</sub><br>[(L)Ni] <sub>2</sub> (μ-O) <sub>2</sub> <sup>a</sup><br>/[LNi <sup>III</sup> (μ-O) <sub>2</sub> Ni <sup>III</sup> L] <sup>b</sup>                                                  | 2.047<br>1.841-1.870 | 3.810<br>2.882-3.130 | 1.500<br>1.820-2.390 | 137<br>105     | 43<br>75    | This work<br>1-3      |
|   | <sup>1</sup> 2 <sub>t,t</sub><br>[(L)Ni(μ-S <sub>2</sub> )-Ni(L)] <sup>+c</sup><br>/[(L)Ni] <sub>2</sub> (μ-η <sup>2</sup> :η <sup>2</sup> -S <sub>2</sub> ) <sup>d</sup>                                           | 2.595<br>2.217-2.234 | 4.635<br>3.865-3.926 | 2.335<br>2.208-2.177 | 126<br>120-122 | 53<br>58-59 | This work<br>4-6      |
|   | <sup>1</sup> 3 <sub>t,t</sub><br>[[L)Ni] <sub>2</sub> (μ-η <sup>2</sup> :η <sup>2</sup> -Se <sub>2</sub> ) <sup>e</sup><br>/[[Ni(L)] <sub>2</sub> (μ-η <sup>2</sup> :η <sup>2</sup> -Se <sub>2</sub> ) <sup>f</sup> | 2.699<br>2.557-2.566 | 4.781<br>3.438       | 2.503<br>2.379-2.479 | 125<br>125     | 55<br>55    | This work<br>5, 7, 8, |
|   | <sup>1</sup> 4 <sub>t,t</sub><br>[(L)Ni(Te <sub>2</sub> )Ni(L)] <sup>g</sup><br>/[(LNi <sup>II</sup> ) <sub>2</sub> Te <sub>2</sub> ] <sup>h</sup>                                                                  | 2.885<br>2.576-2.596 | 5.033<br>3.771       | 2.823<br>2.802       | 121<br>-       | 59<br>66    | This work<br>5, 9     |

(L=(PhTt<sup>tBu</sup>)), b (L= Tp<sup>Me3</sup>), c (L= triphos), d (L= PhTt<sup>tBu</sup>), e (L=(PhTt<sup>tBu</sup>)), f L=(Me<sub>4</sub>[12]aneN<sub>4</sub>), g (L=MeC(CH<sub>2</sub>PPh<sub>2</sub>)<sub>3</sub>), h (L=β-diketiminiate, CH(CMeNR)<sub>2</sub>).

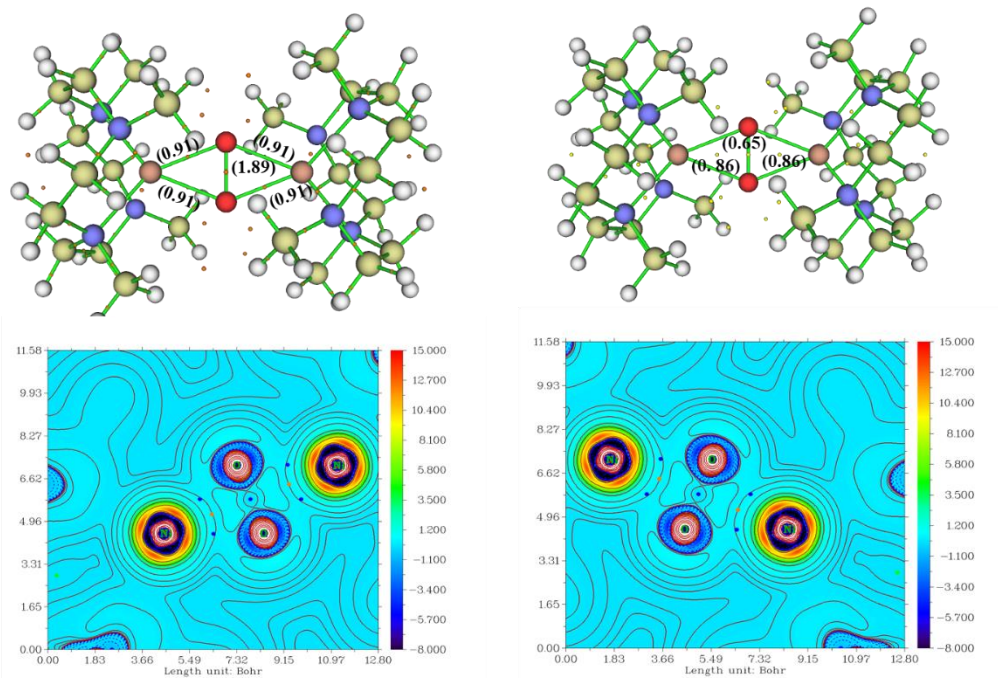

**Figure S19.** AIM plots for complex 1 (For ground state  ${}^1\mathbf{R}_{(t,t)}$ ).

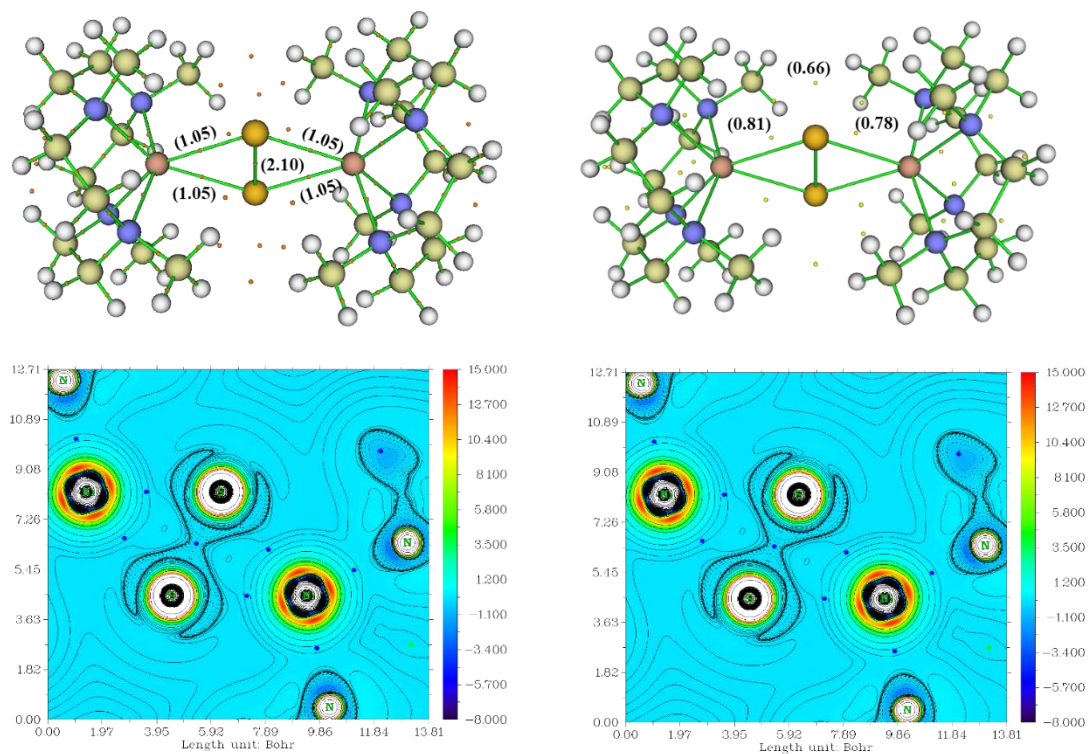

**Figure S20.** AIM plots for complex 2 (For ground state  ${}^1\mathbf{R}_{(t,t)}$ ).

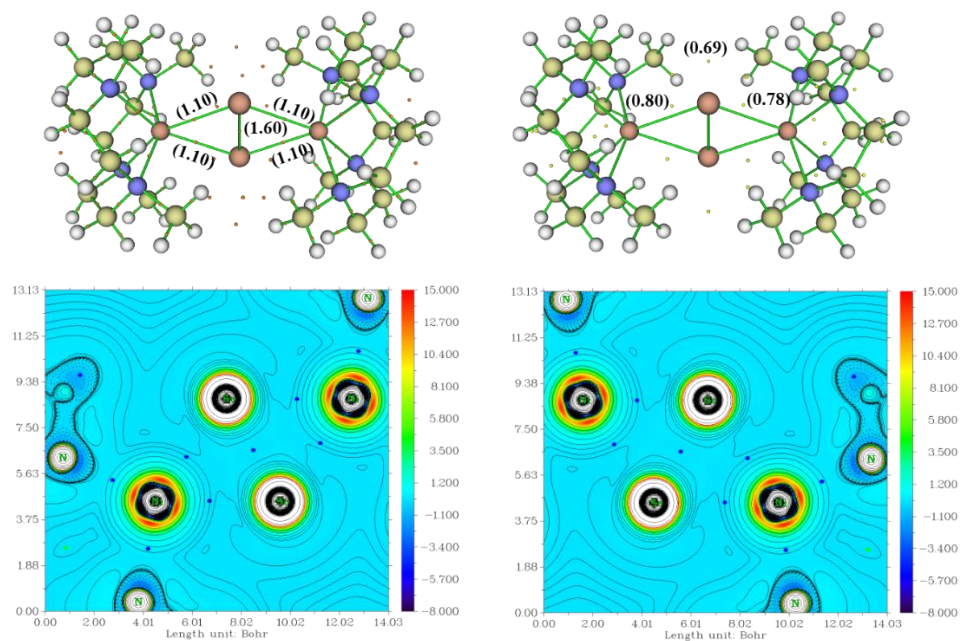

**Figure S21.** AIM plots for complex **3** (For ground state  ${}^1\mathbf{R}_{(t,t)}$ ).

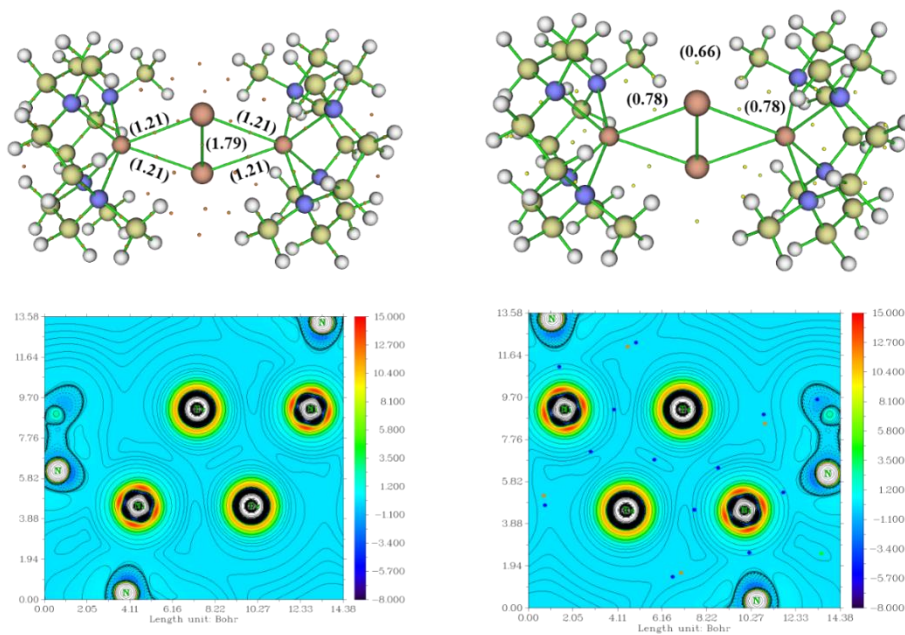

**Figure S22.** AIM plots for complex **4** (For ground state  ${}^1\mathbf{R}_{(t,t)}$ ).



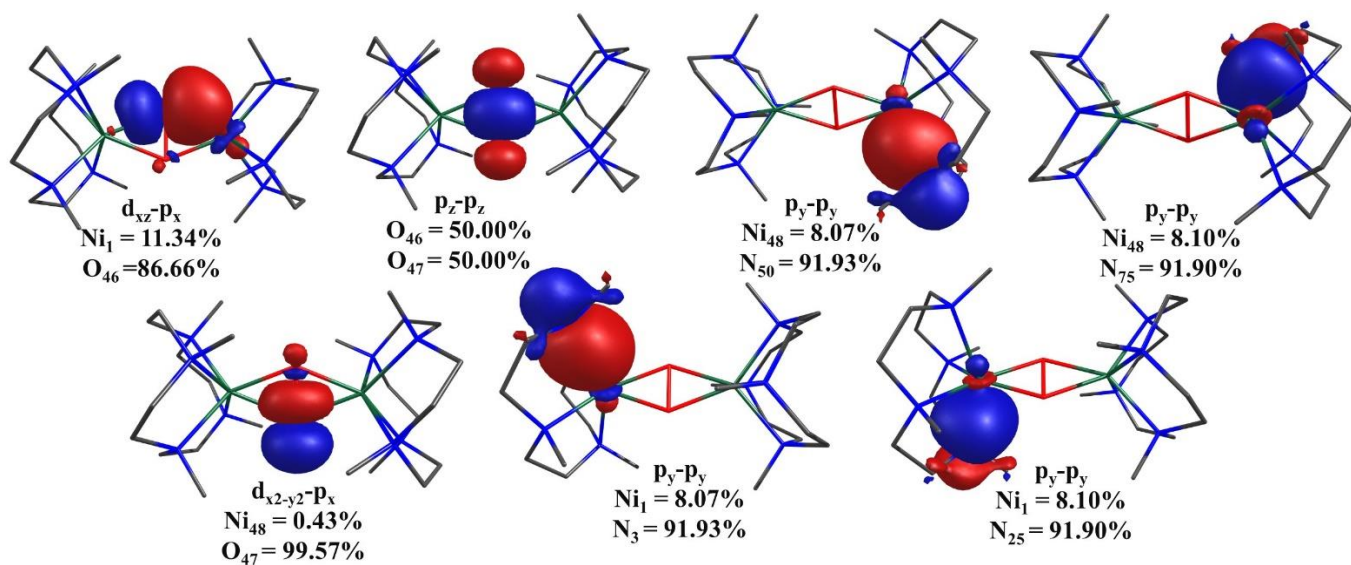

**Figure S23.** Computed NBO plots for complex 1 (for the ground state  ${}^1\mathbf{R}_{(t,t)}$ ).

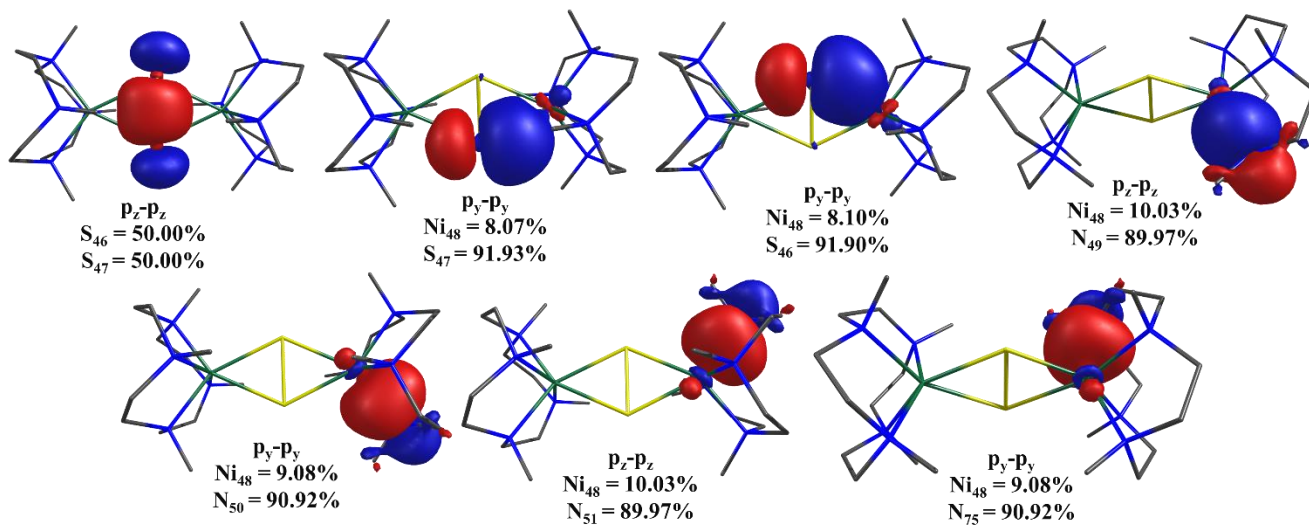

**Figure S24.** Computed NBO plots for complex 2 (for the ground state  ${}^1\mathbf{R}_{(t,t)}$ ).

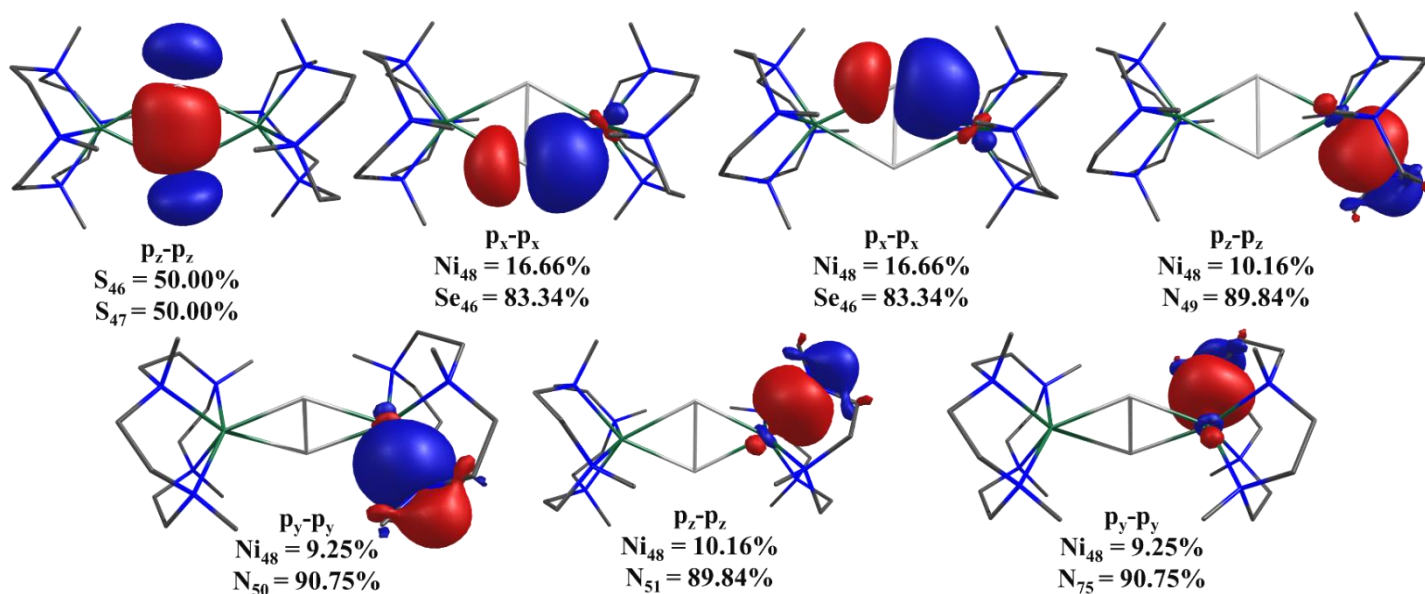

**Figure S25.** Computed NBO plots for complex **3** (for the ground state  $^1R_{(t,t)}$ ).

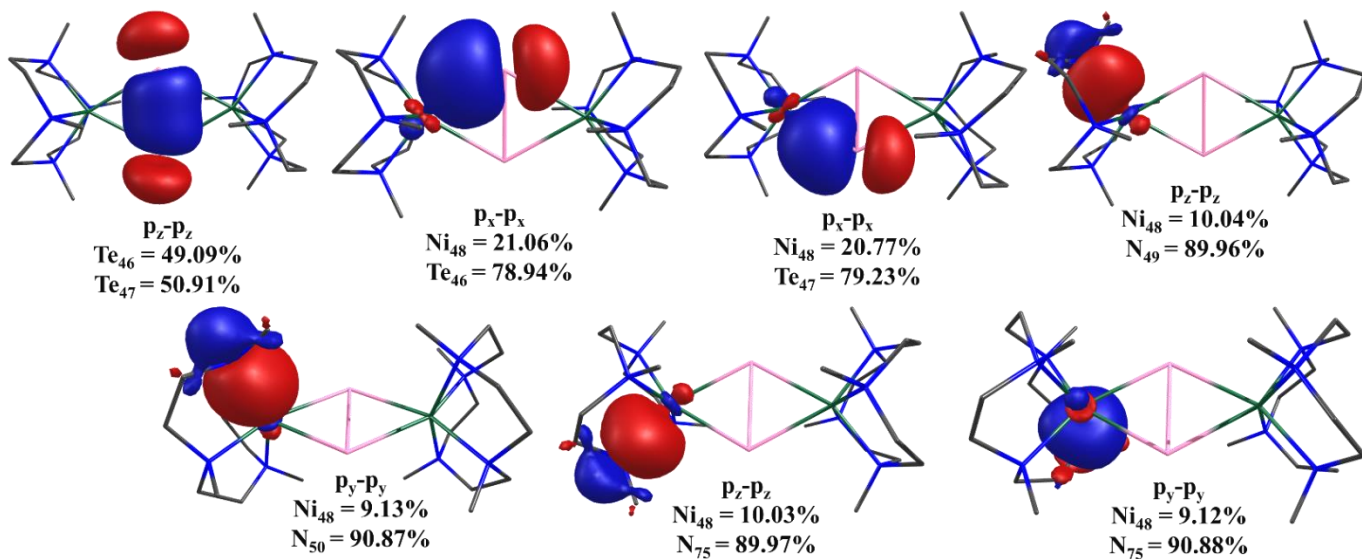

**Figure S26.** Computed NBO plots for complex **4** (for the ground state  $^1R_{(t,t)}$ ).

**Table S4-** WBI values for ground state only of complexes  $^1\mathbf{1-4}_{(t,t)}$ .

| WBI (GS)                  | Ni-E1 | Ni1-E2 | E1-E2 | Ni2-E1 | Ni2-E2 | Ni1-Ni2 |
|---------------------------|-------|--------|-------|--------|--------|---------|
| $^1\mathbf{1}_{(hs, bs)}$ | 0.261 | 0.261  | 1.032 | 0.261  | 0.261  | 0.040   |
| $^1\mathbf{2}_{(hs, bs)}$ | 0.363 | 0.363  | 1.013 | 0.363  | 0.363  | 0.026   |
| $^1\mathbf{3}_{(hs, bs)}$ | 0.376 | 0.376  | 0.922 | 0.376  | 0.376  | 0.016   |
| $^1\mathbf{4}_{(hs, bs)}$ | 0.478 | 0.478  | 0.932 | 0.478  | 0.478  | 0.024   |

**Table S5-** The second-order perturbation analysis of donor (i) and acceptor (j) orbital with their stabilization energies ( $E_2$ ) (in kcal/mol).

| Donar (i)                             | Acceptor (j)         | Stabilization Energy ( $E_2$ ) |
|---------------------------------------|----------------------|--------------------------------|
| BD O <sub>46</sub> -O <sub>47</sub>   | LP* Ni <sub>48</sub> | 9.3                            |
| BD S <sub>46</sub> -S <sub>47</sub>   | LP* Ni <sub>48</sub> | 11.7                           |
| BD Se <sub>46</sub> -Se <sub>47</sub> | LP* Ni <sub>48</sub> | 13.2                           |
| BD Te <sub>46</sub> -Te <sub>47</sub> | LP* Ni <sub>48</sub> | 16.8                           |
| LP O <sub>47</sub>                    | LP* Ni <sub>48</sub> | 13.8                           |
| LP S <sub>47</sub>                    | LP* Ni <sub>48</sub> | 19.4                           |
| LP Se <sub>47</sub>                   | LP* Ni <sub>48</sub> | 22.0                           |
| LP Te <sub>47</sub>                   | LP* Ni <sub>48</sub> | 23.0                           |

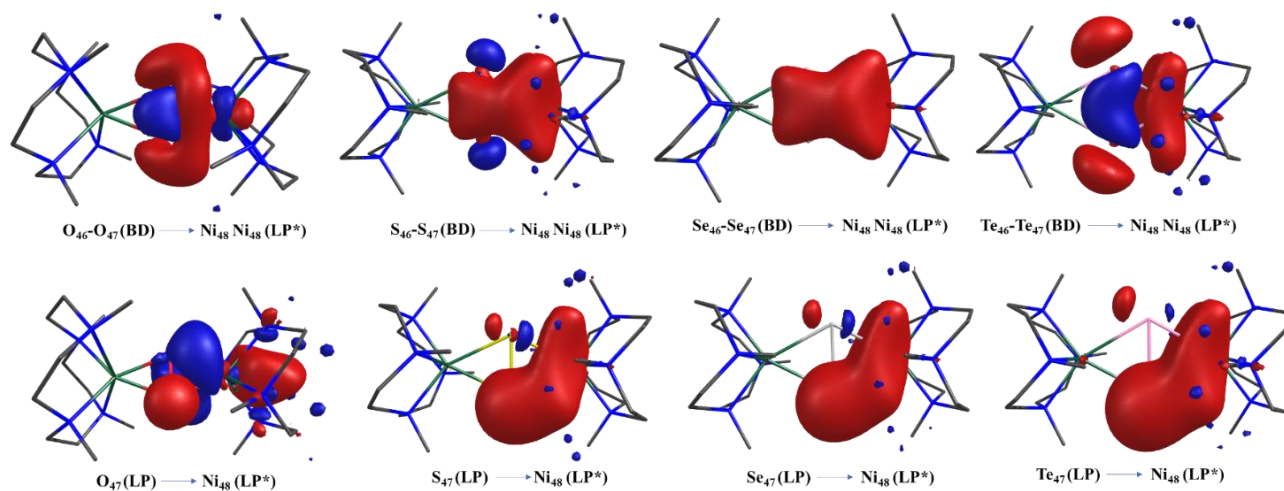**Figure S27.** Computed NBO plots for complex  $^1\mathbf{1-4}_{(t,t)}$ .

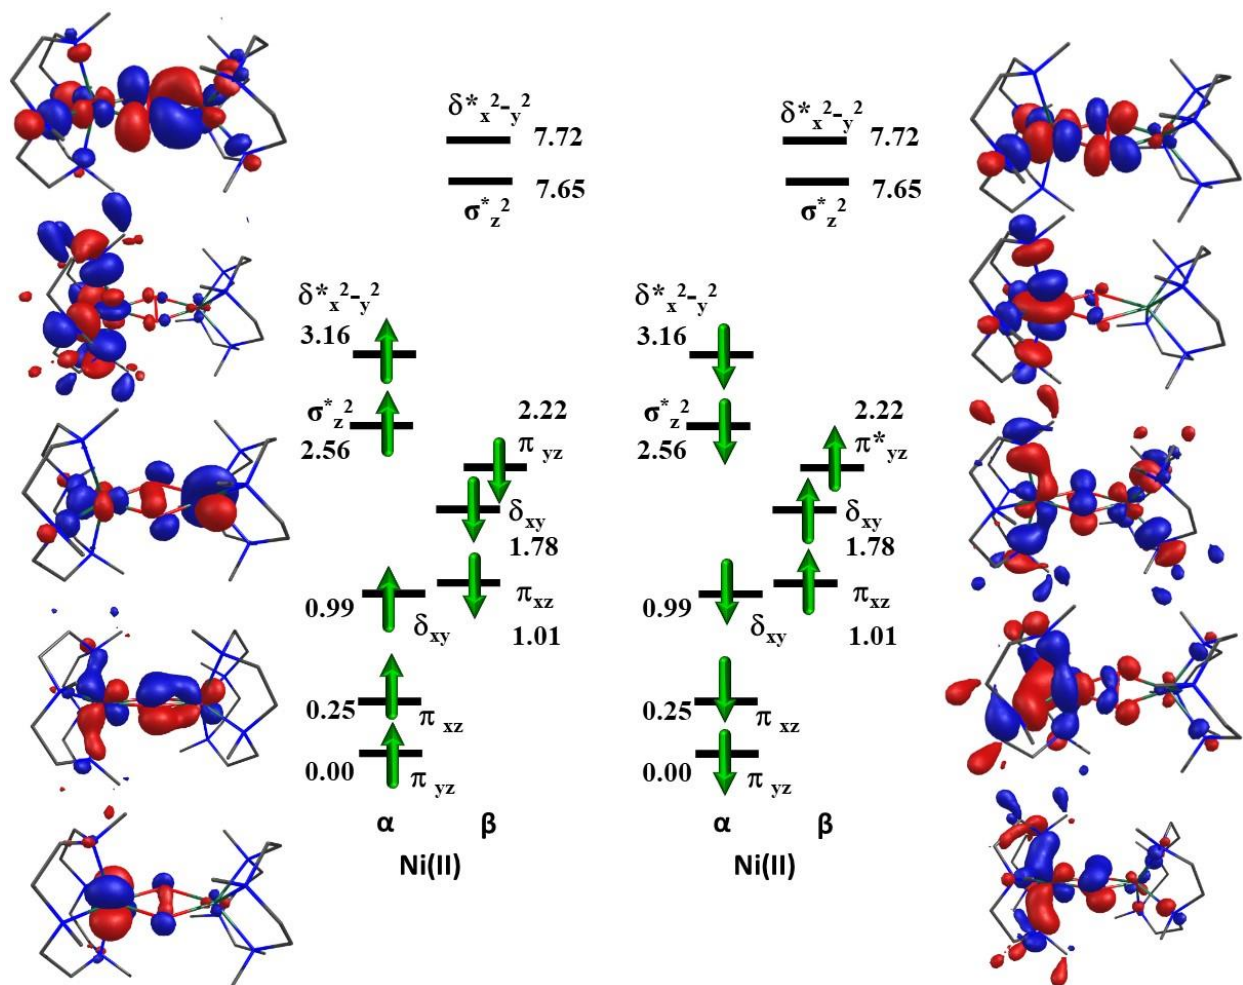

**Figure S28.** Computed eigenvalue plot incorporating energies computed for d-based orbitals for alpha and beta spin corresponding to the ground state  $^1R_{(t,t)}$  of the complex **1** (energies are given in eV)

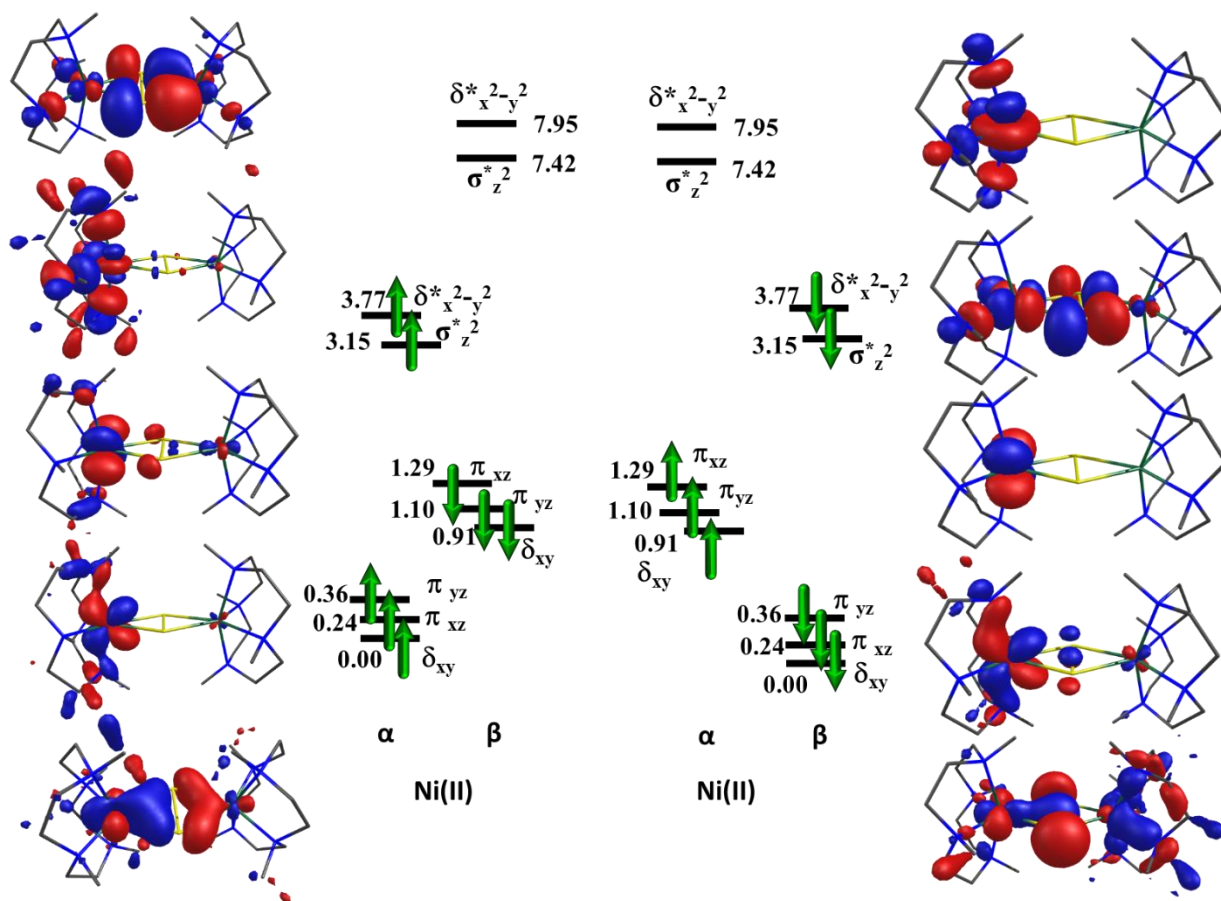

**Figure S29.** Computed eigenvalue plot incorporating energies computed for d-based orbitals for alpha and beta spin corresponding to the ground state  $^1R_{(t,t)}$  of the complex **2** (energies are given in eV)

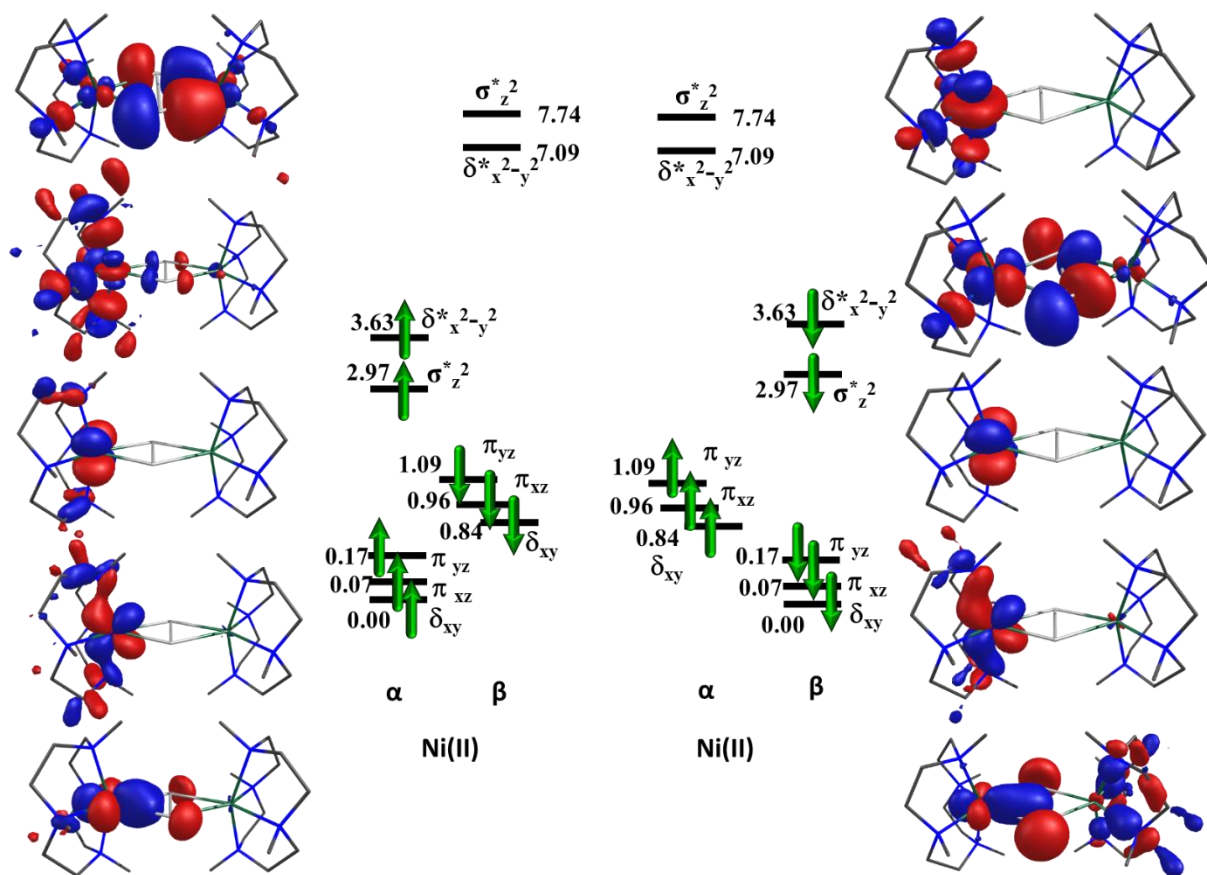

**Figure S30.** Computed eigenvalue plot incorporating energies computed for d-based orbitals for alpha and beta spin corresponding to the ground state  $^1R_{(t,t)}$  of the complex **3** (energies are given in eV)

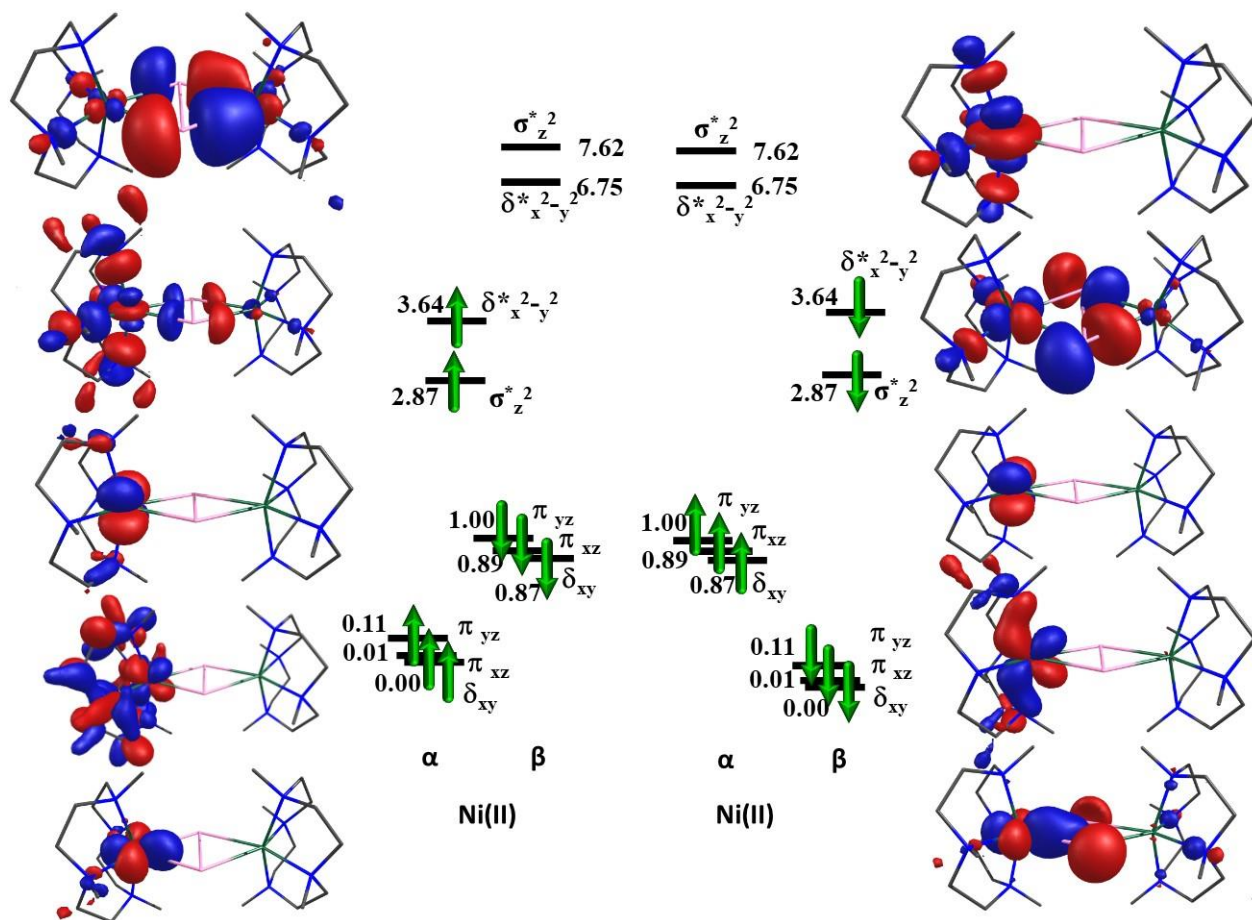

**Figure S31.** Computed eigenvalue plot incorporating energies computed for d-based orbitals for alpha and beta spin corresponding to the ground state  $^1R_{(t,t)}$  of the complex **4** (energies are given in eV)

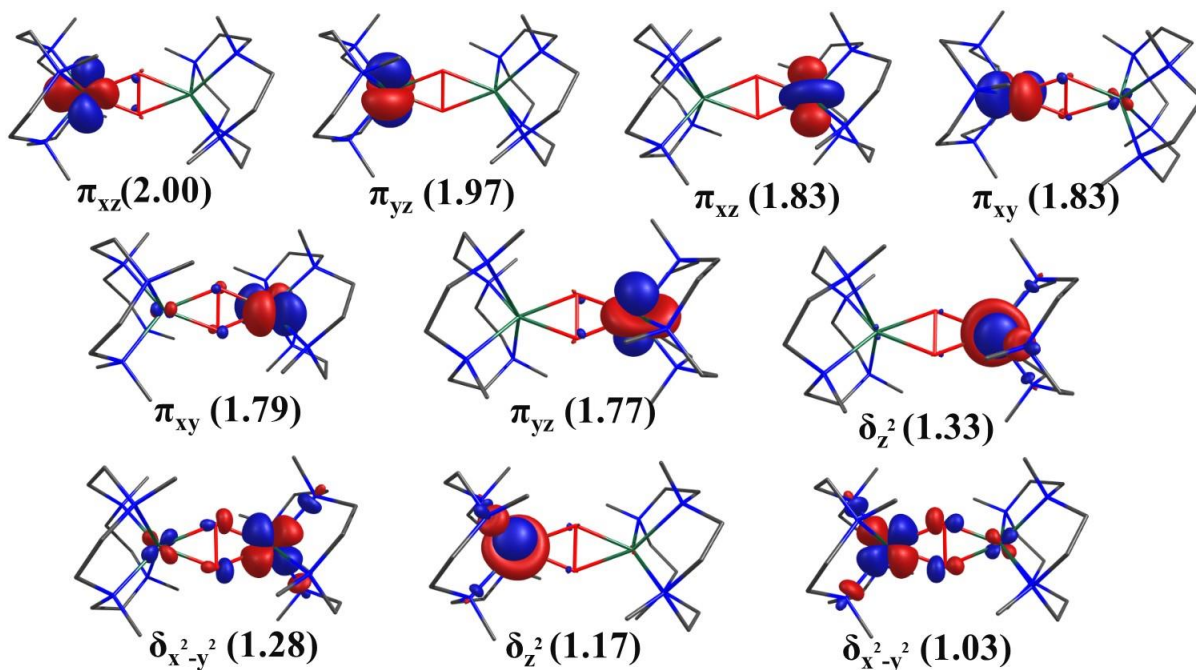

**Figure S32.** SA-CASSCF plots for the Ni orbitals for the complex **1** for active space CAS(16,10).

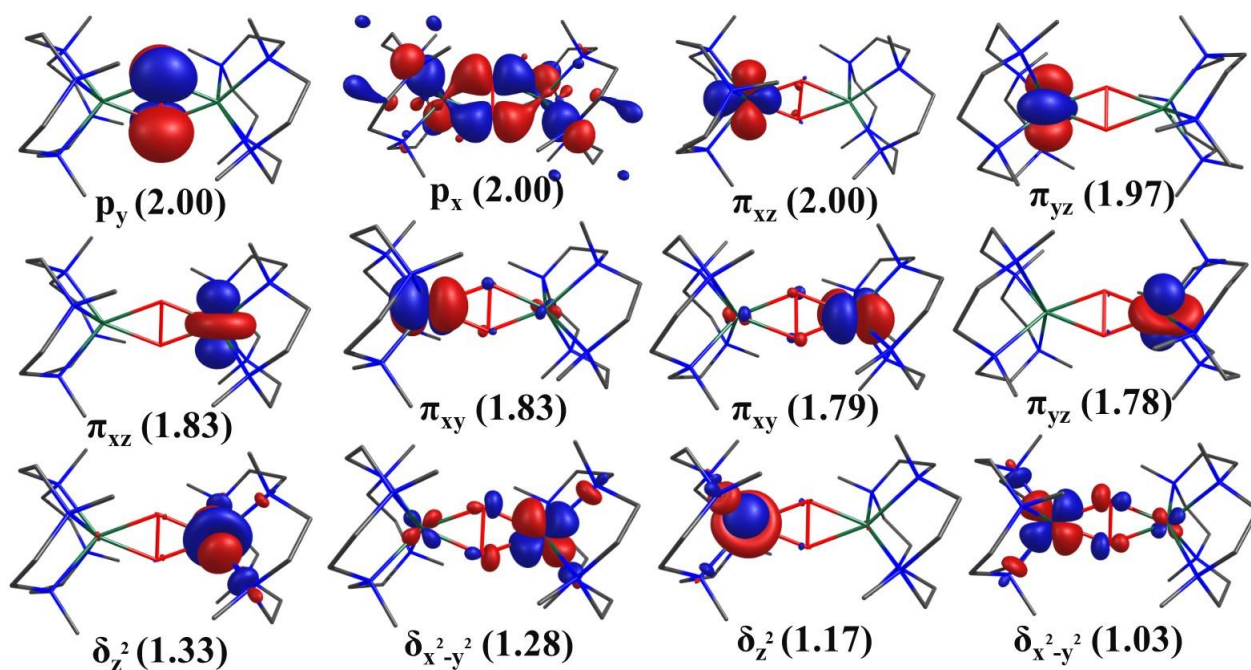

**Figure S33.** SA-CASSCF plots for the Ni and O orbitals for the complex **1** for active space CAS(20,12).



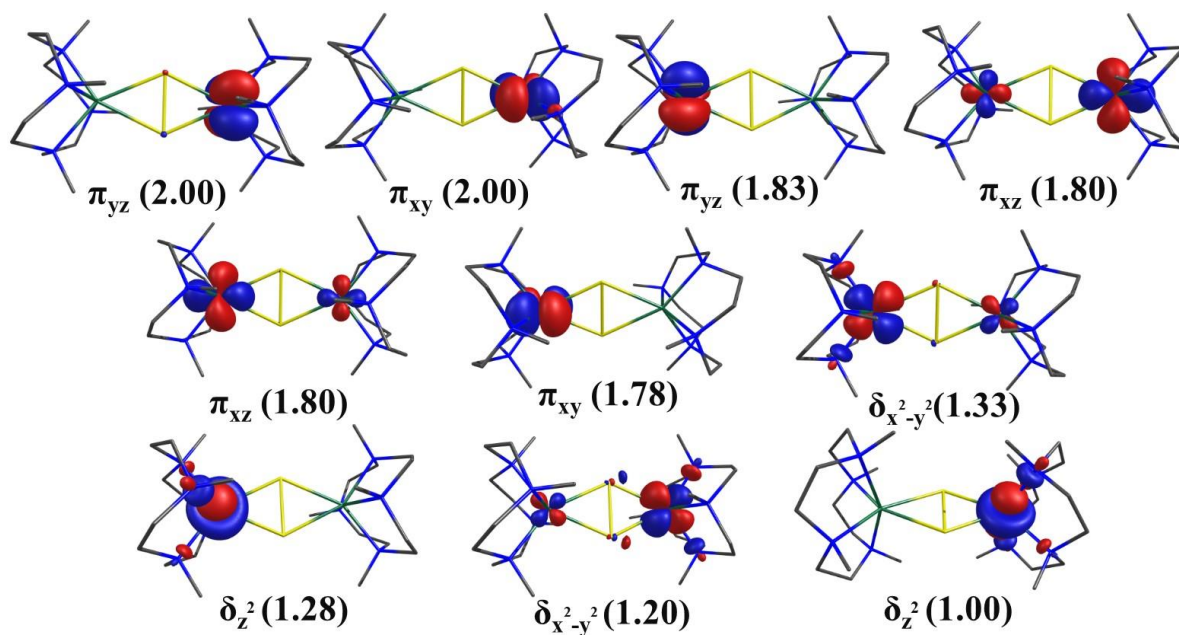

**Figure S34.** SA-CASSCF plots for the Ni orbitals for the complex **2** for active space CAS(16,10).

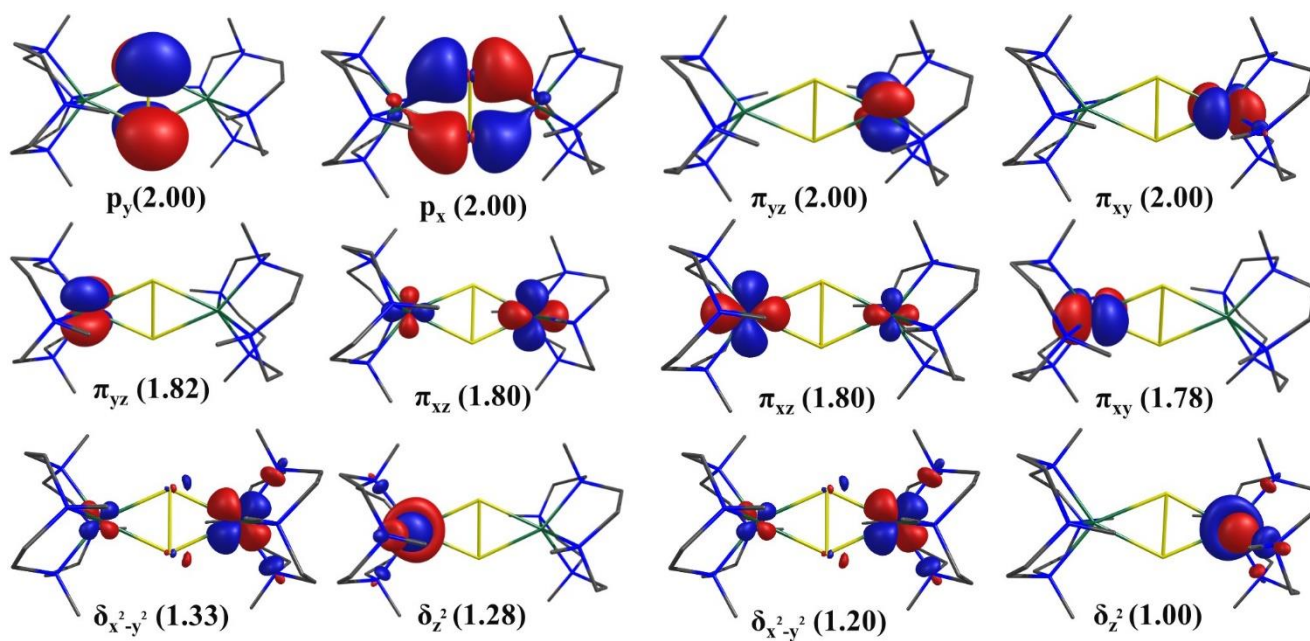

**Figure S35.** SA-CASSCF plots for the Ni and S orbitals for complex **2** for active space CAS(20,12).

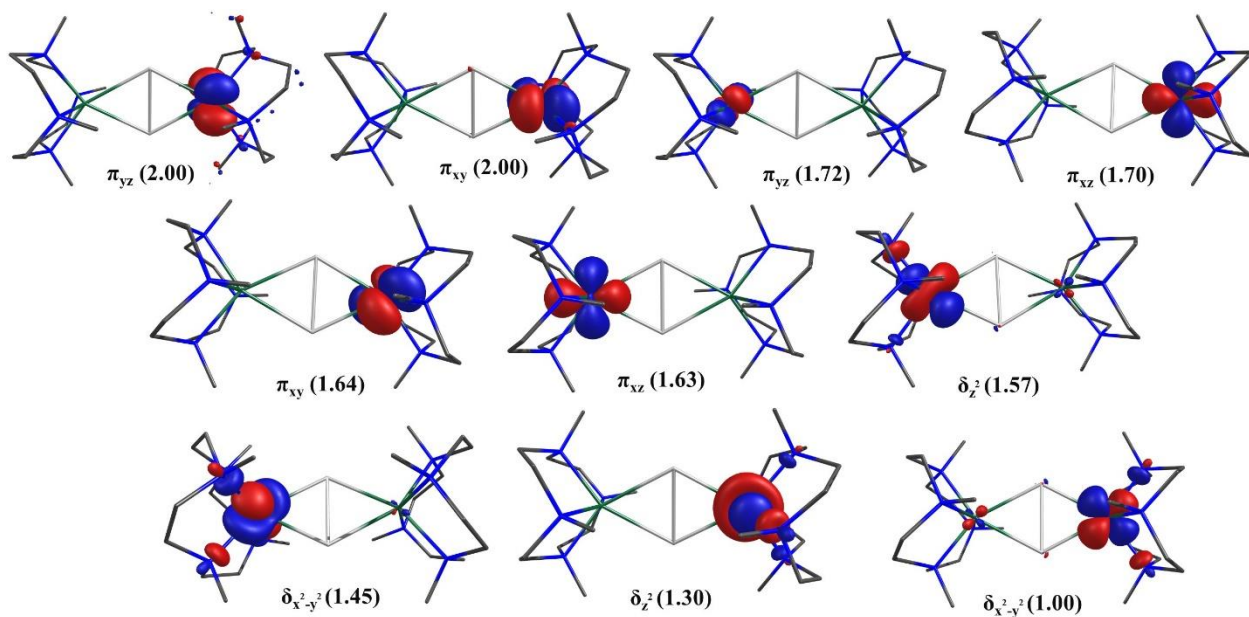

**Figure S36.** SA-CASSCF plots for the Ni orbitals for the complex **3** for active space CAS(16,10).

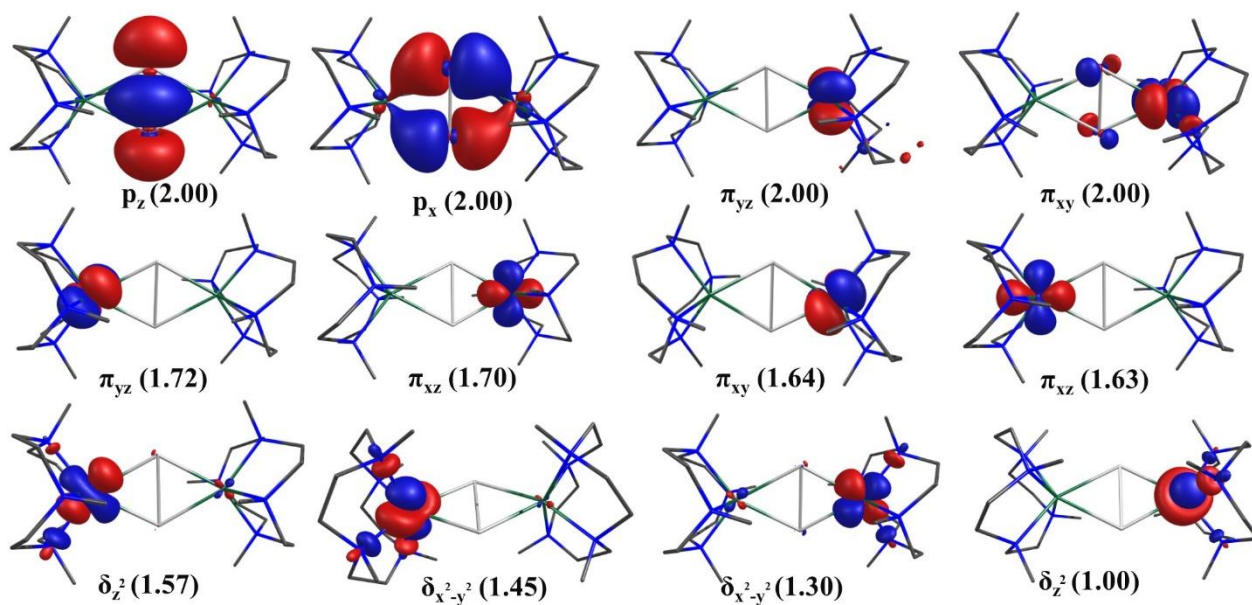

**Figure S37.** SA-CASSCF plots for the Ni and Se orbitals for complex **3** for active space CAS(20,12).

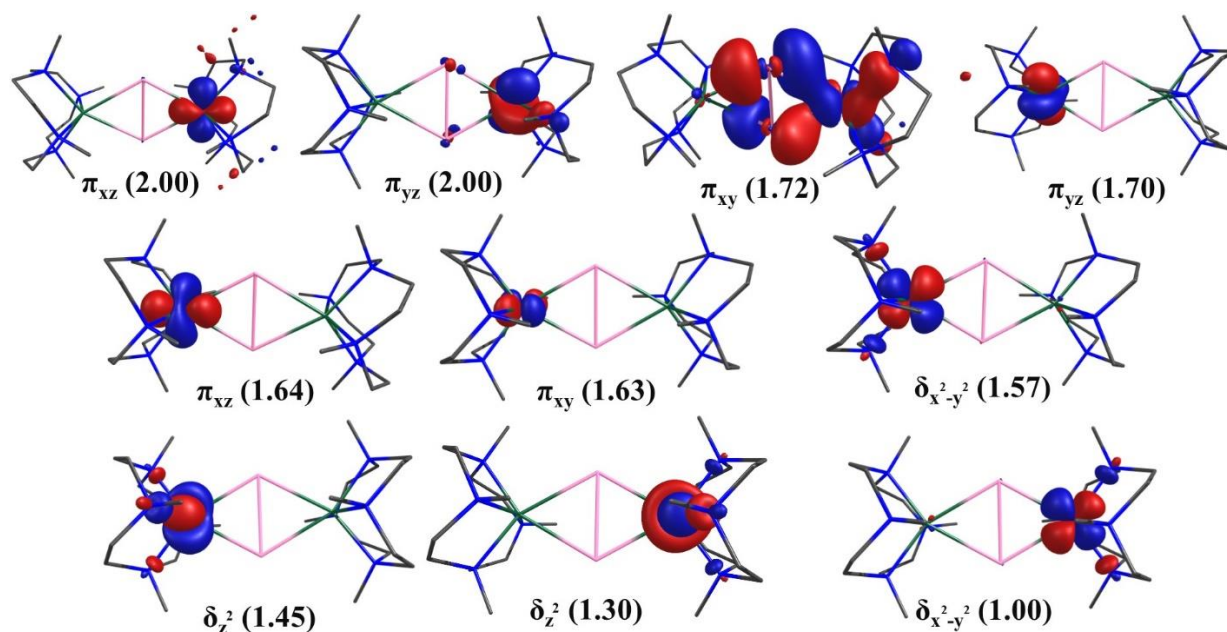

**Figure S38.** SA-CASSCF plots for the Ni orbitals for the complex **4** for active space CAS(16,10).

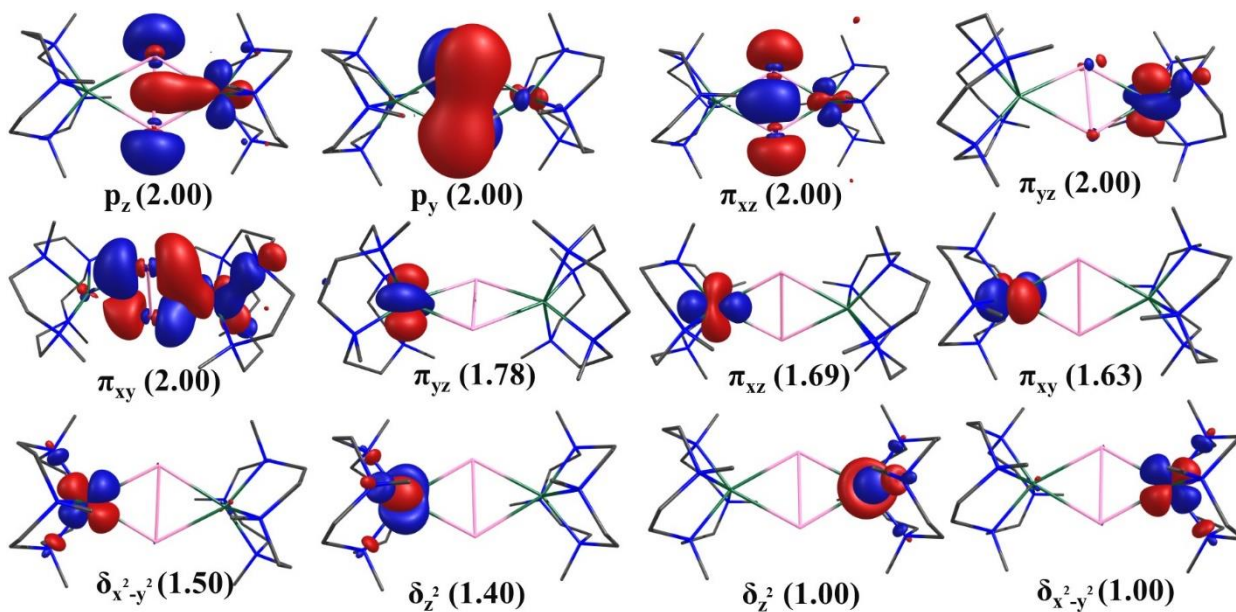

**Figure S39.** SA-CASSCF plots for the Ni and Te orbitals for the complex **4** for active space CAS(20,12).

**Table S6-** CASSCF orbitals for root0 of complexes **1-4**<sub>(t,t)</sub> for active space (16,10) and (20,12).

| CASSCF   | CAS(16,10)(root 0)                                                                                                                                                                                                                                          | CAS(20,12)(root 0)                                                                                                                                                                                                                                                            |
|----------|-------------------------------------------------------------------------------------------------------------------------------------------------------------------------------------------------------------------------------------------------------------|-------------------------------------------------------------------------------------------------------------------------------------------------------------------------------------------------------------------------------------------------------------------------------|
| <b>1</b> | $d_{xz}^2 d_{yz}^2 d_{xz}^2 d_{xy}^2 d_{xy}^2 d_{yz}^2 d_y^2 d_x^2 d_x^2 d_z^1 d_x^2 d_x^2 d_x^2$<br>(94.3%)(GS)+ $d_{xz}^2 d_{yz}^2 d_{xz}^2 d_{xy}^2 d_{xy}^2 d_{yz}^2 d_z^2 d_x^2 d_x^2$<br>$y^2 d_z^2 d_x^2 d_x^2 d_x^2$ (3.2%)(ES <sub>1</sub> )       | $p_y^2 p_x^2 d_{xz}^2 d_{yz}^2 d_{xz}^2 d_{xy}^2 d_{xy}^2 d_{yz}^2 d_z^2 d_x^2 d_x^2 d_x^2 d_z^2 d_x^2 d_x^2$<br>(94.2%)(GS)+ $p_y^2 p_x^2 d_{xz}^2 d_{yz}^2 d_{xz}^2 d_{xy}^2 d_{xy}^2 d_{yz}^2 d_z^2 d_x^2 d_x^2$<br>$y^2 d_z^2 d_x^2 d_x^2 d_x^2$ (3.3%)(ES <sub>1</sub> ) |
| <b>2</b> | $d_{yz}^2 d_{xy}^2 d_{yz}^2 d_{xz}^2 d_{xz}^2 d_{xy}^2 d_x^2 d_x^2 d_x^2 d_z^2 d_x^2 d_x^2 d_z^2$<br>(90.0%)(GS)+ $d_{yz}^2 d_{xy}^2 d_{yz}^2 d_{xz}^2 d_{xz}^2 d_{xy}^2 d_x^2 d_x^2$<br>$y^2 d_z^2 d_x^2 d_x^2 d_x^2 d_z^2$ (5.9%)(ES <sub>1</sub> )       | $p_y^2 p_x^2 d_{yz}^2 d_{xy}^2 d_{yz}^2 d_{xz}^2 d_{xz}^2 d_{xy}^2 d_x^2 d_x^2 d_x^2 d_z^2 d_x^2$<br>$y^2 d_z^2$ (90.0%)(GS)+<br>$p_y^2 p_x^2 d_{yz}^2 d_{xy}^2 d_{yz}^2 d_{xz}^2 d_{xz}^2 d_{xy}^2 d_x^2 d_x^2 d_x^2 d_z^2 d_x^2$<br>$y^2 d_z^2$ (5.8%)(ES <sub>1</sub> )    |
| <b>3</b> | $d_{yz}^2 d_{xy}^2 d_{yz}^2 d_{xz}^2 d_{xy}^2 d_{xz}^2 d_z^2 d_x^2 d_x^2 d_x^2 d_z^2 d_x^2$<br>$y^2$ (93.8%)(GS)+ $d_{yz}^2 d_{xy}^2 d_{yz}^2 d_{xz}^2 d_{xz}^2 d_{xy}^2 d_x^2 d_x^2$<br>$y^2 d_z^2 d_x^2 d_x^2 d_x^2 d_z^2$ (3.6%)(ES <sub>1</sub> )       | $P_z^2 p_x^2 d_{yz}^2 d_{xy}^2 d_{yz}^2 d_{xz}^2 d_{xy}^2 d_{xz}^2 d_z^2 d_x^2 d_x^2 d_x^2 d_z^2 d_x^2$<br>(93.8%)(GS)+ $P_z^2 p_x^2 d_{yz}^2 d_{xy}^2 d_{yz}^2 d_{xz}^2 d_{xy}^2 d_{xz}^2 d_z^2 d_x^2 d_x^2$<br>$y^2 d_z^2 d_x^2 d_x^2 d_x^2 d_z^2$ 3.6%)(ES <sub>1</sub> )  |
| <b>4</b> | $d_{xz}^2 d_{yz}^2 d_{xy}^2 d_{yz}^2 d_{xz}^2 d_{xy}^2 d_x^2 d_x^2 d_x^2 d_z^2 d_z^2 d_x^2 d_x^2$<br>$y^2$ (88.9%)(GS)+ $d_{xz}^2 d_{yz}^2 d_{xy}^2 d_{yz}^2 d_{xz}^2 d_{xy}^2 d_x^2 d_x^2$<br>$y^2 d_z^2 d_z^2 d_x^2 d_x^2 d_x^2$ (7.1%)(ES <sub>1</sub> ) | $P_z^2 p_y^2 d_{xz}^2 d_{yz}^2 d_{xy}^2 d_{yz}^2 d_{xz}^2 d_{xy}^2 d_x^2 d_x^2 d_x^2 d_z^2 d_z^2 d_x^2$<br>$y^2$ (88.9%)(GS)+ $P_z^2 p_y^2 d_{xz}^2 d_{yz}^2 d_{xy}^2 d_{yz}^2 d_{xz}^2 d_{xy}^2 d_x^2 d_x^2$<br>$y^2 d_z^2 d_z^2 d_x^2 d_x^2 d_x^2$ (7.1%)(ES <sub>1</sub> ) |

**Table S7-** Overlap integral for the ground state of complexes  $^1\mathbf{1-4}_{(t,t)}$ .

| $^1\mathbf{1}_{t,t}$               |         |               |
|------------------------------------|---------|---------------|
| Ni <sup>II</sup> /Ni <sup>II</sup> | $d_z^2$ | $d_{x^2-y^2}$ |
| $d_z^2$                            | 0.06    | 0.00          |
| $d_{x^2-y^2}$                      | 0.00    | 0.44          |
| $^1\mathbf{2}_{t,t}$               |         |               |
| Ni <sup>II</sup> /Ni <sup>II</sup> | $d_z^2$ | $d_{x^2-y^2}$ |
| $d_z^2$                            | 0.05    | 0.07          |
| $d_{x^2-y^2}$                      | 0.07    | -0.32         |
| $^1\mathbf{3}_{t,t}$               |         |               |
| Ni <sup>II</sup> /Ni <sup>II</sup> | $d_z^2$ | $d_{x^2-y^2}$ |
| $d_z^2$                            | -0.27   | 0.01          |
| $d_{x^2-y^2}$                      | 0.01    | 0.97          |
| $^1\mathbf{4}_{t,t}$               |         |               |
| Ni <sup>II</sup> /Ni <sup>II</sup> | $d_z^2$ | $d_{x^2-y^2}$ |
| $d_z^2$                            | 0.52    | -0.01         |
| $d_{x^2-y^2}$                      | -0.01   | 0.66          |

**Table S8-** Previous literature on compounds containing O, S, Se, and Te ligands.

| Species                                                                                                                                                                                                                                                          | Condition           | Result                                                                                                                                                   | Energy Barrier                      | Citation       |
|------------------------------------------------------------------------------------------------------------------------------------------------------------------------------------------------------------------------------------------------------------------|---------------------|----------------------------------------------------------------------------------------------------------------------------------------------------------|-------------------------------------|----------------|
| Co(ClO <sub>4</sub> ) <sub>2</sub> • 6MeCN + 2 [14]aneN <sub>4</sub> + 2 NaSH = C <sub>20</sub> H <sub>18</sub> N <sub>2</sub> Ni <sub>2</sub> S <sub>2</sub> <sup>2+</sup> •2(ClO <sub>4</sub> <sup>1-</sup> )•2(C <sub>2</sub> H <sub>3</sub> N <sub>1</sub> ) | 16-hour, Room Temp. | hydrogenation of a π bond (diazo benzene to di phenyl hydrazine product)                                                                                 | -                                   | <sup>10</sup>  |
| [{(η <sup>5</sup> -C <sub>5</sub> H <sub>4</sub> Me)Mo} <sub>2</sub> (μ-SH)(μ-SCH <sub>3</sub> )(S <sub>2</sub> CH <sub>2</sub> )]                                                                                                                               | 20-60 °C            | hydrogenation of unsaturated organic compounds                                                                                                           | Found BDE(S-H) less than 90kcal/mol | <sup>11</sup>  |
| [(triphos)Niμ-S <sub>2</sub> )Ni(triphos)]ClO <sub>4</sub>                                                                                                                                                                                                       | 22 °C               | S = 1/2 spin system with g± = 2.0 and = 2.18                                                                                                             | -                                   | <sup>6</sup>   |
| [{(triphos)M} <sub>2</sub> (μ-η <sup>2</sup> -Te <sub>2</sub> )] <sub>2</sub> C <sub>4</sub> H <sub>8</sub> O                                                                                                                                                    | 60 °C for 3 h       | Crystal structure formed                                                                                                                                 | -                                   | <sup>9</sup>   |
| [{(Ni(Me <sub>4</sub> [12]aneN <sub>4</sub> )) <sub>2</sub> (μ-η <sup>2</sup> :η <sup>2</sup> -Se <sub>2</sub> )}](PF <sub>6</sub> ) <sub>2</sub>                                                                                                                | 55 °C, overnight    | DHA to anthracene                                                                                                                                        | BDE(Se-H) bond = 80kcal/mol         | <sup>7</sup>   |
| [(PhTtBu)Ni] <sub>2</sub> (μ-η <sup>2</sup> :η <sup>2</sup> -S <sub>2</sub> )                                                                                                                                                                                    | -                   | Centrosymmetric, antiferromagnetically coupled, J = -487cm <sup>-1</sup><br>Reactant with O <sub>2</sub> and forms Ni <sub>2</sub> (μ-S) type complexes. | -                                   | <sup>4</sup>   |
| [Cp* <sub>2</sub> Co][Cp'Ni <sub>2</sub> E <sub>2</sub> ] E = S, Se, Te                                                                                                                                                                                          | 100 K               | Devison of Dichalcogenide, Subchalcogenide, chalcogenides. 1-3 complex falls in subchalcogenide category                                                 | -                                   | <sup>12</sup>  |
| LnNi <sub>2</sub> (η <sup>2</sup> , η <sup>2</sup> -S <sub>2</sub> ) <sub>2</sub> , LnNi <sub>2</sub> (μ-1,2-S <sub>2</sub> ) <sub>3</sub>                                                                                                                       | -                   | Three types of bonding modes of Sulphur ligand                                                                                                           | -                                   | <sup>13</sup>  |
| butterfly like [NiII <sub>2</sub> (μ-η <sup>2</sup> :η <sup>2</sup> -S <sub>2</sub> )] complex                                                                                                                                                                   | -                   | Smaller activated S-S bond length.                                                                                                                       | -                                   | <sup>14</sup>  |
| [Ni <sup>II</sup> <sub>2</sub> (Me <sub>n</sub> TPA) <sub>2</sub> (μ-η <sup>2</sup> :η <sup>2</sup> -S <sub>2</sub> )](ClO <sub>4</sub> ) <sub>2</sub>                                                                                                           | -                   | reactivity of these complexes is controlled by the steric effects as well as the electron donor ability of the supporting ligands                        | -                                   | <sup>15</sup>  |
| Facile Dissociation of [(LNiII) <sub>2</sub> E <sub>2</sub> ] (E=Se,Te)                                                                                                                                                                                          | -                   | Dichalcogenides: Evidence for [LNiIIE <sub>2</sub> ] Superselenides and Supertellurides in Solution                                                      | -                                   | <sup>8,8</sup> |
| {(IPr)CINi} <sub>2</sub> (μ <sub>2</sub> -η <sup>2</sup> , η <sup>2</sup> -S <sub>2</sub> )                                                                                                                                                                      | -                   | Also, form Ni-Ni bonded bridging sulfide type species.                                                                                                   | -                                   | <sup>16</sup>  |
| {[Ni(tmc)] <sub>2</sub> (μ-O <sub>2</sub> )}(OTf) <sub>2</sub>                                                                                                                                                                                                   | -                   | DFT favored end on over side on type species                                                                                                             | -                                   | <sup>17</sup>  |

**Table S9-** Steric energies (in kJ/mol), ΔE<sub>strain</sub> energy for lowest and first excited state of *tsI* for all complexes **1-4**.

| First hydrogen atom transfer                        | ΔE <sub>strain</sub> (in kJ/mol) | ΔE <sub>steric</sub> (in kJ/mol) | First hydrogen atom transfer                        | ΔE <sub>int</sub> (in kJ/mol) | ΔE <sub>strain</sub> (in kJ/mol) |
|-----------------------------------------------------|----------------------------------|----------------------------------|-----------------------------------------------------|-------------------------------|----------------------------------|
| <b>1</b> - <sup>5</sup> <i>tsI</i> <sub>(t,t)</sub> | -67.0                            | 70.5                             | <b>1</b> - <sup>1</sup> <i>tsI</i> <sub>(t,t)</sub> | 10.2                          | 75.4                             |
| <b>2</b> - <sup>1</sup> <i>tsI</i> <sub>(t,t)</sub> | -101.7                           | 271.9                            | <b>2</b> - <sup>5</sup> <i>tsI</i> <sub>(t,t)</sub> | -3.14                         | 306.9                            |
| <b>3</b> - <sup>5</sup> <i>tsI</i> <sub>(t,t)</sub> | -104.2                           | 248.9                            | <b>3</b> - <sup>1</sup> <i>tsI</i> <sub>(t,t)</sub> | -220.0                        | 250.5                            |
| <b>4</b> - <sup>5</sup> <i>tsI</i> <sub>(t,t)</sub> | -112.7                           | 277.9                            | <b>4</b> - <sup>1</sup> <i>tsI</i> <sub>(t,t)</sub> | -120.9                        | 225.3                            |

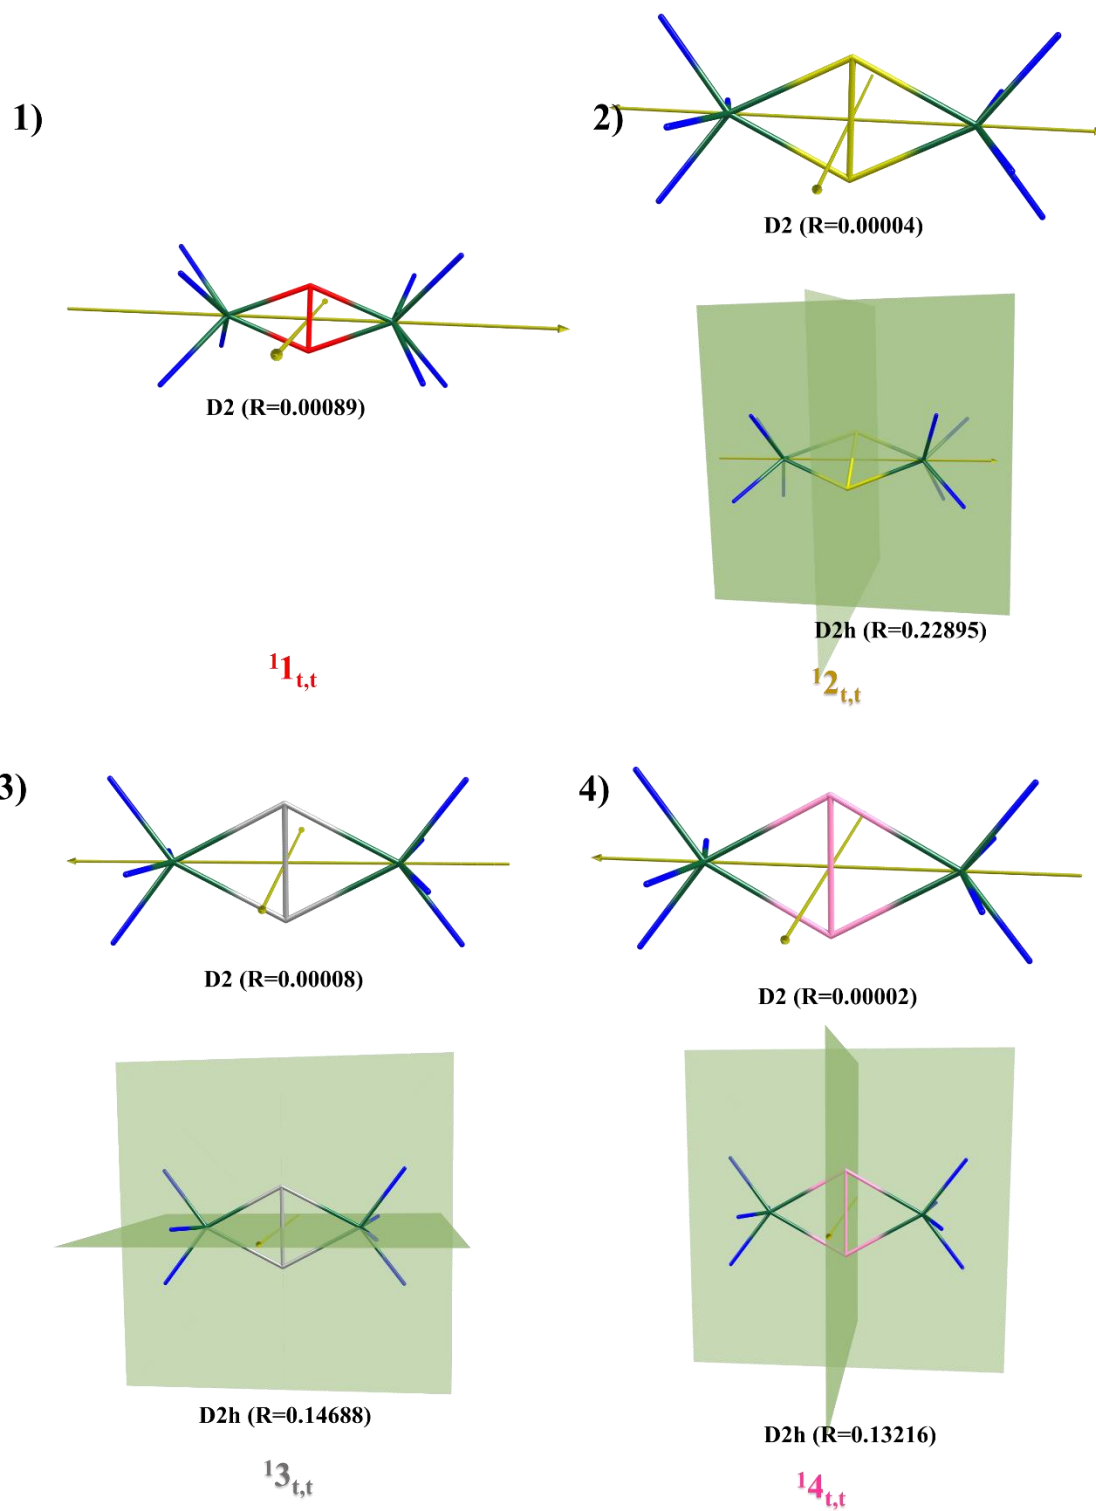

**Figure S40.** The symmetry measures of all four complexes (1-4) showed a minute deviations from D2h, ranging between 0.11-0.22 (plotted by Chemcraft software).

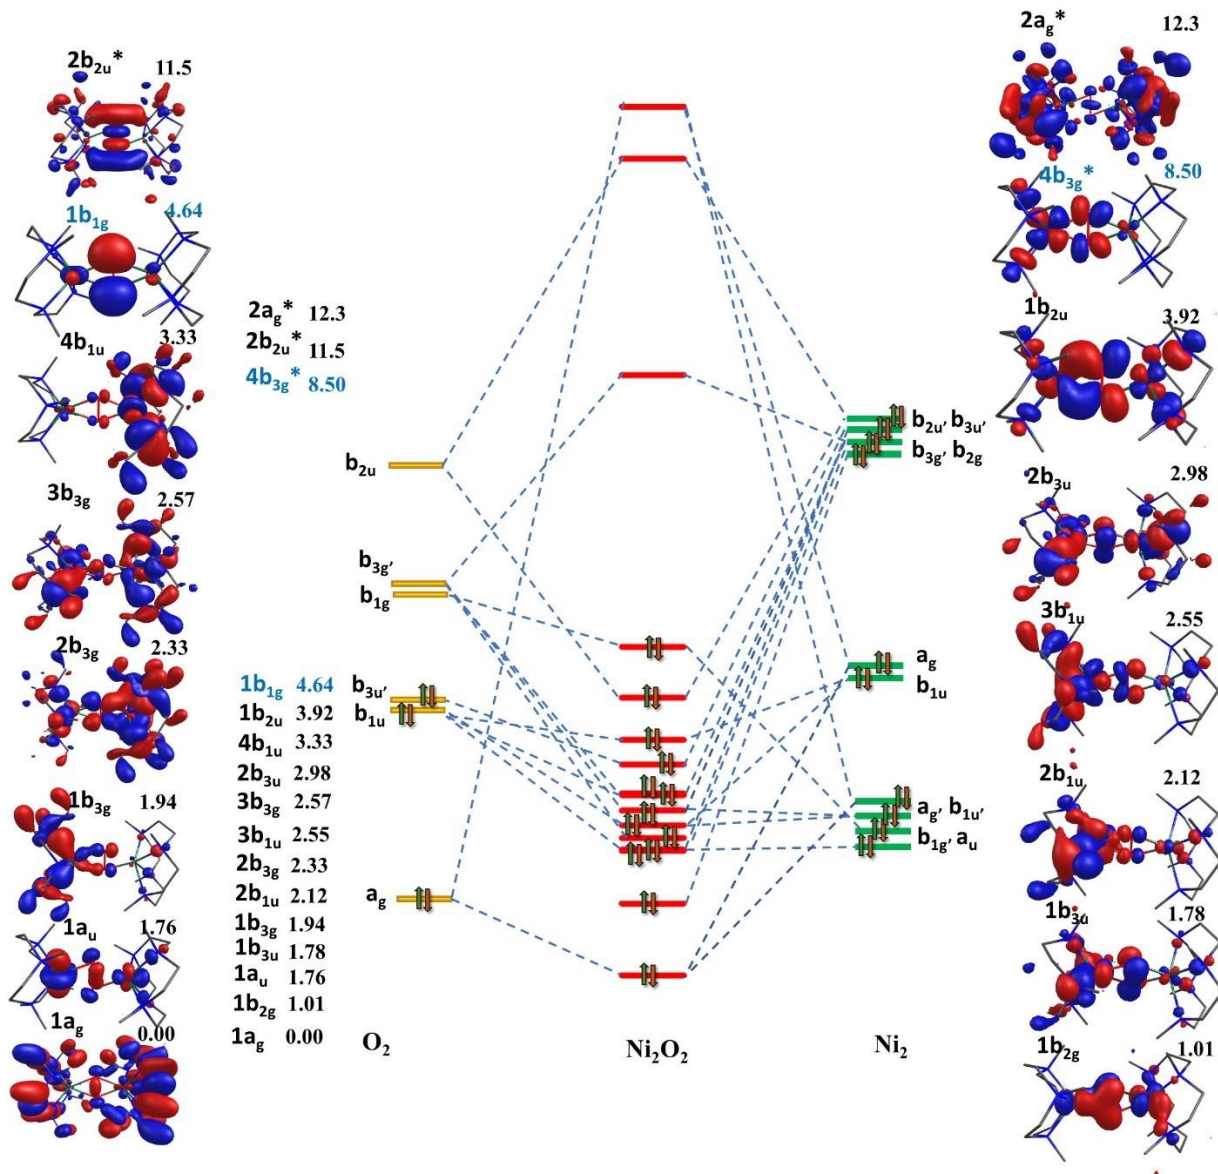

**Figure S41.** The qualitative molecular orbital diagram for complex  $^1\mathbf{1}_{(t,t)}$ . Here HOMO-LUMO energy written in blue color code.

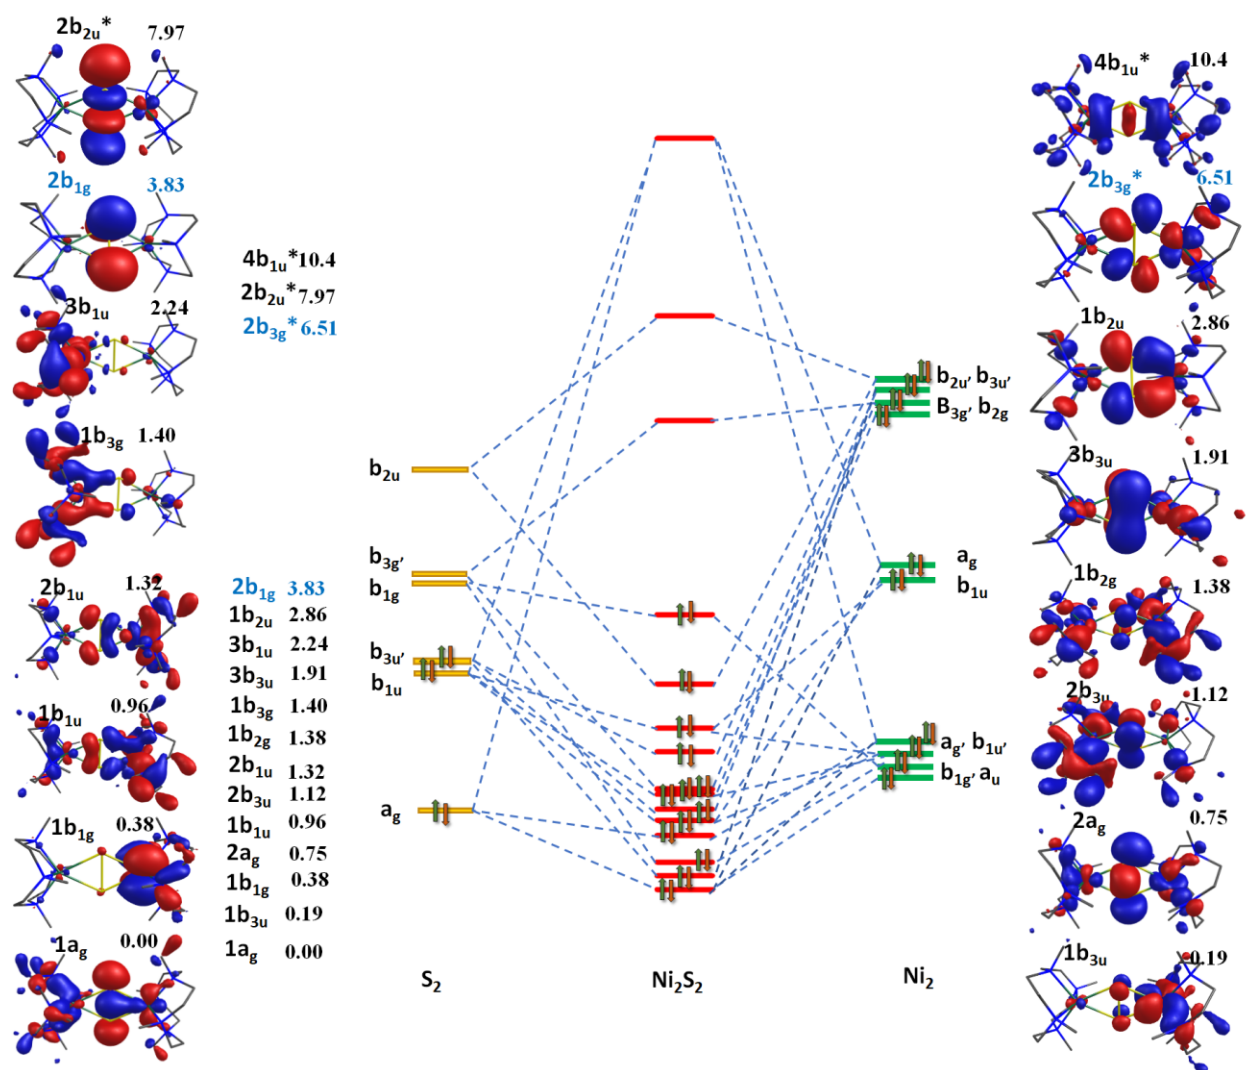

**Figure S42.** The qualitative molecular orbital diagram for complex  ${}^12_{(t,t)}$ . Here HOMO-LUMO energy written in blue color code.



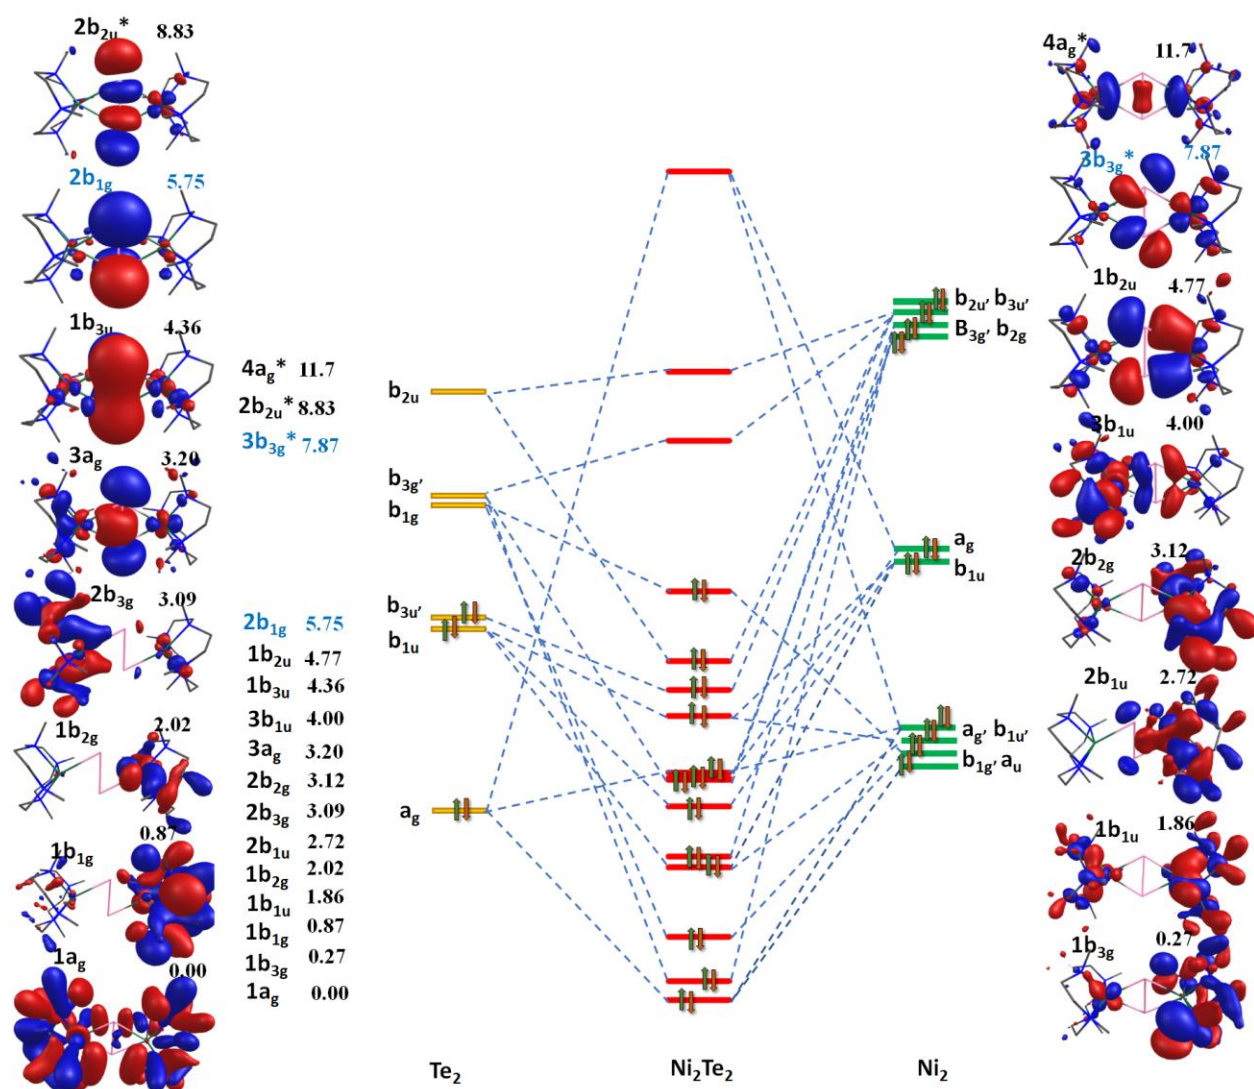

**Figure S43.** The qualitative molecular orbital diagram for complex  $14_{(t,t)}$ . Here HOMO-LUMO energy written in blue color code.

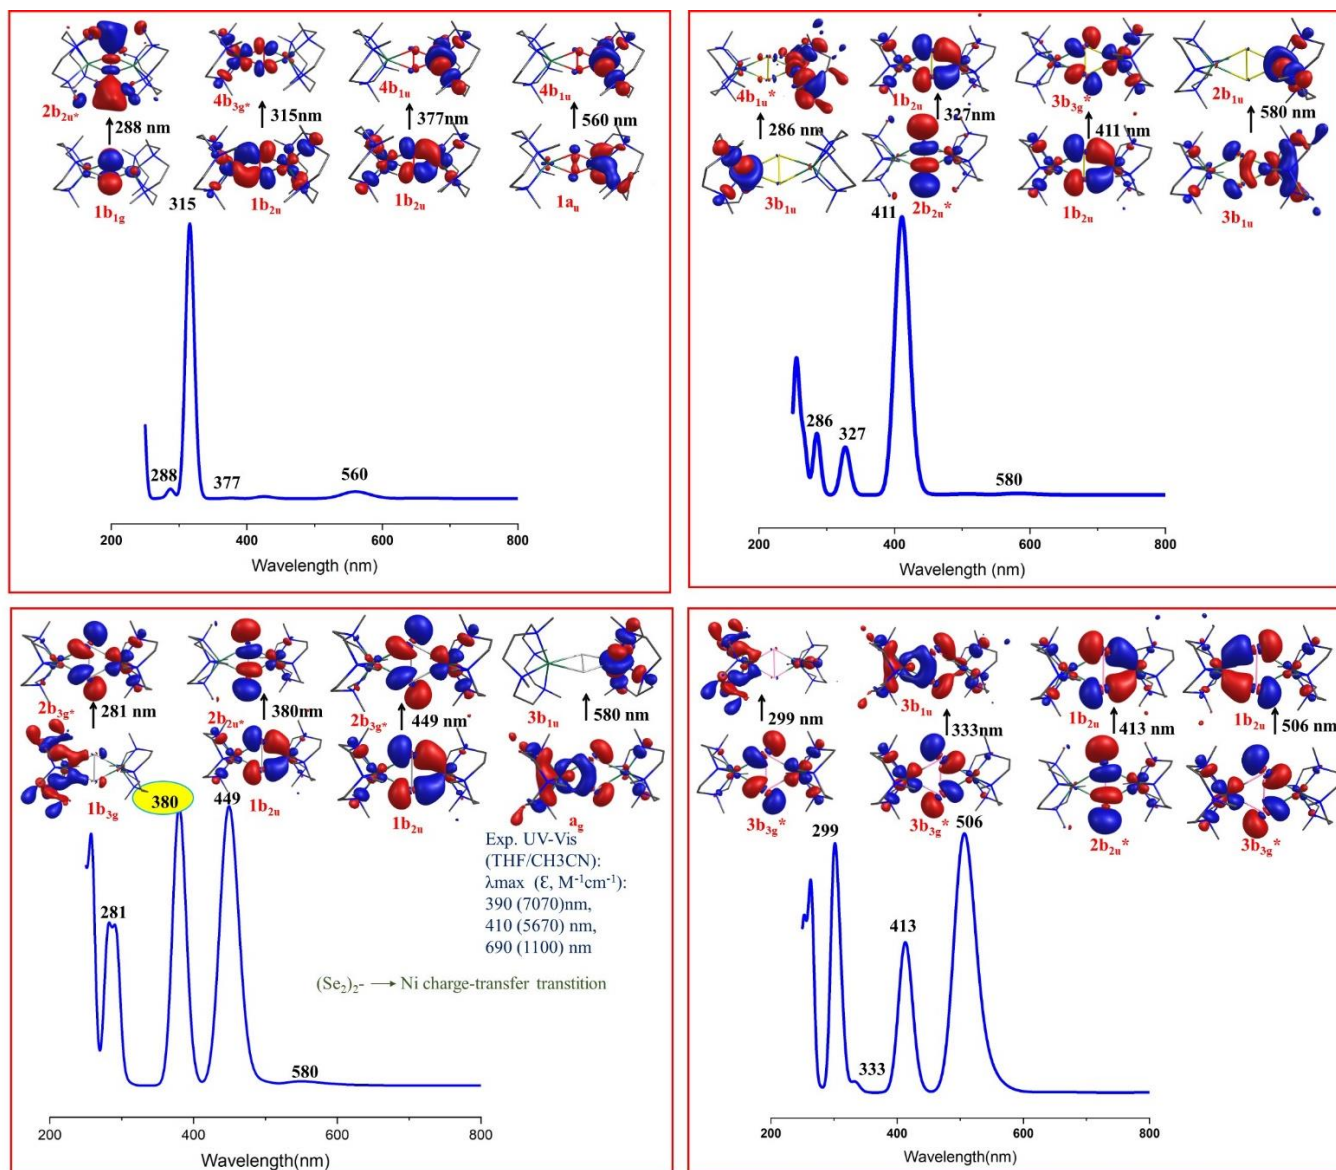

**Figure S44.** Electronic absorption spectra of ground state  $^1R_{(t,t)}$ (A) Complex 1, (B) Complex 2, (C) Complex 3, (D) Complex 4.

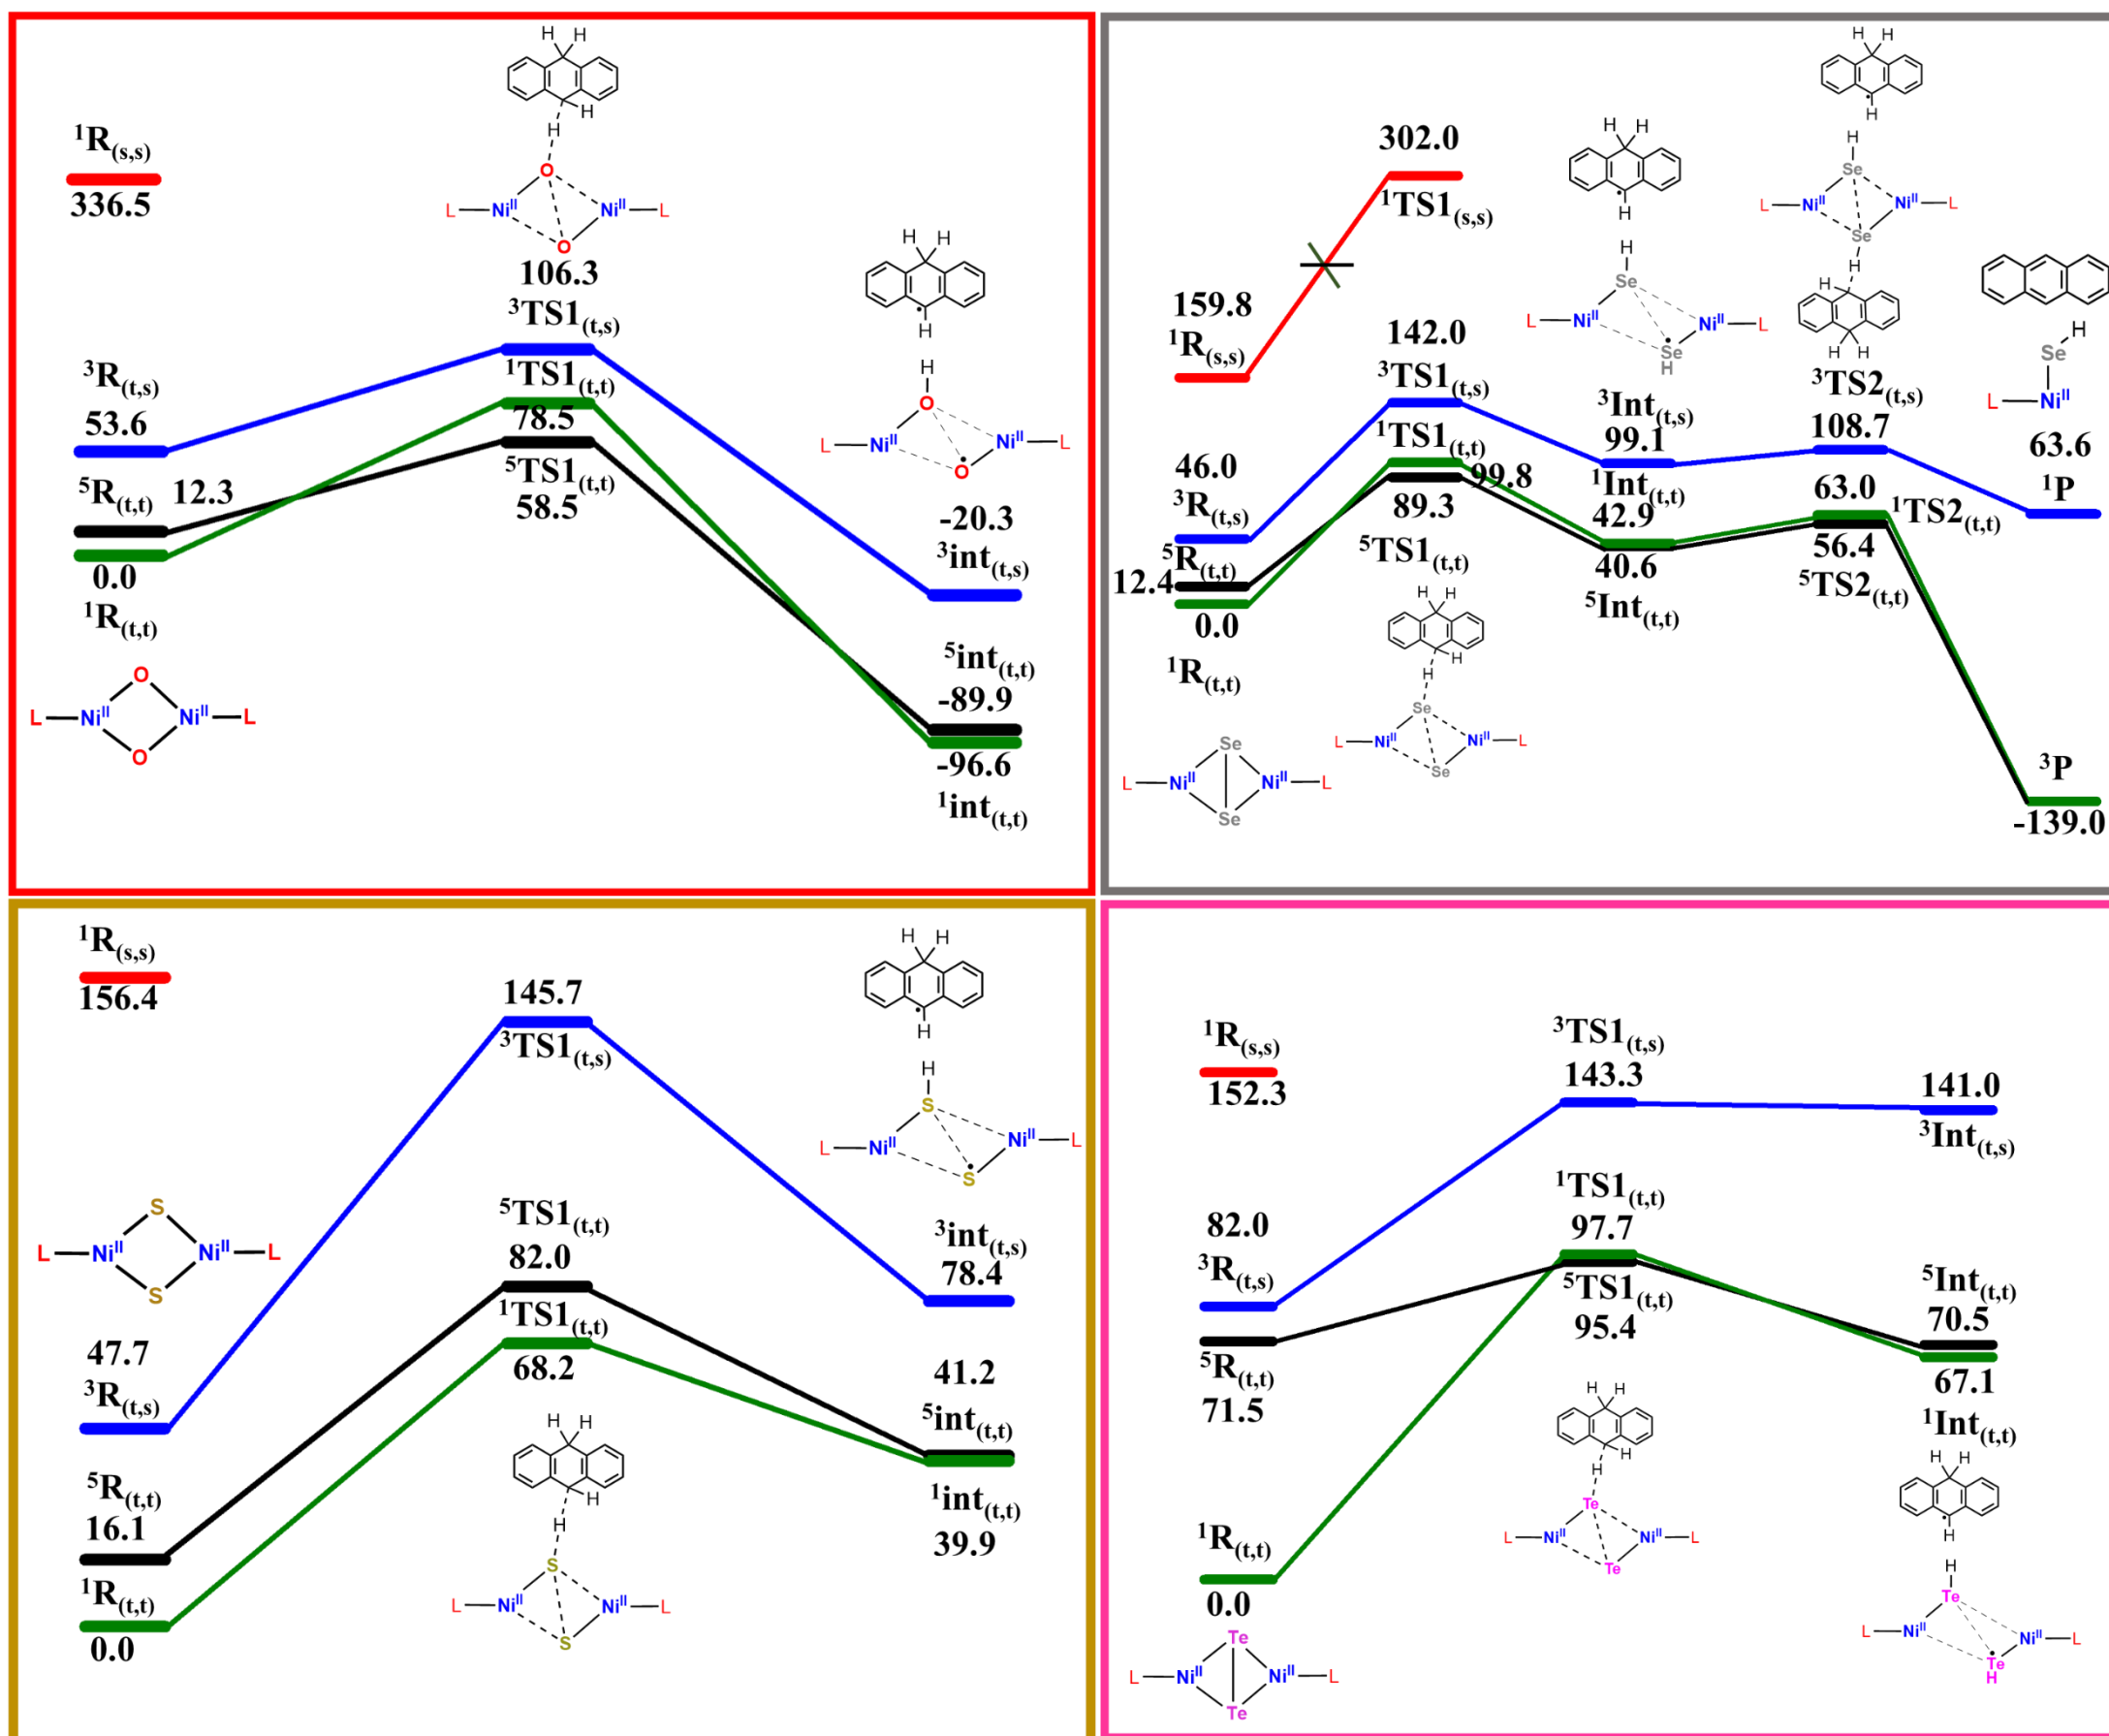

Figure S45. Computed potential energy surface for the C-H bond activation by complexes (a) 1, (b) 2, (c) 3 and (d) 4 (kJ/mol)

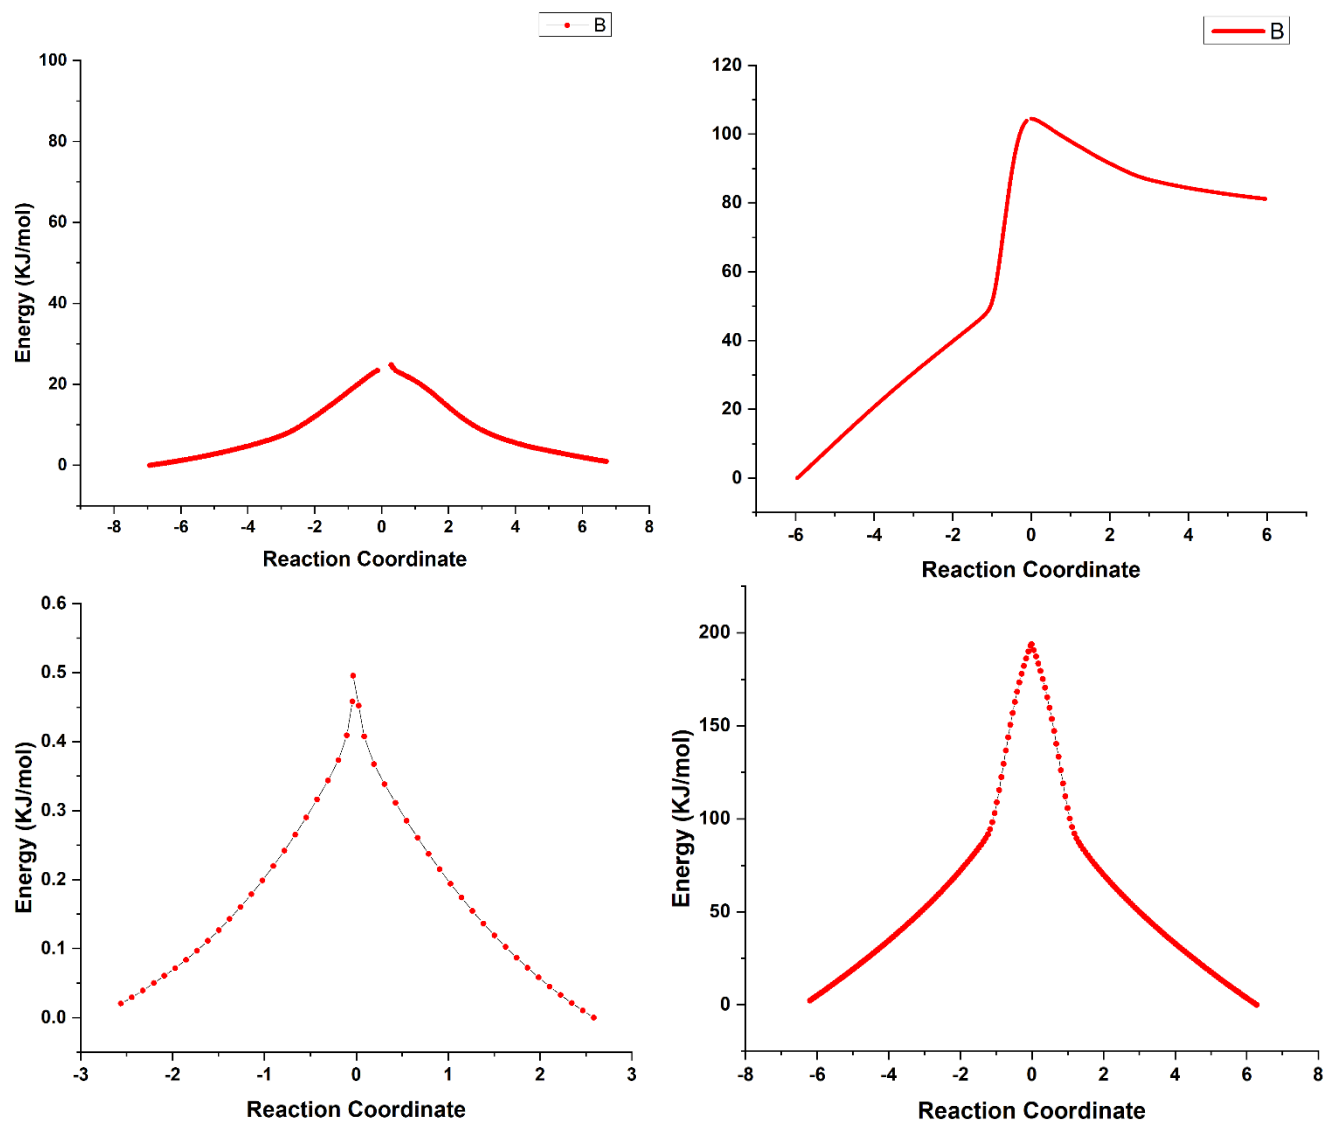

**Figure S46.** IRC plots for the first hydrogen abstraction transition state (*ts1*) for complex **3**.

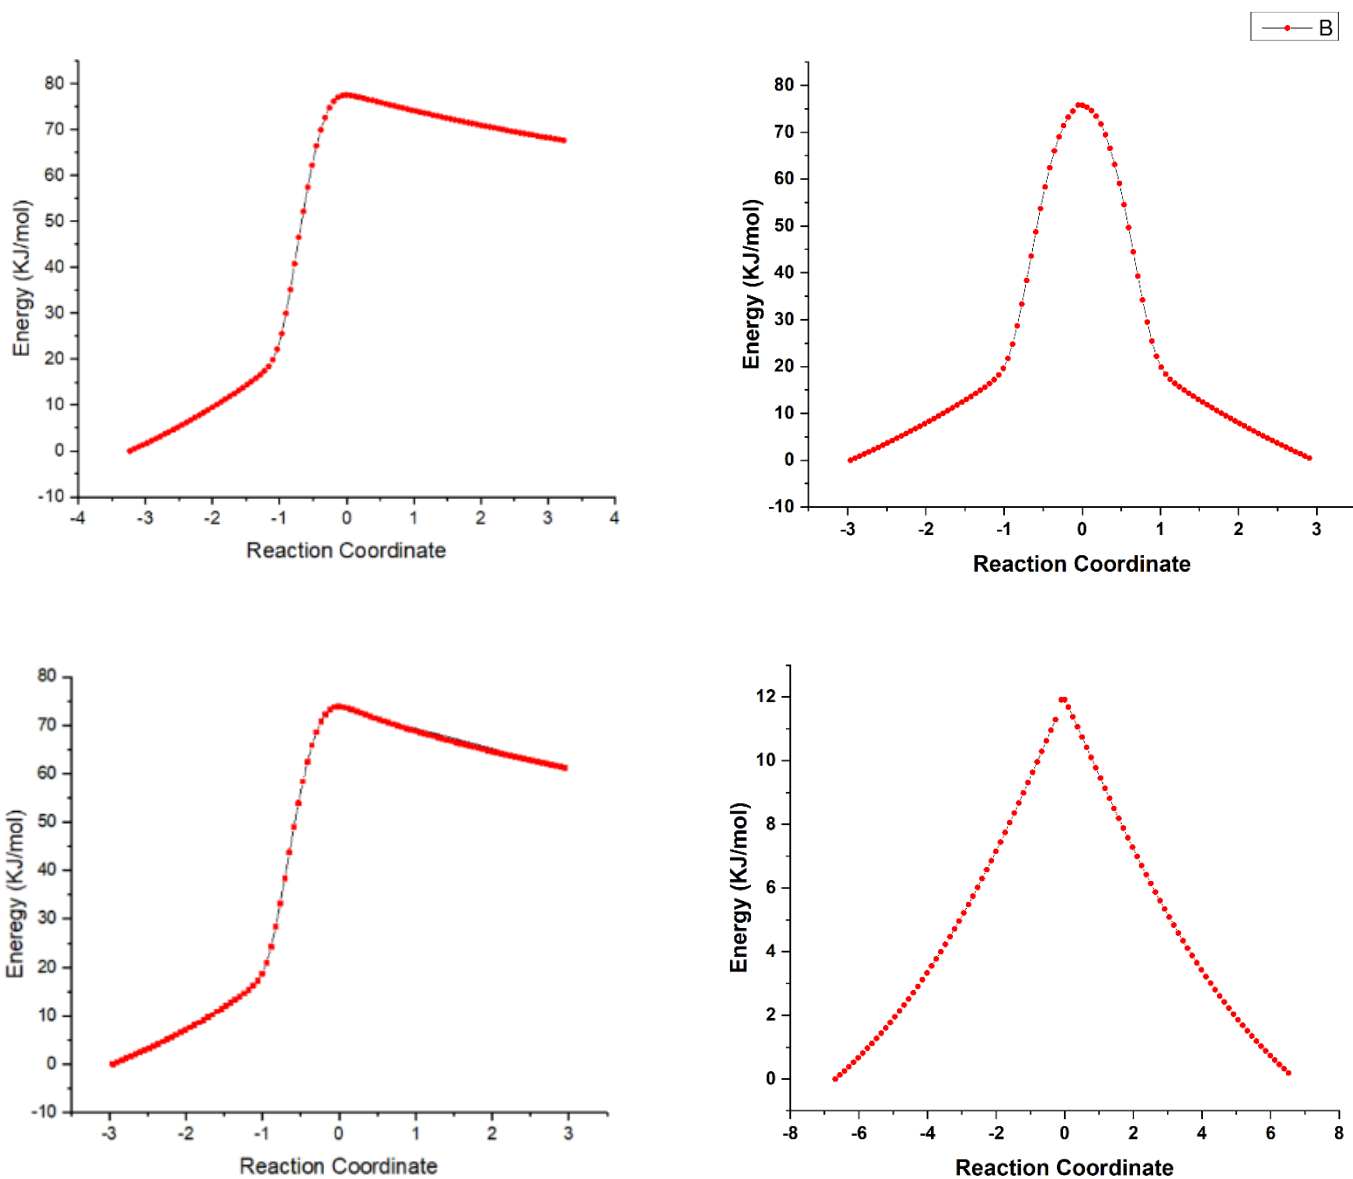

**Figure S47.** IRC plots for the second hydrogen abstraction transition state (*ts2*) for complex **3**.

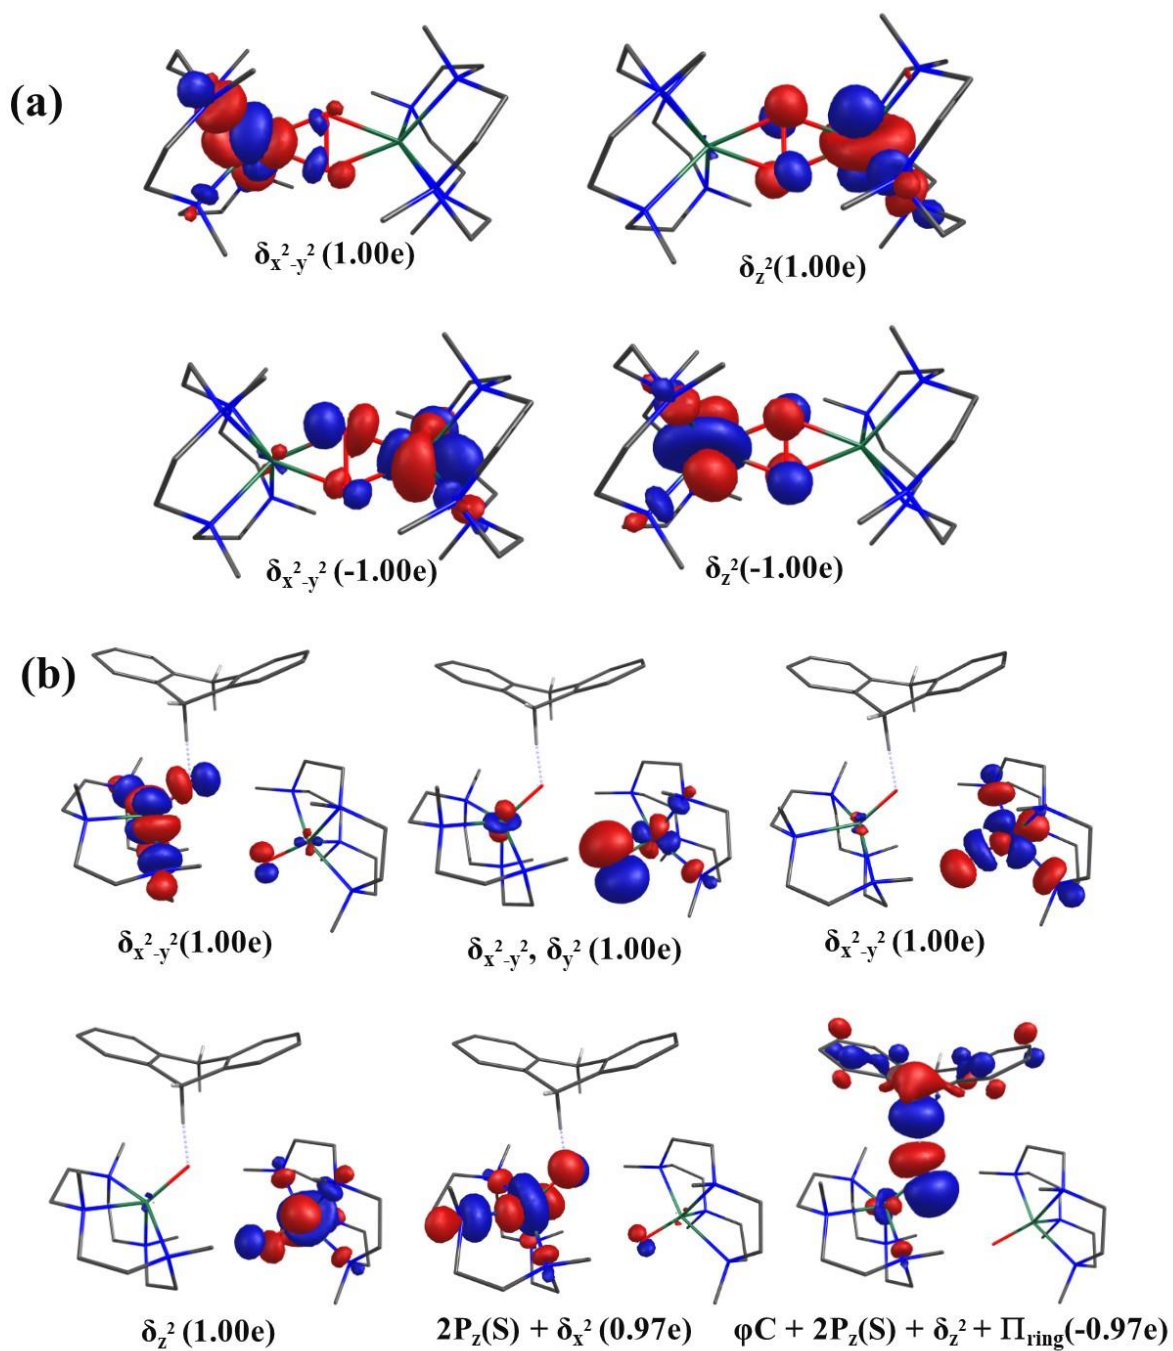

**Figure S48.** Spin natural orbitals and their occupations (noted in parenthesis) for complex **1** (a)  ${}^1R_{(t,t)}$  (top panel) and (b)  ${}^5tsI_{(t,t)}$  (bottom panel).

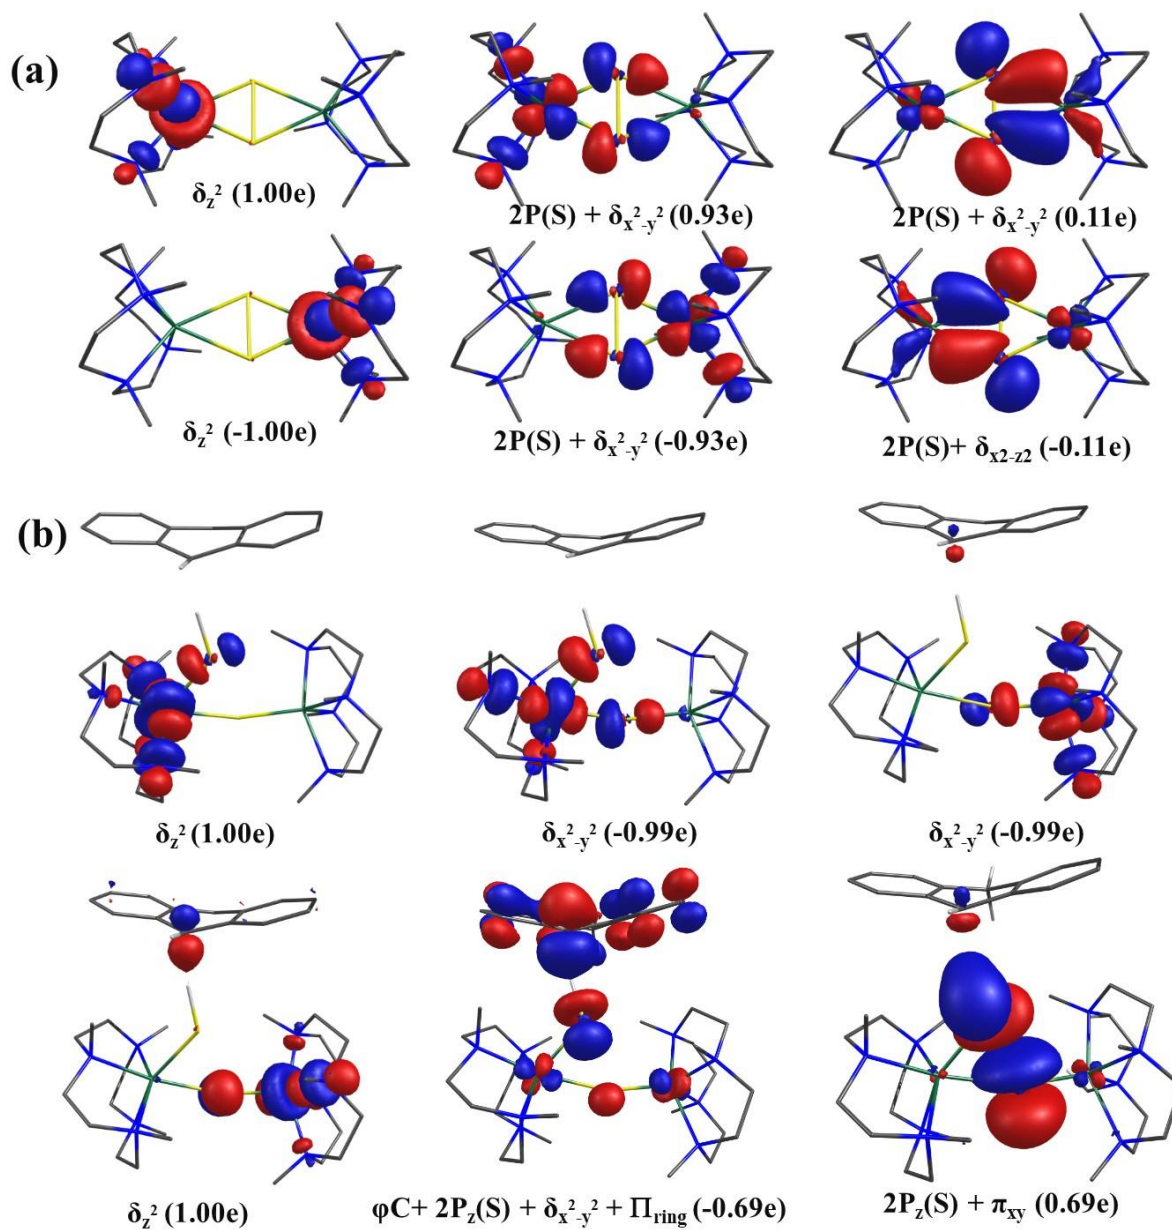

**Figure S49.** Spin natural orbitals and their occupations (noted in parenthesis) of Complex 2 (a)  ${}^1R_{(t,t)}$  (top panel) and (b)  ${}^1tsI_{(t,t)}$  (bottom panel).

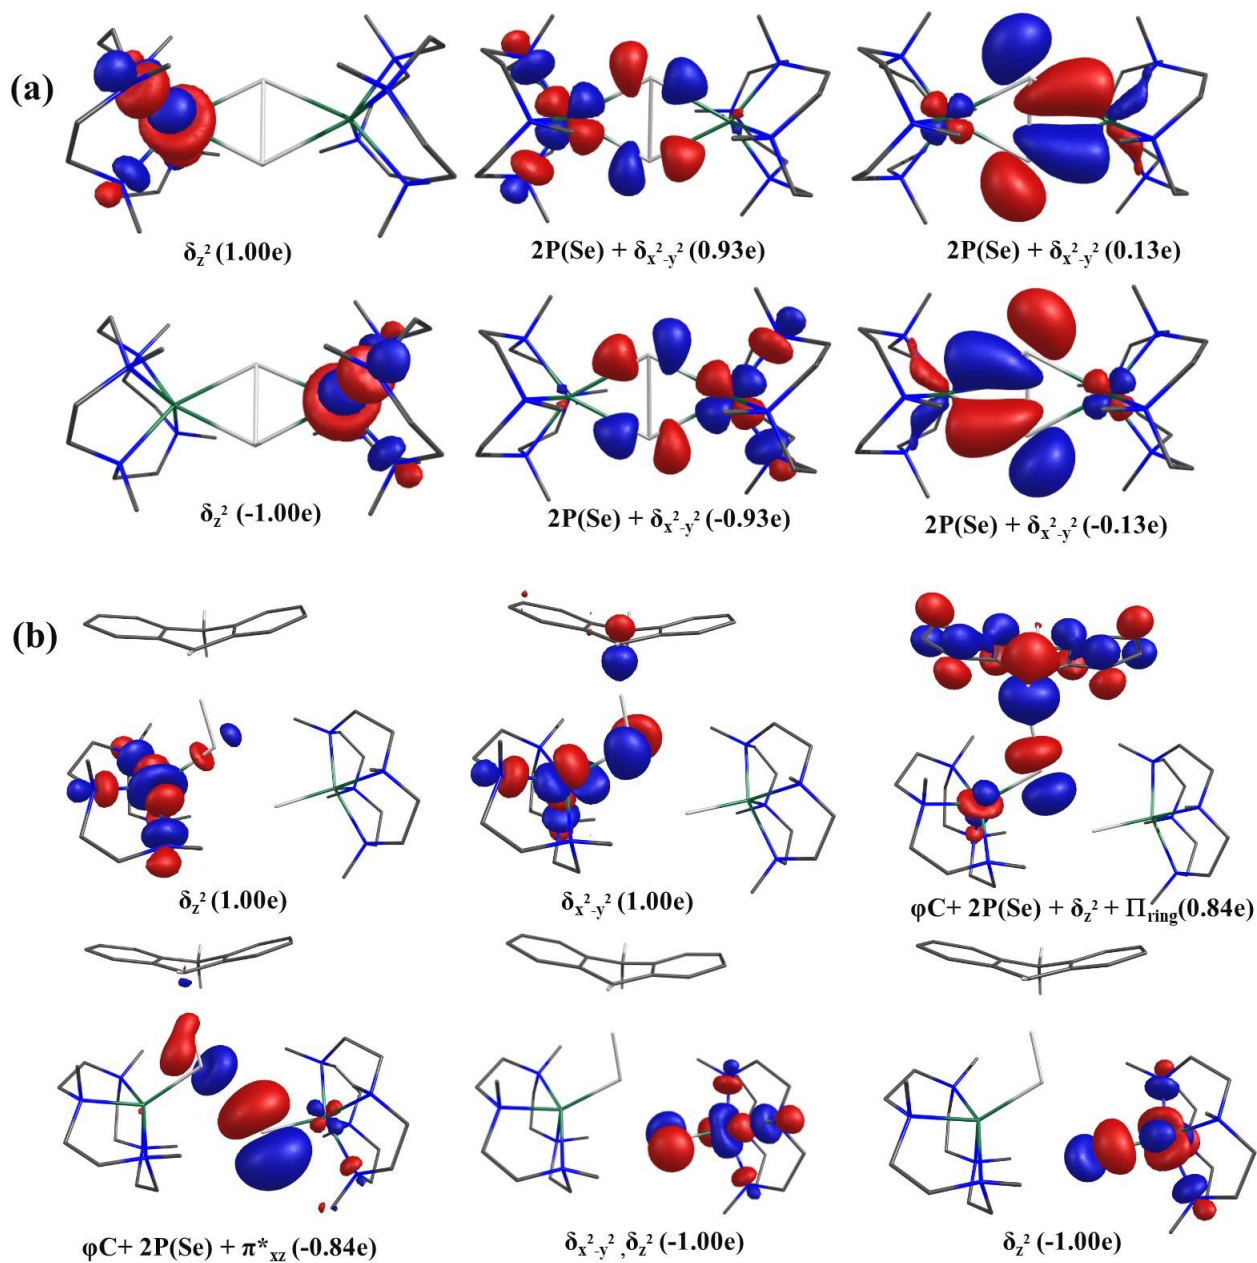

**Figure S50.** Spin natural orbitals and their occupations (noted in parenthesis) of Complex **3** (a)  $^1R_{(t,t)}$  (top panel) and (b)  $^5tsI_{(t,t)}$  (bottom panel).



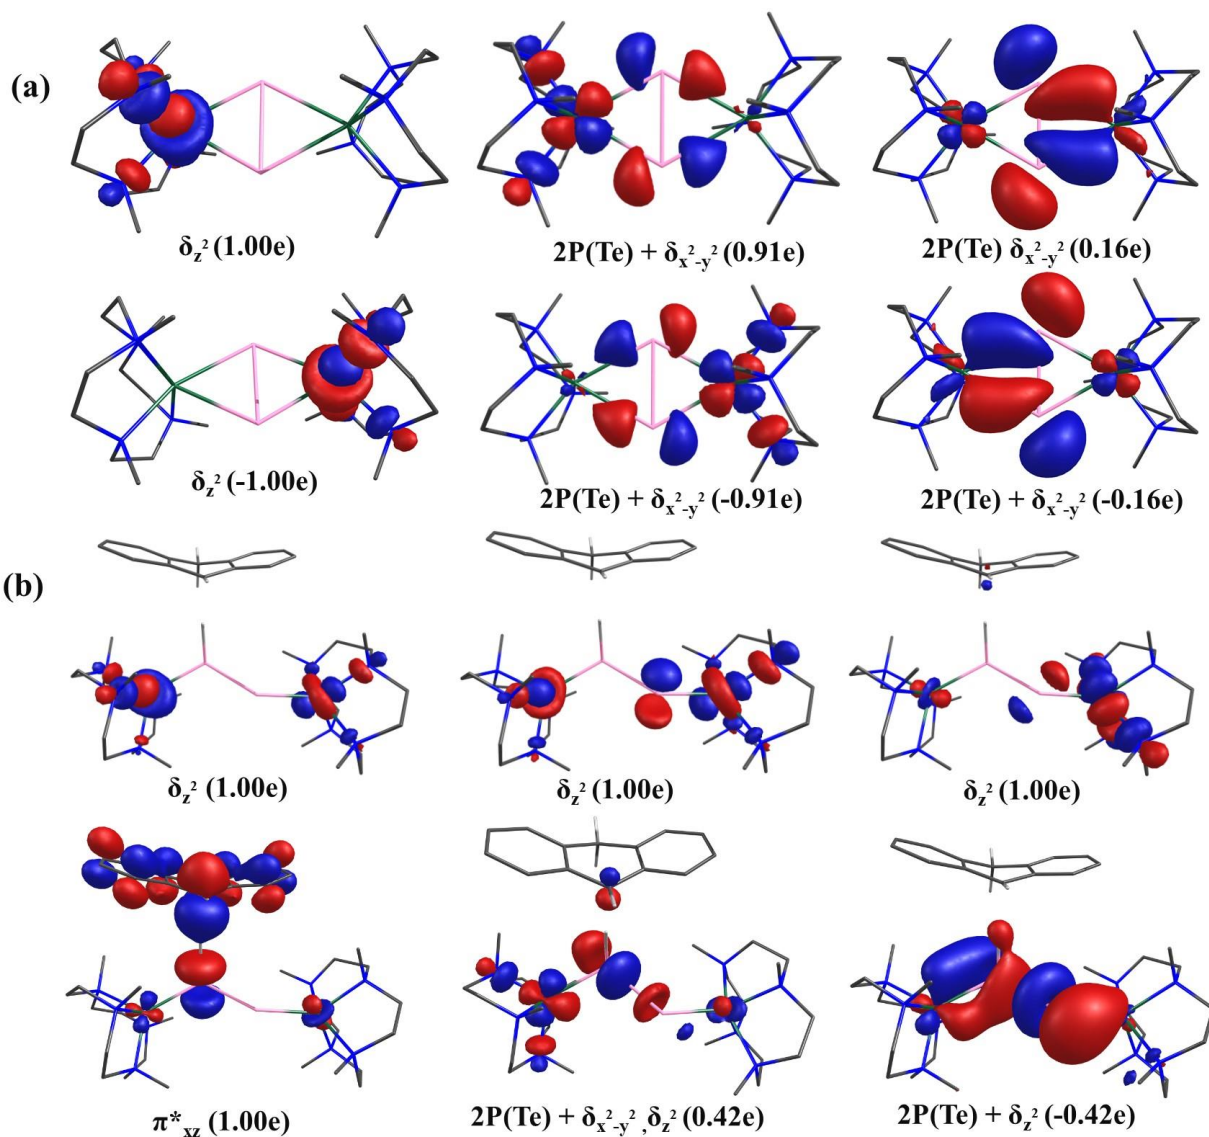

**Figure S51.** Spin natural orbitals and their occupations (noted in parenthesis) of Complex 4 (a)  $^1R_{(t,t)}$  (top panel) and (b)  $^5tsI_{(t,t)}$  (bottom panel).

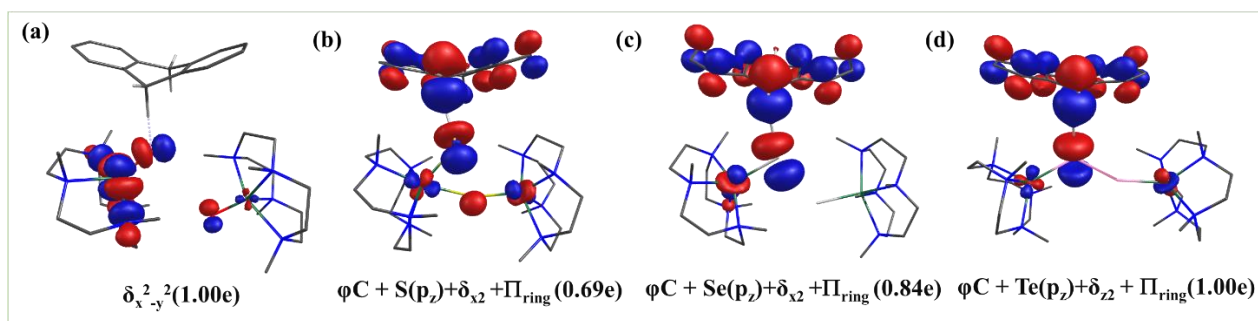

**Figure S52-** SNO plots for complexes 1-4. (a) for complex 1, (b) for complex 2, (c) for complex 3, (d) for complex 4.

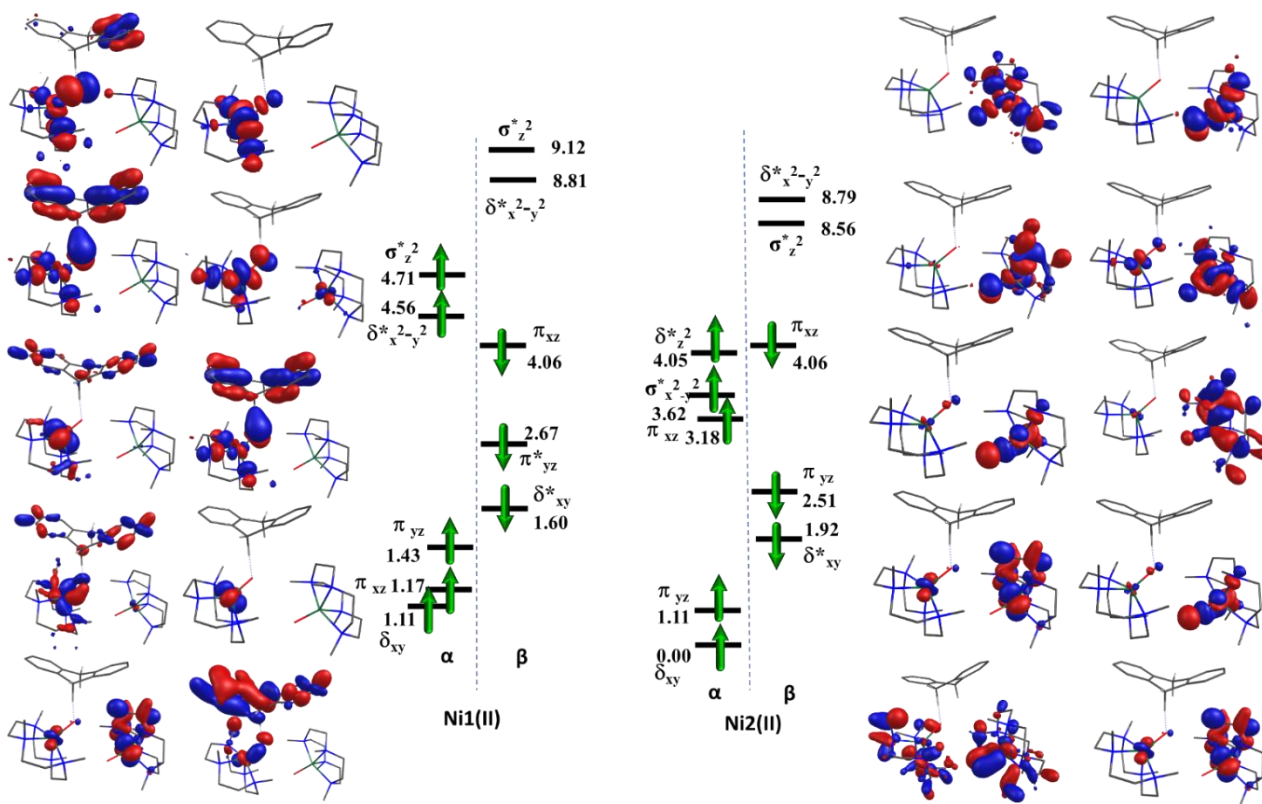

**Figure S53-** Computed eigenvalue plot incorporating energies computed for d-based orbitals for alpha and beta spin corresponding to the ground state  $^5\text{TS1}_{(t,t)}$  of the complex **1** (energies are given in eV)

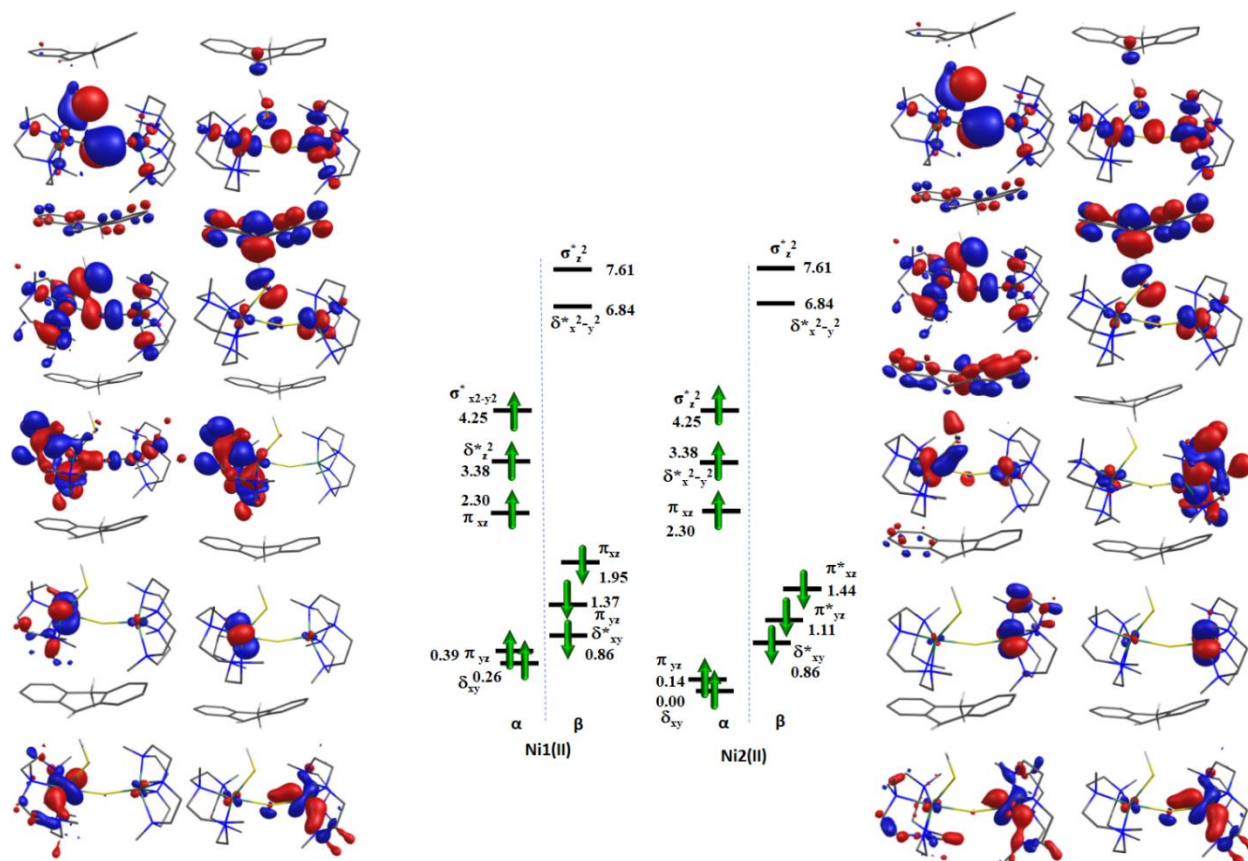

**Figure S54-** Computed eigenvalue plot incorporating energies computed for d-based orbitals for alpha and beta spin corresponding to the state  $^5\text{TS1}_{(t,t)}$  of the complex **2** (energies are given in eV)

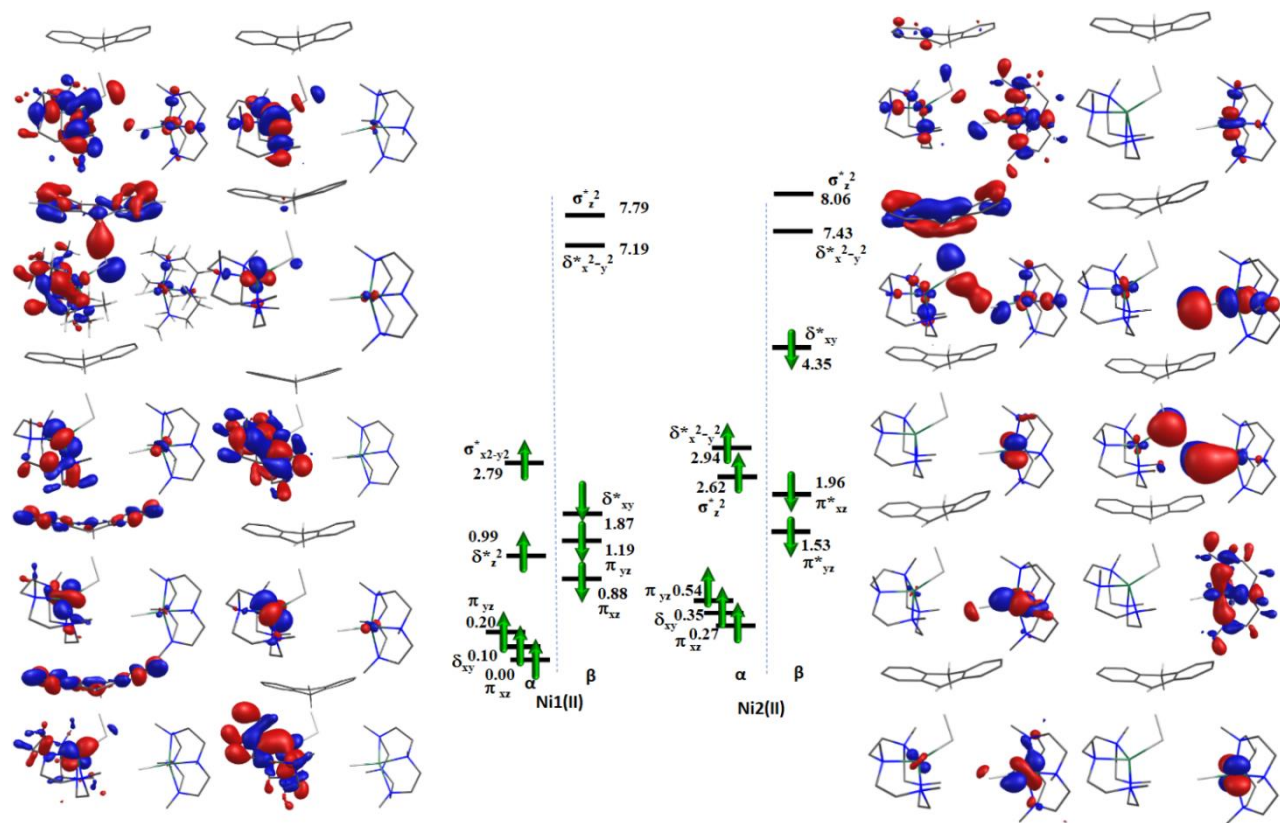

**Figure S55-** Computed eigenvalue plot incorporating energies computed for d-based orbitals for alpha and beta spin corresponding to the ground state  $^5\text{TS1}_{(t,t)}$  of the complex **3** (energies are given in eV)

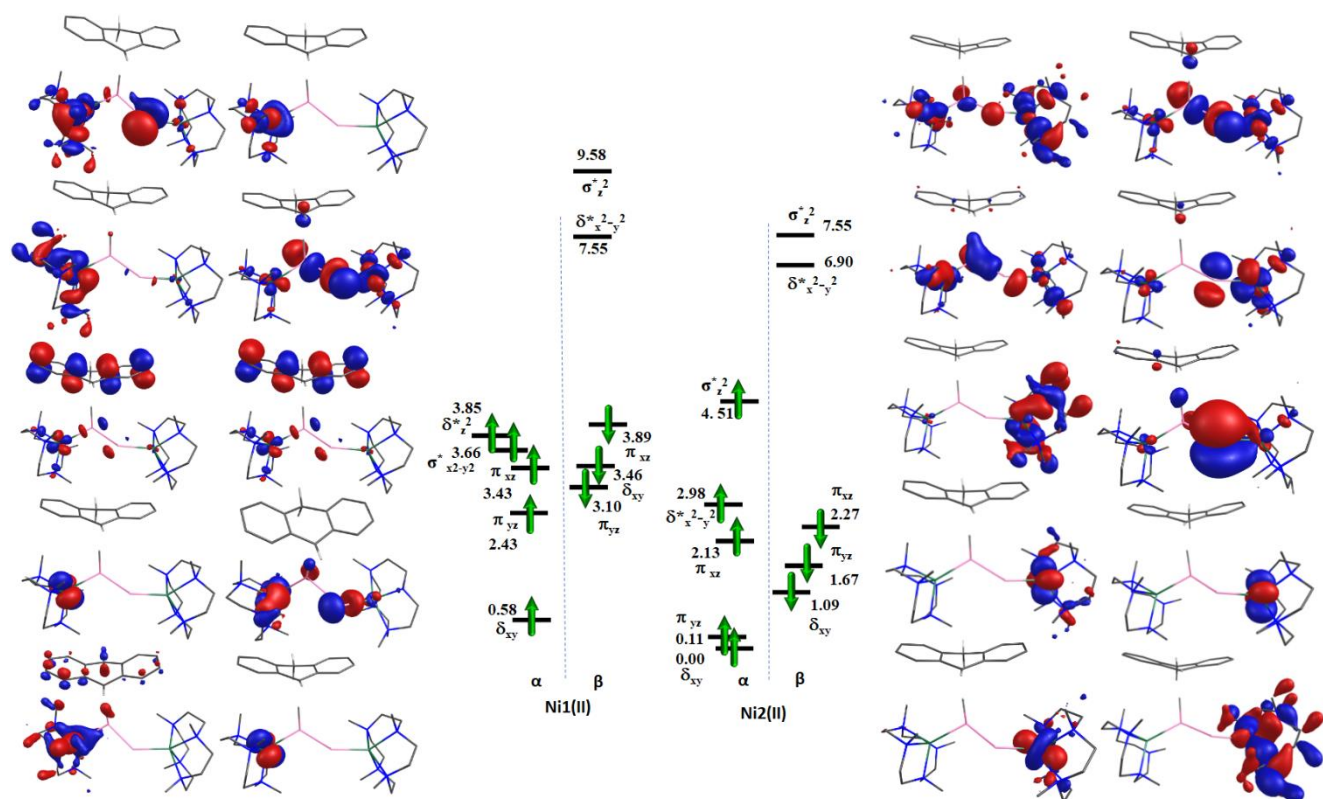

**Figure S56-** Computed eigenvalue plot incorporating energies computed for d-based orbitals for alpha and beta spin corresponding to the ground state  ${}^5\text{TS1}_{(t,t)}$  of the complex **4** (energies are given in eV)

**Table S10.** Cartesian non-adiabatic couplings parameters of the first hydrogen abstraction transition state TS1 of the complex **1–4**.

| First hydrogen abstraction (TS1) | Norm of the NACs | RMS NACs | MAX NAC |
|----------------------------------|------------------|----------|---------|
| ${}^5\text{TS1}_{(t,t)}$         | 2.66             | 0.14     | 1.33    |
| ${}^1\text{TS1}_{(t,t)}$         | 1.97             | 0.10     | 1.21    |
| ${}^5\text{TS1}_{(t,t)}$         | 0.56             | 0.03     | 0.34    |
| ${}^5\text{TS1}_{(t,t)}$         | 0.52             | 0.03     | 0.29    |

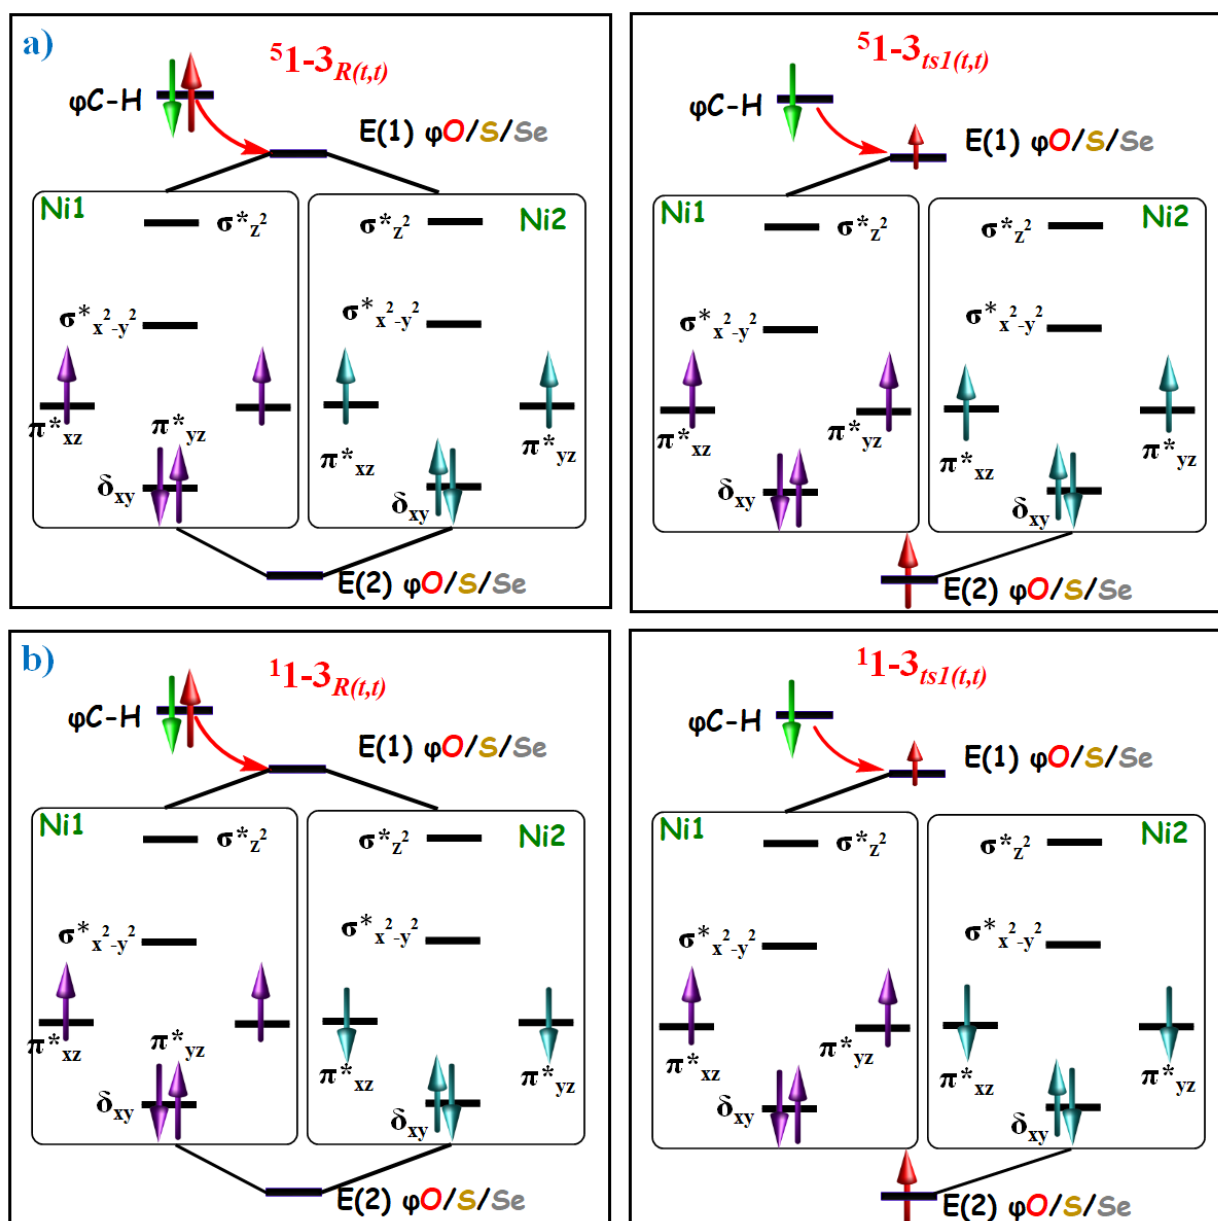

**Figure S57.** Electron shift diagrams for a) ferromagnetic reactant species ( ${}^5\mathbf{1-3}_{R(t,t)}$ ) and ground state ts1 ( ${}^5\mathbf{1-3}_{ts1(t,t)}$ ) b) for antiferromagnetic reactant species ( ${}^1\mathbf{1-3}_{R(t,t)}$ ) and first excited transition state ( ${}^1\mathbf{1-3}_{ts1(t,t)}$ ), showed  $\alpha$ -electron transfer from the substrate, triggers Ni–E bond cleavage, and the transferred electron is found to be located on the E(2) centre, resulting in the formation of Ni(II)-E $\cdot$  species.

**Table S11.**  $J$  values computed for single monomer core Ni(2)-E(2) core.

| Half core of HAT ts1 | $J$ value |
|----------------------|-----------|
| $1_{ts1}$            | 366.6     |
| $2_{ts1}$            | 147.0     |
| $3_{ts1}$            | 163.4     |
| $4_{ts1}$            | 129.5     |

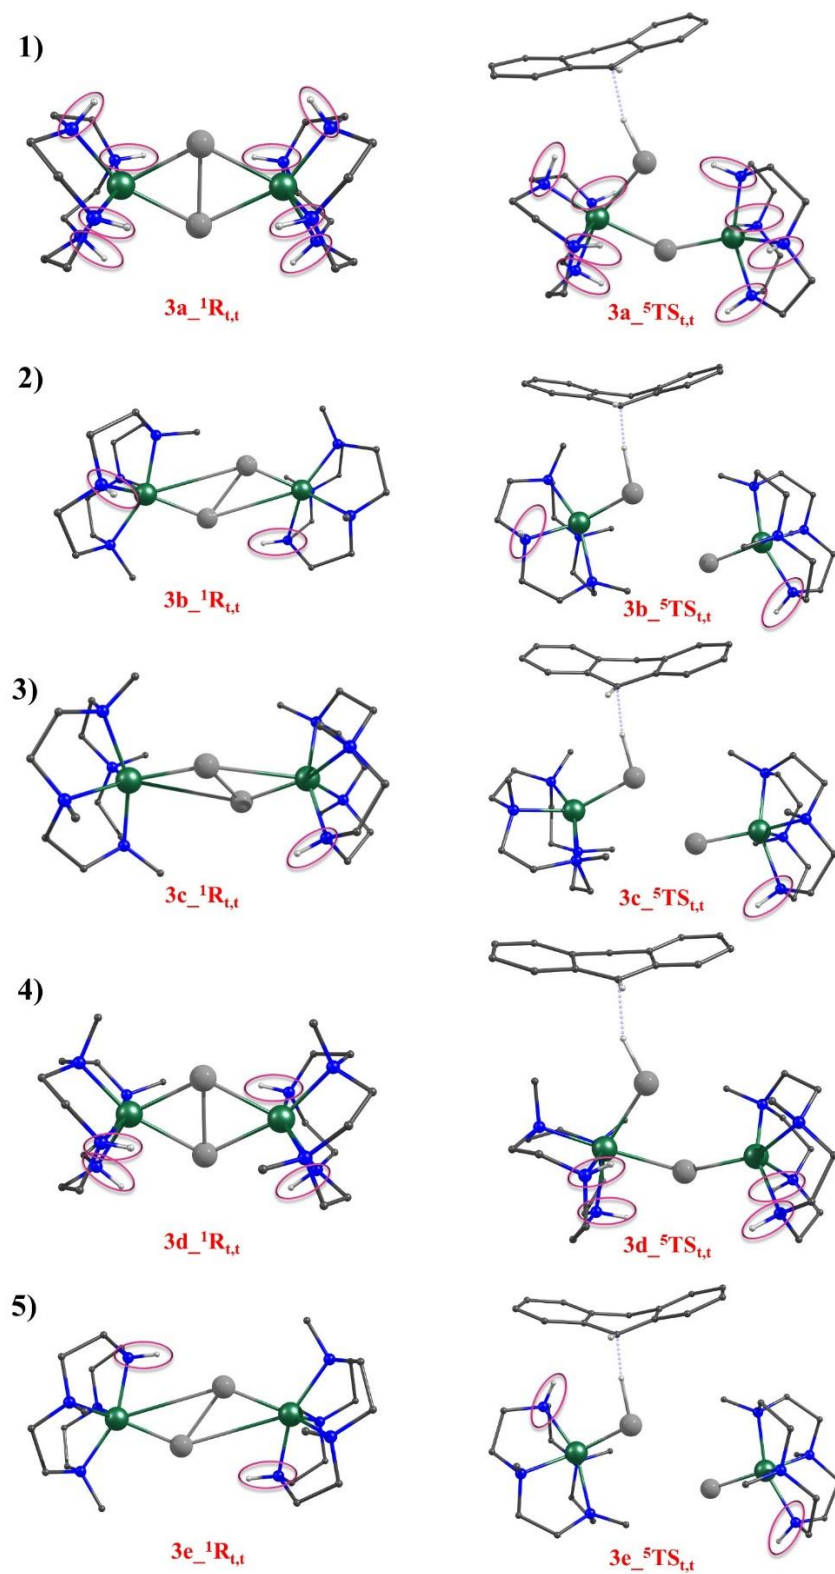

**Figure S58-** Optimized geometries of substituted reactant ( $^1R_{t,t}$ ) and first hydrogen abstraction transition state ( $^5TS_{t,t}$ ) species of complex **3** (**3a-3e**). Pink circle shows the substituted area.

**Table S12-** The correlation of J value with barrier height of first hydrogen abstraction transition state (TS1) by substituted geometries of complex **3**.

| <b>Substituted Geometries</b> | <b>J value (cm<sup>-1</sup>)</b> | <b>Barrier height (kJ/mol)</b> |
|-------------------------------|----------------------------------|--------------------------------|
| <b>1</b>                      | 300.2                            | 60.1                           |
| <b>2</b>                      | 302.5                            | 96.2                           |
| <b>3</b>                      | 333.3                            | 97.8                           |
| <b>4</b>                      | 334.6                            | 113.1                          |
| <b>5</b>                      | 338.5                            | 121.3                          |



**Table S13:** Computed spin densities and Mulliken charges of complex **1** for all possible spin states of reactants (**R**) along with bond lengths and bond angle obtained from optimized geometries in Gaussian 09.

| <b>Spin Density of Reactant (Complex 1)</b>            |                 |                 |                 |                 |
|--------------------------------------------------------|-----------------|-----------------|-----------------|-----------------|
| <b>Spin Density</b>                                    | ${}^5R_{(t,t)}$ | ${}^1R_{(t,t)}$ | ${}^3R_{(s,t)}$ | ${}^1R_{(s,s)}$ |
| Ni1                                                    | 1.64            | 1.58            | 1.57            | 0.00            |
| Ni2                                                    | 1.64            | -1.58           | 0.17            | 0.00            |
| O1                                                     | 0.14            | 0.00            | -0.01           | 0.00            |
| O2                                                     | 0.14            | 0.00            | -0.01           | 0.00            |
| N1a                                                    | 0.06            | 0.05            | 0.05            | 0.00            |
| N1b                                                    | 0.05            | 0.05            | 0.05            | 0.00            |
| N1c                                                    | 0.06            | 0.05            | 0.05            | 0.00            |
| N1d                                                    | 0.05            | 0.05            | 0.05            | 0.00            |
| N2a                                                    | 0.06            | -0.05           | -0.02           | 0.00            |
| N2b                                                    | 0.05            | -0.05           | 0.05            | 0.00            |
| N2c                                                    | 0.06            | -0.05           | -0.02           | 0.00            |
| N2d                                                    | 0.05            | -0.05           | 0.05            | 0.00            |
| <b>Mulliken Atomic Charges of Reactant (Complex 1)</b> |                 |                 |                 |                 |
| <b>Spin Density</b>                                    | ${}^5R_{(t,t)}$ | ${}^1R_{(t,t)}$ | ${}^3R_{(s,t)}$ | ${}^1R_{(s,s)}$ |
| NiA                                                    | 0.86            | 0.84            | 0.83            | 0.72            |
| NiB                                                    | 0.86            | 0.84            | 0.81            | 0.72            |
| O <sub>A</sub>                                         | -0.51           | -0.47           | -0.45           | -0.37           |
| O <sub>B</sub>                                         | -0.51           | -0.47           | -0.45           | -0.37           |
| N1a                                                    | -0.29           | -0.29           | -0.29           | -0.27           |
| N1b                                                    | -0.23           | -0.23           | -0.24           | -0.22           |
| N1c                                                    | -0.29           | -0.29           | -0.29           | -0.28           |
| N1d                                                    | -0.23           | -0.23           | -0.24           | -0.21           |
| N2a                                                    | -0.29           | -0.29           | -0.29           | -0.27           |
| N2b                                                    | -0.23           | -0.23           | -0.23           | -0.22           |
| N2c                                                    | -0.29           | -0.29           | -0.29           | -0.28           |
| N2d                                                    | -0.23           | -0.23           | -0.23           | -0.21           |

| <b>Bond parameter of the Reactant (Complex 1)</b> |                 |                 |                 |                 |
|---------------------------------------------------|-----------------|-----------------|-----------------|-----------------|
| <b>Bond Parameter</b>                             | ${}^5R_{(t,t)}$ | ${}^1R_{(t,t)}$ | ${}^3R_{(s,t)}$ | ${}^1R_{(s,s)}$ |
| Ni <sub>1</sub> -Ni <sub>2</sub>                  | 3.850           | 3.810           | 3.844           | 3.821           |
| Ni <sub>1</sub> -O <sub>1</sub>                   | 2.069           | 2.047           | 2.062           | 2.044           |
| Ni <sub>1</sub> -O <sub>2</sub>                   | 2.070           | 2.048           | 2.061           | 2.050           |
| Ni <sub>1</sub> -N <sub>1</sub>                   | 2.180           | 2.183           | 2.183           | 2.183           |
| Ni <sub>1</sub> -N <sub>2</sub>                   | 2.288           | 2.288           | 2.284           | 2.281           |
| Ni <sub>1</sub> -N <sub>3</sub>                   | 2.180           | 2.183           | 2.182           | 2.185           |
| Ni <sub>1</sub> -N <sub>4</sub>                   | 2.286           | 2.287           | 2.285           | 2.280           |
| O <sub>1</sub> -O <sub>2</sub>                    | 1.519           | 1.500           | 1.488           | 1.470           |
| Ni <sub>2</sub> -O <sub>1</sub>                   | 2.070           | 2.048           | 2.060           | 2.050           |
| Ni <sub>2</sub> -O <sub>2</sub>                   | 2.069           | 2.047           | 2.060           | 2.044           |
| Ni <sub>2</sub> -N <sub>1</sub>                   | 2.180           | 2.183           | 2.188           | 2.183           |
| Ni <sub>2</sub> -N <sub>2</sub>                   | 2.287           | 2.288           | 2.287           | 2.282           |
| Ni <sub>2</sub> -N <sub>3</sub>                   | 2.180           | 2.183           | 2.188           | 2.185           |
| Ni <sub>2</sub> -N <sub>4</sub>                   | 2.286           | 2.288           | 2.286           | 2.281           |
| <b>The bond angle of the Reactant (Complex 1)</b> |                 |                 |                 |                 |
| <b>Bond Angle</b>                                 | ${}^5R_{(t,t)}$ | ${}^1R_{(t,t)}$ | ${}^3R_{(s,t)}$ | ${}^1R_{(s,s)}$ |
| ∠Ni <sub>1</sub> -O <sub>1</sub> -O <sub>2</sub>  | 68.5            | 68.5            | 68.8            | 69.2            |
| ∠Ni <sub>1</sub> -O <sub>2</sub> -O <sub>1</sub>  | 68.4            | 68.5            | 68.8            | 68.7            |
| ∠Ni <sub>2</sub> -O <sub>1</sub> -O <sub>2</sub>  | 68.4            | 68.5            | 68.9            | 68.7            |
| ∠Ni <sub>2</sub> -O <sub>2</sub> -O <sub>1</sub>  | 68.5            | 68.5            | 68.8            | 69.2            |
| ∠Ni <sub>1</sub> -O <sub>1</sub> -Ni <sub>2</sub> | 136.9           | 137.0           | 137.7           | 137.9           |
| ∠Ni <sub>1</sub> -O <sub>2</sub> -Ni <sub>2</sub> | 136.9           | 137.0           | 137.7           | 137.9           |
| ∠N <sub>1</sub> -Ni <sub>1</sub> -N <sub>2</sub>  | 81.4            | 81.3            | 81.7            | 81.4            |
| ∠N <sub>2</sub> -Ni <sub>1</sub> -N <sub>3</sub>  | 81.3            | 81.5            | 80.7            | 81.9            |
| ∠N <sub>3</sub> -Ni <sub>1</sub> -N <sub>4</sub>  | 81.4            | 81.3            | 81.7            | 81.4            |
| ∠N <sub>4</sub> -Ni <sub>1</sub> -N <sub>1</sub>  | 81.4            | 81.5            | 80.7            | 81.9            |
| ∠N <sub>1</sub> -Ni <sub>2</sub> -N <sub>2</sub>  | 81.4            | 81.3            | 81.7            | 81.4            |
| ∠N <sub>2</sub> -Ni <sub>2</sub> -N <sub>3</sub>  | 81.3            | 81.5            | 80.7            | 81.9            |

|                                           |      |      |      |      |
|-------------------------------------------|------|------|------|------|
| $\angle\text{N}_3\text{-Ni}_2\text{-N}_4$ | 81.4 | 81.3 | 81.6 | 81.4 |
| $\angle\text{N}_4\text{-Ni}_2\text{-N}_1$ | 81.4 | 81.5 | 80.7 | 81.8 |

**Table S14-** Computed spin densities and Mulliken charges of complex **1** for all possible spin states of the first hydrogen abstraction transition state (*tsI*) along with bond lengths and bond angle obtained from optimized geometries in Gaussian 09.

| Mulliken spin density and charges values of the transition state (TS1) |                 |                 |                 |                                            |                 |                 |                 |
|------------------------------------------------------------------------|-----------------|-----------------|-----------------|--------------------------------------------|-----------------|-----------------|-----------------|
| Spin Density                                                           | $^5tsI_{(t,t)}$ | $^1tsI_{(t,t)}$ | $^3tsI_{(s,t)}$ | Mulliken Charges                           | $^5tsI_{(t,t)}$ | $^1tsI_{(t,t)}$ | $^3tsI_{(s,t)}$ |
| Ni1                                                                    | 1.59            | 1.60            | 1.65            | Ni1                                        | 0.80            | 0.81            | 0.80            |
| Ni2                                                                    | 1.61            | -1.59           | -0.04           | Ni2                                        | 0.68            | 0.70            | 0.69            |
| O1                                                                     | -0.58           | -0.58           | 0.80            | O1                                         | -0.61           | -0.61           | -0.59           |
| O2                                                                     | 1.08            | 0.85            | -1.02           | O2                                         | -0.49           | -0.50           | -0.49           |
| N1a                                                                    | 0.07            | 0.07            | 0.08            | N1a                                        | -0.28           | -0.28           | -0.28           |
| N1b                                                                    | 0.05            | 0.06            | 0.08            | N1b                                        | -0.22           | -0.22           | -0.21           |
| N1c                                                                    | 0.05            | 0.06            | 0.05            | N1c                                        | -0.29           | -0.28           | -0.29           |
| N1d                                                                    | 0.05            | 0.05            | 0.07            | N1d                                        | -0.24           | -0.24           | -0.23           |
| N2a                                                                    | 0.07            | -0.08           | 0.03            | N2a                                        | -0.28           | -0.28           | -0.28           |
| N2b                                                                    | 0.09            | -0.06           | 0.05            | N2b                                        | -0.21           | -0.21           | -0.21           |
| N2c                                                                    | 0.06            | -0.06           | -0.06           | N2c                                        | -0.29           | -0.29           | -0.28           |
| N2d                                                                    | 0.08            | -0.06           | 0.05            | N2d                                        | -0.22           | -0.23           | -0.22           |
| CDHA                                                                   | -0.19           | -0.19           | 0.19            | CDHA                                       | -0.20           | -0.20           | -0.21           |
| Bond parameters and Bond angles of the transition state (TS1)          |                 |                 |                 |                                            |                 |                 |                 |
| Bond Parameter                                                         | $^5tsI_{(t,t)}$ | $^1tsI_{(t,t)}$ | $^3tsI_{(s,t)}$ | Bond Angle                                 | $^5tsI_{(t,t)}$ | $^1tsI_{(t,t)}$ | $^3tsI_{(s,t)}$ |
| Ni1-Ni2                                                                | 5.789           | 5.789           | 5.727           | $\angle\text{Ni}_1\text{-O}_1\text{-O}_2$  | 91.3            | 91.0            | 83.1            |
| Ni1-O1                                                                 | 1.860           | 1.862           | 1.830           | $\angle\text{Ni}_1\text{-O}_2\text{-O}_1$  | 24.7            | 25.1            | 24.9            |
| Ni1-O2                                                                 | 4.452           | 4.383           | 4.320           | $\angle\text{Ni}_2\text{-O}_1\text{-O}_2$  | 20.9            | 21.5            | 20.6            |
| Ni1-N1                                                                 | 2.149           | 2.150           | 2.225           | $\angle\text{Ni}_2\text{-O}_2\text{-O}_1$  | 106.4           | 107.3           | 107.7           |
| Ni1-N2                                                                 | 2.233           | 2.231           | 2.171           | $\angle\text{Ni}_1\text{-O}_1\text{-Ni}_2$ | 112.0           | 112.2           | 103.3           |
| Ni1-N3                                                                 | 2.175           | 2.174           | 2.143           | $\angle\text{Ni}_1\text{-O}_2\text{-Ni}_2$ | 130.8           | 132.0           | 131.9           |
| Ni1-N4                                                                 | 2.278           | 2.280           | 2.223           | $\angle\text{N}_1\text{-Ni}_1\text{-N}_2$  | 83.0            | 82.9            | 83.5            |
| O1-O2                                                                  | 4.003           | 2.938           | 4.139           | $\angle\text{N}_2\text{-Ni}_1\text{-N}_3$  | 82.1            | 82.2            | 83.4            |
| Ni2-O1                                                                 | 4.828           | 4.824           | 5.022           | $\angle\text{N}_3\text{-Ni}_1\text{-N}_4$  | 80.8            | 80.8            | 82.0            |
| Ni2-O2                                                                 | 1.797           | 1.854           | 1.854           | $\angle\text{N}_4\text{-Ni}_1\text{-N}_1$  | 82.5            | 82.4            | 82.7            |
| Ni2-N1                                                                 | 2.145           | 2.130           | 2.137           | $\angle\text{N}_1\text{-Ni}_2\text{-N}_2$  | 83.1            | 83.5            | 83.3            |

|                                 |       |       |       |                                                  |       |       |       |
|---------------------------------|-------|-------|-------|--------------------------------------------------|-------|-------|-------|
| Ni <sub>2</sub> -N <sub>2</sub> | 2.217 | 2.211 | 2.209 | ∠N <sub>2</sub> -Ni <sub>2</sub> -N <sub>3</sub> | 82.9  | 83.3  | 83.5  |
| Ni <sub>2</sub> -N <sub>3</sub> | 2.158 | 2.146 | 2.142 | ∠N <sub>3</sub> -Ni <sub>2</sub> -N <sub>4</sub> | 82.6  | 82.6  | 82.8  |
| Ni <sub>2</sub> -N <sub>4</sub> | 2.222 | 2.223 | 2.221 | ∠N <sub>4</sub> -Ni <sub>2</sub> -N <sub>1</sub> | 83.3  | 83.6  | 83.5  |
| C-H <sub>abs</sub> (DHA)        | 1.203 | 1.205 | 1.221 | ∠O <sub>1</sub> -H-C <sub>DHA</sub>              | 165.8 | 165.7 | 167.1 |
| O-H <sub>abs</sub> (DHA)        | 1.459 | 1.456 | 1.410 | ∠H-O <sub>1</sub> -Ni                            | 124.7 | 124.5 | 132.0 |

**Table S15-** Computed spin densities and Mulliken charges of complex **1** for all possible spin states of intermediates (**Int1**), along with bond lengths and angles obtained from optimized geometries in Gaussian 09.

| Mulliken spin density and charges values of intermediate (Int1) |                                    |                                    |                                    |                  |                                    |                                    |                                    |
|-----------------------------------------------------------------|------------------------------------|------------------------------------|------------------------------------|------------------|------------------------------------|------------------------------------|------------------------------------|
| Spin Density                                                    | <sup>5</sup> Int1 <sub>(t,t)</sub> | <sup>1</sup> Int1 <sub>(t,t)</sub> | <sup>3</sup> Int1 <sub>(s,t)</sub> | Mulliken Charges | <sup>5</sup> Int1 <sub>(t,t)</sub> | <sup>1</sup> Int1 <sub>(t,t)</sub> | <sup>3</sup> Int1 <sub>(s,t)</sub> |
| Ni1                                                             | 1.65                               | 1.62                               | 1.65                               | Ni1              | 0.80                               | 0.67                               | 0.79                               |
| Ni2                                                             | 1.61                               | -1.64                              | -0.09                              | Ni2              | 0.68                               | 0.77                               | 0.62                               |
| O1                                                              | 0.11                               | -0.11                              | 0.12                               | O1               | -0.74                              | -0.74                              | -0.74                              |
| O2                                                              | 1.09                               | 1.06                               | -0.82                              | O2               | -0.49                              | -0.51                              | -0.49                              |
| N1a                                                             | 0.07                               | 0.05                               | 0.07                               | N1a              | -0.28                              | -0.29                              | -0.28                              |
| N1b                                                             | 0.06                               | 0.09                               | 0.06                               | N1b              | -0.23                              | -0.22                              | -0.23                              |
| N1c                                                             | 0.05                               | 0.09                               | 0.05                               | N1c              | -0.29                              | -0.26                              | -0.29                              |
| N1d                                                             | 0.05                               | 0.08                               | 0.05                               | N1d              | -0.22                              | -0.21                              | -0.22                              |
| N2a                                                             | 0.07                               | -0.05                              | 0.00                               | N2a              | -0.28                              | -0.30                              | -0.25                              |
| N2b                                                             | 0.09                               | -0.06                              | -0.08                              | N2b              | -0.21                              | -0.22                              | -0.20                              |
| N2c                                                             | 0.06                               | -0.07                              | 0.02                               | N2c              | -0.28                              | -0.28                              | -0.28                              |
| N2d                                                             | 0.08                               | -0.05                              | -0.06                              | N2d              | -0.22                              | -0.21                              | -0.20                              |
| CDHA                                                            | -0.70                              | -0.71                              | 0.70                               | CDHA             | -0.27                              | -0.29                              | -0.27                              |
| Bond parameters and Bond angles of Intermediate (Int1)          |                                    |                                    |                                    |                  |                                    |                                    |                                    |
| Bond Parameter                                                  | <sup>5</sup> Int1 <sub>(t,t)</sub> | <sup>1</sup> Int1 <sub>(t,t)</sub> | <sup>3</sup> Int1 <sub>(s,t)</sub> | Bond Angle       | <sup>5</sup> Int1 <sub>(t,t)</sub> | <sup>1</sup> Int1 <sub>(t,t)</sub> | <sup>3</sup> Int1 <sub>(s,t)</sub> |
| Ni1-Ni2                                                         | 5.640                              | 5.603                              | 5.823                              | ∠Ni1-O1-O2       | 93.8                               | 123.9                              | 97.2                               |
| Ni1-O1                                                          | 1.880                              | 1.806                              | 1.876                              | ∠Ni1-O2-O1       | 25.0                               | 21.5                               | 24.9                               |
| Ni1-O2                                                          | 4.439                              | 3.910                              | 4.415                              | ∠Ni2-O1-O2       | 23.0                               | 25.8                               | 20.9                               |
| Ni1-N1                                                          | 2.142                              | 2.171                              | 2.144                              | ∠Ni2-O2-O1       | 98.9                               | 109.8                              | 111.3                              |

|                          |       |       |       |                                |       |       |       |
|--------------------------|-------|-------|-------|--------------------------------|-------|-------|-------|
| Ni1-N2                   | 2.226 | 2.211 | 2.224 | $\angle$ Ni1-O1-Ni2            | 116.7 | 131.1 | 116.7 |
| Ni1-N3                   | 2.156 | 2.136 | 2.160 | $\angle$ Ni1-O2-Ni2            | 123.8 | 149.4 | 134.6 |
| Ni1-N4                   | 2.250 | 2.204 | 2.250 | $\angle$ N1-Ni1-N2             | 83.0  | 81.9  | 83.0  |
| O1-O2                    | 3.900 | 2.910 | 3.769 | $\angle$ N2-Ni1-N3             | 82.6  | 84.4  | 82.7  |
| Ni2-O1                   | 4.538 | 4.249 | 4.732 | $\angle$ N3-Ni1-N4             | 82.6  | 83.5  | 82.3  |
| Ni2-O2                   | 1.797 | 1.872 | 1.802 | $\angle$ N4-Ni1-N1             | 83.2  | 82.5  | 82.8  |
| Ni2-N1                   | 2.154 | 2.165 | 2.242 | $\angle$ N1-Ni2-N2             | 83.5  | 82.0  | 83.2  |
| Ni2-N2                   | 2.217 | 2.240 | 2.169 | $\angle$ N2-Ni2-N3             | 82.9  | 83.4  | 83.8  |
| Ni2-N3                   | 2.165 | 2.121 | 2.112 | $\angle$ N3-Ni2-N4             | 82.4  | 83.6  | 83.9  |
| Ni2-N4                   | 2.221 | 2.242 | 2.152 | $\angle$ N4-Ni2-N1             | 83.7  | 81.9  | 84.1  |
| C-H <sub>abs</sub> (DHA) | 3.401 | 5.939 | 4.179 | $\angle$ O1-H-C <sub>DHA</sub> | 141.2 | -     | 136.7 |
| O-H <sub>abs</sub> (DHA) | 0.970 | 0.977 | 0.969 | $\angle$ H-O1-Ni               | 114.3 | -     | 114.5 |

**Table S16-** Computed spin densities and Mulliken charges of complex **2** for all possible spin states of reactants (**R**) along with bond lengths and bond angle obtained from optimized geometries in Gaussian 09 (Ni1, Ni48 or Ni2, S1 or S47, S2 or S48).

| Spin Density of Reactant (Complex 2) |                 |                 |                 |                 |
|--------------------------------------|-----------------|-----------------|-----------------|-----------------|
| Spin Density                         | ${}^5R_{(t,t)}$ | ${}^1R_{(t,t)}$ | ${}^3R_{(s,t)}$ | ${}^1R_{(s,s)}$ |
| Ni1                                  | 1.61            | 1.53            | 1.52            | 0.00            |
| Ni2                                  | 1.61            | -1.53           | 0.18            | 0.00            |
| S1                                   | 0.12            | 0.00            | -0.02           | 0.00            |
| S2                                   | 0.12            | 0.00            | -0.02           | 0.00            |
| N1a                                  | 0.07            | 0.07            | 0.07            | 0.00            |

|                                                        |                 |                 |                 |                 |
|--------------------------------------------------------|-----------------|-----------------|-----------------|-----------------|
| N1b                                                    | 0.06            | 0.05            | 0.05            | 0.00            |
| N1c                                                    | 0.07            | 0.07            | 0.07            | 0.00            |
| N1d                                                    | 0.06            | 0.05            | 0.05            | 0.00            |
| N2a                                                    | 0.07            | -0.07           | -0.02           | 0.00            |
| N2b                                                    | 0.06            | -0.05           | 0.06            | 0.00            |
| N2c                                                    | 0.07            | -0.07           | -0.02           | 0.00            |
| N2d                                                    | 0.06            | -0.05           | 0.06            | 0.00            |
| <b>Mulliken Atomic Charges of Reactant (Complex 2)</b> |                 |                 |                 |                 |
| <b>Spin Density</b>                                    | ${}^5R_{(t,t)}$ | ${}^1R_{(t,t)}$ | ${}^3R_{(s,t)}$ | ${}^1R_{(s,s)}$ |
| Ni1                                                    | 0.89            | 0.86            | 0.86            | 0.41            |
| Ni2                                                    | 0.89            | 0.86            | 0.87            | 0.44            |
| S1                                                     | -0.56           | -0.52           | -0.50           | -0.37           |
| S2                                                     | -0.56           | -0.52           | -0.50           | -0.36           |
| N1a                                                    | -0.30           | -0.30           | -0.29           | -0.25           |
| N1b                                                    | -0.23           | -0.23           | -0.23           | -0.18           |
| N1c                                                    | -0.30           | -0.30           | -0.29           | -0.22           |
| N1d                                                    | -0.23           | -0.23           | -0.23           | -0.18           |
| N2a                                                    | -0.30           | -0.30           | -0.29           | -0.25           |
| N2b                                                    | -0.23           | -0.23           | -0.23           | -0.20           |
| N2c                                                    | -0.30           | -0.30           | -0.29           | -0.22           |
| N2d                                                    | -0.23           | -0.23           | -0.23           | -0.21           |
| <b>Bond parameter of reactant (Complex 2)</b>          |                 |                 |                 |                 |
| <b>Bond Parameter</b>                                  | ${}^5R_{(t,t)}$ | ${}^1R_{(t,t)}$ | ${}^3R_{(s,t)}$ | ${}^1R_{(s,s)}$ |
| Ni1-Ni2                                                | 4.713           | 4.635           | 4.623           | 5.526           |
| Ni1-S1                                                 | 2.634           | 2.595           | 2.580           | 2.325           |
| Ni1-S2                                                 | 2.632           | 2.595           | 2.581           | 3.583           |
| Ni1-N1                                                 | 2.193           | 2.198           | 2.200           | 2.022           |
| Ni1-N2                                                 | 2.235           | 2.244           | 2.246           | 2.045           |
| Ni1-N3                                                 | 2.193           | 2.198           | 2.200           | 2.564           |
| Ni1-N4                                                 | 2.235           | 2.244           | 2.246           | 2.045           |

|                                                    |                                      |                                      |                                      |                                      |
|----------------------------------------------------|--------------------------------------|--------------------------------------|--------------------------------------|--------------------------------------|
| S <sub>1</sub> -S <sub>2</sub>                     | 2.348                                | 2.335                                | 2.326                                | 2.329                                |
| Ni <sub>2</sub> -S <sub>1</sub>                    | 2.632                                | 2.595                                | 2.595                                | 3.512                                |
| Ni <sub>2</sub> -S <sub>2</sub>                    | 2.634                                | 2.595                                | 2.594                                | 2.324                                |
| Ni <sub>2</sub> -N <sub>1</sub>                    | 2.193                                | 2.198                                | 2.200                                | 2.022                                |
| Ni <sub>2</sub> -N <sub>2</sub>                    | 2.235                                | 2.244                                | 2.246                                | 2.051                                |
| Ni <sub>2</sub> -N <sub>3</sub>                    | 2.193                                | 2.198                                | 2.200                                | 2.549                                |
| Ni <sub>2</sub> -N <sub>4</sub>                    | 2.235                                | 2.244                                | 2.246                                | 2.051                                |
| <b>The bond angle of the Reactant (Complex 2)</b>  |                                      |                                      |                                      |                                      |
| <b>Bond Angle</b>                                  | <b><sup>5</sup>R<sub>(t,t)</sub></b> | <b><sup>1</sup>R<sub>(t,t)</sub></b> | <b><sup>3</sup>R<sub>(s,t)</sub></b> | <b><sup>1</sup>R<sub>(s,s)</sub></b> |
| ∠Ni <sub>1</sub> -S <sub>1</sub> -S <sub>2</sub>   | 63.6                                 | 63.3                                 | 63.2                                 | 100.6                                |
| ∠Ni <sub>1</sub> -S <sub>2</sub> -S <sub>1</sub>   | 63.5                                 | 63.3                                 | 63.2                                 | 39.6                                 |
| ∠Ni <sub>2</sub> -S <sub>1</sub> -S <sub>2</sub>   | 63.5                                 | 63.3                                 | 63.4                                 | 100.6                                |
| ∠Ni <sub>2</sub> -S <sub>2</sub> -S <sub>1</sub>   | 63.6                                 | 63.3                                 | 63.4                                 | 39.6                                 |
| ∠Se <sub>1</sub> -Ni <sub>1</sub> -Se <sub>2</sub> | 53.0                                 | 53.5                                 | 53.6                                 | 37.8                                 |
| ∠Se <sub>1</sub> -Ni <sub>2</sub> -Se <sub>2</sub> | 52.9                                 | 53.3                                 | 53.2                                 | 37.8                                 |
| ∠Ni <sub>1</sub> -S <sub>1</sub> -Ni <sub>2</sub>  | 127.0                                | 126.5                                | 126.6                                | 141.6                                |
| ∠Ni <sub>1</sub> -S <sub>2</sub> -Ni <sub>2</sub>  | 127.0                                | 126.5                                | 126.6                                | 137.6                                |
| ∠N <sub>1</sub> -Ni <sub>1</sub> -N <sub>2</sub>   | 82.3                                 | 82.1                                 | 82.1                                 | 86.1                                 |
| ∠N <sub>2</sub> -Ni <sub>1</sub> -N <sub>3</sub>   | 81.7                                 | 81.6                                 | 81.7                                 | 83.9                                 |
| ∠N <sub>3</sub> -Ni <sub>1</sub> -N <sub>4</sub>   | 82.3                                 | 82.1                                 | 82.1                                 | 83.9                                 |
| ∠N <sub>4</sub> -Ni <sub>1</sub> -N <sub>1</sub>   | 81.7                                 | 81.6                                 | 81.7                                 | 86.1                                 |
| ∠N <sub>1</sub> -Ni <sub>2</sub> -N <sub>2</sub>   | 82.3                                 | 82.1                                 | 82.1                                 | 86.0                                 |
| ∠N <sub>2</sub> -Ni <sub>2</sub> -N <sub>3</sub>   | 81.7                                 | 81.6                                 | 81.6                                 | 83.8                                 |
| ∠N <sub>3</sub> -Ni <sub>2</sub> -N <sub>4</sub>   | 82.3                                 | 82.1                                 | 82.1                                 | 83.8                                 |
| ∠N <sub>4</sub> -Ni <sub>2</sub> -N <sub>1</sub>   | 81.7                                 | 81.6                                 | 81.6                                 | 86.0                                 |

**Table S17-** Computed spin densities and Mulliken charges of complex **2** for all possible spin states of the first hydrogen abstraction transition state along with bond lengths and bond angle obtained from optimized geometries in Gaussian 09.

| Mulliken spin density and charges values of the transition state (TS1) |                   |                   |                   |                   |                     |                   |                   |                   |                   |
|------------------------------------------------------------------------|-------------------|-------------------|-------------------|-------------------|---------------------|-------------------|-------------------|-------------------|-------------------|
| Spin Density                                                           | ${}^5tsI_{(t,t)}$ | ${}^1tsI_{(t,t)}$ | ${}^3tsI_{(s,t)}$ | ${}^1tsI_{(s,s)}$ | Mulliken Charges    | ${}^5tsI_{(t,t)}$ | ${}^1tsI_{(t,t)}$ | ${}^3tsI_{(s,t)}$ | ${}^1tsI_{(s,s)}$ |
| Ni1                                                                    | 1.60              | 1.57              | 1.60              | 0.00              | Ni1                 | 0.82              | 0.70              | 0.77              | 0.58              |
| Ni2                                                                    | 1.61              | -1.60             | 0.11              | 0.00              | Ni2                 | 0.70              | 0.68              | 0.74              | 0.40              |
| S1                                                                     | 0.15              | 0.19              | 0.04              | 0.00              | S1                  | -0.47             | -0.41             | -0.27             | -0.43             |
| S2                                                                     | 0.78              | 0.53              | -0.67             | 0.00              | S2                  | -0.56             | -0.41             | -0.53             | -0.56             |
| N1a                                                                    | 0.06              | 0.07              | 0.09              | 0.00              | N1a                 | -0.27             | -0.29             | -0.29             | -0.20             |
| N1b                                                                    | 0.05              | 0.07              | 0.06              | 0.00              | N1b                 | -0.23             | -0.23             | -0.23             | -0.19             |
| N1c                                                                    | 0.05              | 0.07              | 0.05              | 0.00              | N1c                 | -0.26             | -0.29             | -0.30             | -0.26             |
| N1d                                                                    | 0.05              | 0.06              | 0.07              | 0.00              | N1d                 | -0.23             | -0.23             | -0.20             | -0.23             |
| N2a                                                                    | 0.08              | -0.08             | -0.03             | 0.00              | N2a                 | -0.27             | -0.28             | -0.26             | -0.19             |
| N2b                                                                    | 0.07              | -0.07             | 0.06              | 0.00              | N2b                 | -0.23             | -0.21             | -0.23             | -0.20             |
| N2c                                                                    | 0.06              | -0.06             | 0.00              | 0.00              | N2c                 | -0.29             | -0.29             | -0.28             | -0.25             |
| N2d                                                                    | 0.05              | -0.06             | 0.06              | 0.00              | N2d                 | -0.23             | -0.23             | -0.20             | -0.20             |
| CDHA                                                                   | -0.46             | -0.46             | 0.43              | 0.00              | CDHA                | -0.36             | -0.30             | -0.29             | -0.40             |
| Bond parameters and Bond angles of the transition state (TS1)          |                   |                   |                   |                   |                     |                   |                   |                   |                   |
| Bond Parameter                                                         | ${}^5tsI_{(t,t)}$ | ${}^1tsI_{(t,t)}$ | ${}^3tsI_{(s,t)}$ | ${}^1tsI_{(s,s)}$ | Bond Angle          | ${}^5tsI_{(t,t)}$ | ${}^1tsI_{(t,t)}$ | ${}^3tsI_{(s,t)}$ | ${}^1tsI_{(s,s)}$ |
| Ni1-Ni2                                                                | 4.746             | 4.865             | 4.817             | 5.547             | $\angle$ Ni1-S1-S2  | 54.4              | 96.8              | 42.9              | 78.4              |
| Ni1-S1                                                                 | 2.522             | 2.507             | 2.495             | 2.309             | $\angle$ Ni1-S2-S1  | 54.0              | 25.6              | 83.8              | 42.3              |
| Ni1-S2                                                                 | 2.534             | 2.595             | 2.568             | 3.363             | $\angle$ Ni2-S1-S2  | 32.1              | 26.9              | 57.5              | 23.7              |
| Ni1-N1                                                                 | 2.289             | 2.248             | 2.255             | 2.605             | $\angle$ Ni2-S2-S1  | 104.7             | 90.8              | 53.5              | 124.2             |
| Ni1-N2                                                                 | 2.248             | 2.242             | 2.247             | 2.065             | $\angle$ Ni1-S1-Ni2 | 86.4              | 123.7             | 100.3             | 101.5             |
| Ni1-N3                                                                 | 2.231             | 2.272             | 2.285             | 2.045             | $\angle$ Ni1-S2-Ni2 | 158.1             | 116.4             | 137.3             | 163.5             |
| Ni1-N4                                                                 | 2.244             | 2.225             | 2.230             | 2.061             | $\angle$ N1-Ni1-N2  | 79.7              | 83.4              | 83.3              | 81.8              |
| S1-S2                                                                  | 2.960             | 2.817             | 2.826             | 2.956             | $\angle$ N2-Ni1-N3  | 80.7              | 82.9              | 81.7              | 86.2              |
| Ni2-S1                                                                 | 4.183             | 4.151             | 4.106             | 4.604             | $\angle$ N3-Ni1-N4  | 79.6              | 83.1              | 80.8              | 85.1              |
| Ni2-S2                                                                 | 2.229             | 2.330             | 2.322             | 2.240             | $\angle$ N4-Ni1-N1  | 80.6              | 82.7              | 83.1              | 82.1              |
| Ni2-N1                                                                 | 2.147             | 2.131             | 2.170             | 2.580             | $\angle$ N1-Ni2-N2  | 83.9              | 83.8              | 80.5              | 83.2              |
| Ni2-N2                                                                 | 2.229             | 2.227             | 2.199             | 2.059             | $\angle$ N2-Ni2-N3  | 105.3             | 83.0              | 81.1              | 85.6              |
| Ni2-N3                                                                 | 2.180             | 2.168             | 2.152             | 2.056             | $\angle$ N3-Ni2-N4  | 81.0              | 82.7              | 81.5              | 85.5              |
| Ni2-N4                                                                 | 2.310             | 2.278             | 2.278             | 2.067             | $\angle$ N4-Ni2-N1  | 81.2              | 83.1              | 78.9              | 83.2              |
| C-Habs(DHA)                                                            | 1.882             | 1.744             | 1.697             | 1.791             | $\angle$ S1-H-CDHA  | 148.2             | 126.6             | 151.9             | 158.9             |
| S-Habs(DHA)                                                            | 1.456             | 1.485             | 1.500             | 1.462             | $\angle$ H-S1-Ni    | 121.3             | 103.5             | 98.6              | 112.9             |



**Table S18-** Computed spin densities and Mulliken charges of complex **2** for all possible spin states of intermediates (**Int1**), along with bond lengths and angles obtained from optimized geometries in Gaussian 09.

| Mulliken spin density and charges values of intermediate (Int1) |                                    |                                    |                                    |                  |                                    |                                    |                                    |
|-----------------------------------------------------------------|------------------------------------|------------------------------------|------------------------------------|------------------|------------------------------------|------------------------------------|------------------------------------|
| Spin Density                                                    | <sup>5</sup> Int1 <sub>(t,t)</sub> | <sup>1</sup> Int1 <sub>(t,t)</sub> | <sup>3</sup> Int1 <sub>(s,t)</sub> | Mulliken Charges | <sup>5</sup> Int1 <sub>(t,t)</sub> | <sup>1</sup> Int1 <sub>(t,t)</sub> | <sup>3</sup> Int1 <sub>(s,t)</sub> |
| Ni1                                                             | 1.61                               | 1.62                               | 1.61                               | Ni1              | 0.80                               | 0.70                               | 0.77                               |
| Ni2                                                             | 1.61                               | -1.64                              | 0.13                               | Ni2              | 0.83                               | 0.68                               | 0.74                               |
| S1                                                              | -0.15                              | 0.10                               | 0.27                               | S1               | -0.32                              | -0.41                              | -0.27                              |
| S2                                                              | -0.52                              | 0.90                               | 0.63                               | S2               | -0.53                              | -0.41                              | -0.53                              |
| N1a                                                             | 0.05                               | 0.07                               | 0.05                               | N1a              | -0.28                              | -0.29                              | -0.29                              |
| N1b                                                             | 0.05                               | 0.07                               | 0.06                               | N1b              | -0.23                              | -0.23                              | -0.23                              |
| N1c                                                             | 0.06                               | 0.07                               | 0.06                               | N1c              | -0.28                              | -0.29                              | -0.30                              |
| N1d                                                             | 0.05                               | 0.06                               | 0.09                               | N1d              | -0.20                              | -0.21                              | -0.20                              |
| N2a                                                             | 0.05                               | -0.07                              | -0.03                              | N2a              | -0.29                              | -0.28                              | -0.26                              |
| N2b                                                             | 0.05                               | -0.07                              | 0.06                               | N2b              | -0.23                              | -0.23                              | -0.23                              |
| N2c                                                             | 0.06                               | -0.07                              | 0.00                               | N2c              | -0.28                              | -0.29                              | -0.27                              |
| N2d                                                             | 0.05                               | -0.06                              | 0.06                               | N2d              | -0.21                              | -0.21                              | -0.20                              |
| CDHA                                                            | 0.70                               | -0.69                              | -0.70                              | CDHA             | -0.28                              | -0.30                              | -0.29                              |
| Bond parameters and Bond angles of Intermediate (Int1)          |                                    |                                    |                                    |                  |                                    |                                    |                                    |
| Bond Parameter                                                  | <sup>5</sup> Int1 <sub>(t,t)</sub> | <sup>1</sup> Int1 <sub>(t,t)</sub> | <sup>3</sup> Int1 <sub>(s,t)</sub> | Bond Angle       | <sup>5</sup> Int1 <sub>(t,t)</sub> | <sup>1</sup> Int1 <sub>(t,t)</sub> | <sup>3</sup> Int1 <sub>(s,t)</sub> |
| Ni1-Ni2                                                         | 4.332                              | 6.711                              | 4.662                              | ∠Ni1-S1-S2       | 54.7                               | 96.8                               | 57.5                               |
| Ni1-S1                                                          | 2.657                              | 2.329                              | 3.543                              | ∠Ni1-S2-S1       | 59.6                               | 25.6                               | 53.5                               |
| Ni1-S2                                                          | 2.514                              | 5.346                              | 2.424                              | ∠Ni2-S1-S2       | 54.5                               | 26.9                               | 42.9                               |
| Ni1-N1                                                          | 2.238                              | 2.131                              | 2.153                              | ∠Ni2-S2-S1       | 59.7                               | 90.8                               | 83.8                               |
| Ni1-N2                                                          | 2.278                              | 2.239                              | 2.243                              | ∠Ni1-S1-Ni2      | 109.1                              | 123.7                              | 100.3                              |
| Ni1-N3                                                          | 2.254                              | 2.140                              | 2.186                              | ∠Ni1-S2-Ni2      | 119.3                              | 116.4                              | 137.2                              |
| Ni1-N4                                                          | 2.301                              | 2.252                              | 2.272                              | ∠N1-Ni1-N2       | 80.4                               | 83.4                               | 83.3                               |
| S1-S2                                                           | 2.810                              | 4.546                              | 2.859                              | ∠N2-Ni1-N3       | 80.4                               | 82.9                               | 81.7                               |
| Ni2-S1                                                          | 2.659                              | 5.134                              | 2.463                              | ∠N3-Ni1-N4       | 148.8                              | 82.5                               | 80.7                               |
| Ni2-S2                                                          | 2.506                              | 2.324                              | 2.582                              | ∠N4-Ni1-N1       | 80.9                               | 83.1                               | 83.1                               |
| Ni2-N1                                                          | 2.274                              | 2.141                              | 2.311                              | ∠N1-Ni2-N2       | 80.0                               | 83.8                               | 80.5                               |
| Ni2-N2                                                          | 2.278                              | 2.221                              | 2.249                              | ∠N2-Ni2-N3       | 80.4                               | 83.0                               | 81.1                               |
| Ni2-N3                                                          | 2.250                              | 2.145                              | 2.238                              | ∠N3-Ni2-N4       | 81.1                               | 82.7                               | 81.5                               |
| Ni2-N4                                                          | 2.284                              | 2.238                              | 2.265                              | ∠N4-Ni2-N1       | 79.9                               | 83.1                               | 78.9                               |

|                               |       |       |       |                                         |       |       |       |
|-------------------------------|-------|-------|-------|-----------------------------------------|-------|-------|-------|
| <b>C-H<sub>abs</sub>(DHA)</b> | 1.087 | 1.087 | 1.088 | <b>∠S<sub>1</sub>-H-C<sub>DHA</sub></b> | 149.4 | 126.6 | 151.9 |
| <b>S-H<sub>abs</sub>(DHA)</b> | 1.374 | 1.371 | 1.374 | <b>∠H-S<sub>1</sub>-Ni</b>              | 97.2  | 103.5 | 98.6  |

**Table S19-** Computed spin densities and Mulliken charges of complex **3** for all possible spin states of reactants (**R**) along with bond lengths and bond angle obtained from optimized geometries in Gaussian 09.

| <b>Spin Density of reactant (Complex 3)</b>            |                                      |                                      |                                      |                                      |
|--------------------------------------------------------|--------------------------------------|--------------------------------------|--------------------------------------|--------------------------------------|
| <b>Spin Density</b>                                    | <b><sup>5</sup>R<sub>(t,t)</sub></b> | <b><sup>1</sup>R<sub>(t,t)</sub></b> | <b><sup>3</sup>R<sub>(s,t)</sub></b> | <b><sup>1</sup>R<sub>(s,s)</sub></b> |
| <b>Ni1</b>                                             | 1.59                                 | 1.48                                 | 1.47                                 | 0.00                                 |
| <b>Ni2</b>                                             | 1.59                                 | -1.48                                | 0.26                                 | 0.00                                 |
| <b>Se1</b>                                             | 0.14                                 | 0.00                                 | -0.03                                | 0.00                                 |
| <b>Se2</b>                                             | 0.14                                 | 0.00                                 | -0.03                                | 0.00                                 |
| <b>N1a</b>                                             | 0.07                                 | 0.07                                 | 0.07                                 | 0.00                                 |
| <b>N1b</b>                                             | 0.06                                 | 0.05                                 | 0.06                                 | 0.00                                 |
| <b>N1c</b>                                             | 0.07                                 | 0.07                                 | 0.07                                 | 0.00                                 |
| <b>N1d</b>                                             | 0.06                                 | 0.05                                 | 0.06                                 | 0.00                                 |
| <b>N2a</b>                                             | 0.07                                 | -0.07                                | -0.02                                | 0.00                                 |
| <b>N2b</b>                                             | 0.06                                 | -0.05                                | 0.06                                 | 0.00                                 |
| <b>N2c</b>                                             | 0.07                                 | -0.07                                | -0.02                                | 0.00                                 |
| <b>N2d</b>                                             | 0.06                                 | -0.05                                | 0.06                                 | 0.00                                 |
| <b>Mulliken Atomic Charges of Reactant (Complex 3)</b> |                                      |                                      |                                      |                                      |
| <b>Mulliken Charges</b>                                | <b><sup>5</sup>R<sub>(t,t)</sub></b> | <b><sup>1</sup>R<sub>(t,t)</sub></b> | <b><sup>3</sup>R<sub>(s,t)</sub></b> | <b><sup>1</sup>R<sub>(s,s)</sub></b> |
| <b>Ni1</b>                                             | 0.68                                 | 0.66                                 | 0.66                                 | 0.41                                 |
| <b>Ni2</b>                                             | 0.68                                 | 0.66                                 | 0.63                                 | 0.41                                 |
| <b>Se1</b>                                             | -0.48                                | -0.42                                | -0.39                                | -0.40                                |
| <b>Se2</b>                                             | -0.48                                | -0.42                                | -0.39                                | -0.40                                |
| <b>N1a</b>                                             | -0.28                                | -0.28                                | -0.28                                | -0.22                                |
| <b>N1b</b>                                             | -0.22                                | -0.21                                | -0.21                                | -0.19                                |
| <b>N1c</b>                                             | -0.28                                | -0.28                                | -0.28                                | -0.25                                |
| <b>N1d</b>                                             | -0.22                                | -0.21                                | -0.21                                | -0.21                                |
| <b>N2a</b>                                             | -0.28                                | -0.28                                | -0.27                                | -0.22                                |

|                                               |                 |                 |                 |                 |
|-----------------------------------------------|-----------------|-----------------|-----------------|-----------------|
| N2b                                           | -0.22           | -0.21           | -0.21           | -0.19           |
| N2c                                           | -0.28           | -0.28           | -0.27           | -0.25           |
| N2d                                           | -0.22           | -0.21           | -0.21           | -0.19           |
| <b>Bond parameter of reactant (Complex 3)</b> |                 |                 |                 |                 |
| <b>Bond Parameter</b>                         | ${}^5R_{(t,t)}$ | ${}^1R_{(t,t)}$ | ${}^3R_{(s,t)}$ | ${}^1R_{(s,s)}$ |
| Ni1-Ni2                                       | 4.884           | 4.781           | 4.763           | 5.753           |
| Ni1-Se1                                       | 2.749           | 2.699           | 2.696           | 3.703           |
| Ni1-Se2                                       | 2.749           | 2.699           | 2.696           | 2.448           |
| Ni1-N1                                        | 2.204           | 2.210           | 2.207           | 2.541           |
| Ni1-N2                                        | 2.232           | 2.241           | 2.244           | 2.054           |
| Ni1-N3                                        | 2.204           | 2.210           | 2.207           | 2.028           |
| Ni1-N4                                        | 2.231           | 2.241           | 2.244           | 2.054           |
| Se1-Se2                                       | 2.525           | 2.503           | 2.492           | 2.514           |
| Ni2-Se1                                       | 2.749           | 2.699           | 2.679           | 2.448           |
| Ni2-Se2                                       | 2.750           | 2.699           | 2.679           | 3.703           |
| Ni2-N1                                        | 2.204           | 2.210           | 2.215           | 2.541           |
| Ni2-N2                                        | 2.232           | 2.241           | 2.244           | 2.054           |
| Ni2-N3                                        | 2.204           | 2.210           | 2.215           | 2.028           |
| Ni2-N4                                        | 2.231           | 2.241           | 2.244           | 2.054           |
| <b>The bond angle of Reactant (Complex 3)</b> |                 |                 |                 |                 |
| <b>Bond Angle</b>                             | ${}^5R_{(t,t)}$ | ${}^1R_{(t,t)}$ | ${}^3R_{(s,t)}$ | ${}^1R_{(s,s)}$ |
| ∠Ni1-Se1-Se2                                  | 62.7            | 62.4            | 62.5            | 41.1            |
| ∠Ni1-Se2-Se1                                  | 62.7            | 62.4            | 62.5            | 96.5            |
| ∠Ni2-Se1-Se2                                  | 62.7            | 62.4            | 62.3            | 96.5            |
| ∠Ni2-Se2-Se1                                  | 62.7            | 62.4            | 62.3            | 41.1            |
| ∠Ni1-Se1-Ni2                                  | 125.3           | 124.7           | 124.8           | 137.6           |
| ∠Ni1-Se2-Ni2                                  | 125.3           | 124.7           | 124.8           | 137.6           |
| ∠N1-Ni1-N2                                    | 82.4            | 82.3            | 82.3            | 84.1            |
| ∠N2-Ni1-N3                                    | 81.9            | 81.7            | 81.8            | 86.0            |
| ∠N3-Ni1-N4                                    | 82.4            | 82.3            | 82.3            | 86.0            |

|                                           |      |      |      |      |
|-------------------------------------------|------|------|------|------|
| $\angle\text{N}_4\text{-Ni}_1\text{-N}_1$ | 81.9 | 81.7 | 81.8 | 84.1 |
| $\angle\text{N}_1\text{-Ni}_2\text{-N}_2$ | 82.4 | 82.3 | 82.3 | 84.1 |
| $\angle\text{N}_2\text{-Ni}_2\text{-N}_3$ | 81.9 | 81.7 | 81.7 | 86.0 |
| $\angle\text{N}_3\text{-Ni}_2\text{-N}_4$ | 82.4 | 82.3 | 82.3 | 86.0 |
| $\angle\text{N}_4\text{-Ni}_2\text{-N}_1$ | 81.9 | 81.7 | 81.7 | 84.1 |

**Table S20-** Computed spin densities and Mulliken charges of complex **3** for all possible spin states of the first hydrogen abstraction transition state (**TS1**) along with bond lengths and bond angle as obtained from optimized geometries in Gaussian 09.

| Mulliken spin density values of Transition State (TS1) |                   |                   |                   |                   |
|--------------------------------------------------------|-------------------|-------------------|-------------------|-------------------|
| Spin Density                                           | ${}^5tsI_{(t,t)}$ | ${}^1tsI_{(t,t)}$ | ${}^3tsI_{(s,t)}$ | ${}^1tsI_{(s,s)}$ |
| Ni1                                                    | 1.64              | 1.64              | 1.62              | 0.00              |
| Ni2                                                    | 1.56              | -1.63             | -0.03             | 0.00              |
| Se1                                                    | -0.06             | -0.06             | 0.16              | 0.00              |
| Se2                                                    | 0.97              | 0.67              | -0.76             | 0.00              |
| N1a                                                    | 0.06              | 0.08              | 0.08              | 0.00              |
| N1b                                                    | 0.06              | 0.06              | 0.06              | 0.00              |
| N1c                                                    | 0.08              | 0.07              | 0.06              | 0.00              |
| N1d                                                    | 0.06              | 0.06              | 0.06              | 0.00              |
| N2a                                                    | 0.07              | -0.07             | -0.09             | 0.00              |
| N2b                                                    | 0.07              | -0.07             | 0.05              | 0.00              |
| N2c                                                    | 0.07              | -0.06             | 0.05              | 0.00              |
| N2d                                                    | 0.06              | -0.06             | 0.06              | 0.00              |
| CDHA                                                   | -0.48             | -0.48             | 0.48              | 0.00              |
| Mulliken Atomic Charges of for Transition State (TS1)  |                   |                   |                   |                   |
| Spin Density                                           | ${}^5tsI_{(t,t)}$ | ${}^1tsI_{(t,t)}$ | ${}^3tsI_{(s,t)}$ | ${}^1tsI_{(s,s)}$ |
| Ni1                                                    | 0.76              | 0.76              | 0.76              | 0.57              |
| Ni2                                                    | 0.66              | 0.66              | 0.66              | 0.44              |
| Se1                                                    | -0.47             | -0.47             | -0.39             | -0.36             |
| Se2                                                    | -0.56             | -0.59             | -0.63             | -0.73             |
| N1a                                                    | -0.30             | -0.30             | -0.29             | -0.23             |
| N1b                                                    | -0.23             | -0.22             | -0.23             | -0.17             |

|                                   |                   |                   |                   |                   |
|-----------------------------------|-------------------|-------------------|-------------------|-------------------|
| N1c                               | -0.28             | -0.28             | -0.30             | -0.27             |
| N1d                               | -0.22             | -0.23             | -0.21             | -0.20             |
| N2a                               | -0.29             | -0.29             | -0.27             | -0.19             |
| N2b                               | -0.21             | -0.21             | -0.21             | -0.19             |
| N2c                               | -0.29             | -0.29             | -0.30             | -0.26             |
| N2d                               | -0.20             | -0.21             | -0.21             | -0.18             |
| CDHA                              | -0.14             | -0.14             | -0.15             | -0.26             |
| <b>Bond parameter of TS1 in Å</b> |                   |                   |                   |                   |
| <b>Bond Parameter</b>             | ${}^5tsI_{(t,t)}$ | ${}^1tsI_{(t,t)}$ | ${}^3tsI_{(s,t)}$ | ${}^1tsI_{(s,s)}$ |
| Ni1-Ni2                           | 6.847             | 6.847             | 6.580             | 6.201             |
| Ni1-Se1                           | 2.489             | 2.489             | 2.487             | 2.469             |
| Ni1-Se2                           | 4.577             | 4.577             | 4.296             | 3.894             |
| Ni1-N1                            | 2.166             | 2.166             | 2.142             | 2.443             |
| Ni1-N2                            | 2.251             | 2.251             | 2.265             | 2.057             |
| Ni1-N3                            | 2.141             | 2.141             | 2.154             | 2.058             |
| Ni1-N4                            | 2.260             | 2.260             | 2.251             | 2.067             |
| Se1-Se2                           | 3.370             | 3.370             | 3.211             | 3.345             |
| Ni2-Se1                           | 5.153             | 5.153             | 4.946             | 5.054             |
| Ni2-Se2                           | 2.400             | 2.400             | 2.414             | 2.393             |
| Ni2-N1                            | 2.165             | 2.165             | 2.187             | 2.187             |
| Ni2-N2                            | 2.230             | 2.230             | 2.220             | 2.553             |
| Ni2-N3                            | 2.166             | 2.166             | 2.166             | 2.064             |
| Ni2-N4                            | 2.289             | 2.289             | 2.225             | 2.058             |
| C-H <sub>abs</sub> (DHA)          | 1.692             | 1.692             | 1.691             | 2.070             |
| Se-H <sub>abs</sub> (DHA)         | 1.628             | 1.628             | 1.633             | 1.572             |
| <b>The bond angle of TS1</b>      |                   |                   |                   |                   |
| <b>Bond Angle</b>                 | ${}^5tsI_{(t,t)}$ | ${}^1tsI_{(t,t)}$ | ${}^3tsI_{(s,t)}$ | ${}^1tsI_{(s,s)}$ |
| ∠Ni1-Se1-Se2                      | 101.7             | 101.7             | 97.0              | 82.6              |
| ∠Ni1-Se2-Se1                      | 32.2              | 32.2              | 35.1              | 39.0              |
| ∠Ni2-Se1-Se2                      | 22.2              | 22.2              | 24.3              | 23.5              |
| ∠Ni2-Se2-Se1                      | 125.7             | 125.7             | 122.5             | 122.6             |
| ∠Ni1-Se1-Ni2                      | 123.4             | 123.4             | 120.9             | 105.8             |
| ∠Ni1-Se2-Ni2                      | 156.7             | 156.6             | 156.4             | 160.5             |
| ∠N1-Ni1-N2                        | 81.3              | 81.3              | 81.9              | 83.3              |

|                            |       |       |       |       |
|----------------------------|-------|-------|-------|-------|
| $\angle \text{N2-Ni1-N3}$  | 83.6  | 83.5  | 82.7  | 86.2  |
| $\angle \text{N3-Ni1-N4}$  | 82.2  | 82.2  | 82.3  | 85.0  |
| $\angle \text{N4-Ni1-N1}$  | 81.9  | 81.9  | 82.9  | 83.3  |
| $\angle \text{N1-Ni2-N2}$  | 83.0  | 83.0  | 83.5  | 82.5  |
| $\angle \text{N2-Ni2-N3}$  | 82.7  | 82.7  | 82.6  | 85.8  |
| $\angle \text{N3-Ni2-N4}$  | 82.2  | 82.2  | 82.4  | 85.6  |
| $\angle \text{N4-Ni2-N1}$  | 81.6  | 81.6  | 83.8  | 83.4  |
| $\angle \text{Se1-H-CDHA}$ | 163.8 | 163.8 | 159.2 | 154.6 |
| $\angle \text{Ni1-Se1-H}$  | 104.5 | 104.5 | 108.7 | 107.3 |

**Table S21-** Computed spin densities and Mulliken charges of complex **3** for all possible spin states of Intermediate (**Int1**) along with respective bond lengths and bond angles as obtained from optimized geometries in Gaussian 09.

| Mulliken spin density and charges values of Intermediate (Int1) |                         |                         |                         |                             |                         |                         |                         |
|-----------------------------------------------------------------|-------------------------|-------------------------|-------------------------|-----------------------------|-------------------------|-------------------------|-------------------------|
| Spin Density                                                    | $^5\text{Int1}_{(t,t)}$ | $^1\text{Int1}_{(t,t)}$ | $^3\text{Int1}_{(s,t)}$ | Mulliken Charges            | $^5\text{Int1}_{(t,t)}$ | $^1\text{Int1}_{(t,t)}$ | $^3\text{Int1}_{(s,t)}$ |
| Ni1                                                             | 1.62                    | 1.59                    | 1.62                    | Ni1                         | 0.71                    | 0.75                    | 0.65                    |
| Ni2                                                             | 1.56                    | -1.55                   | 0.00                    | Ni2                         | 0.70                    | 0.63                    | 0.63                    |
| Se1                                                             | 0.12                    | 0.27                    | 0.12                    | Se1                         | -0.56                   | -0.30                   | -0.46                   |
| Se2                                                             | 1.13                    | 0.65                    | 0.92                    | Se2                         | -0.50                   | -0.59                   | -0.48                   |
| N1a                                                             | 0.07                    | 0.09                    | 0.07                    | N1a                         | -0.28                   | -0.27                   | -0.29                   |
| N1b                                                             | 0.07                    | 0.06                    | 0.07                    | N1b                         | -0.23                   | -0.22                   | -0.21                   |
| N1c                                                             | 0.07                    | 0.05                    | 0.07                    | N1c                         | -0.29                   | -0.30                   | -0.29                   |
| N1d                                                             | 0.06                    | 0.06                    | 0.06                    | N1d                         | -0.22                   | -0.20                   | -0.20                   |
| N2a                                                             | 0.07                    | -0.06                   | 0.06                    | N2a                         | -0.27                   | -0.25                   | -0.27                   |
| N2b                                                             | 0.07                    | -0.05                   | 0.03                    | N2b                         | -0.22                   | -0.21                   | -0.20                   |
| N2c                                                             | 0.07                    | -0.05                   | -0.07                   | N2c                         | -0.29                   | -0.26                   | -0.29                   |
| N2d                                                             | 0.07                    | -0.05                   | 0.03                    | N2d                         | -0.23                   | -0.20                   | -0.20                   |
| CDHA                                                            | -0.68                   | -0.70                   | -0.68                   | CDHA                        | -0.22                   | -0.27                   | -0.20                   |
| Bond parameters and Bond angles of Intermediate (Int1)          |                         |                         |                         |                             |                         |                         |                         |
| Bond Parameter                                                  | $^5\text{Int1}_{(t,t)}$ | $^1\text{Int1}_{(t,t)}$ | $^3\text{Int1}_{(s,t)}$ | Bond Angle                  | $^5\text{Int1}_{(t,t)}$ | $^1\text{Int1}_{(t,t)}$ | $^3\text{Int1}_{(s,t)}$ |
| Ni1-Ni2                                                         | 6.981                   | 4.845                   | 7.083                   | $\angle \text{Ni1-Se1-Se2}$ | 95.8                    | 44.7                    | 96.7                    |

|                                  |       |       |       |                                                    |       |       |       |
|----------------------------------|-------|-------|-------|----------------------------------------------------|-------|-------|-------|
| Ni <sub>1</sub> -Se <sub>1</sub> | 2.437 | 3.581 | 2.436 | ∠Ni <sub>1</sub> -Se <sub>2</sub> -Se <sub>1</sub> | 26.6  | 79.6  | 26.4  |
| Ni <sub>1</sub> -Se <sub>2</sub> | 5.424 | 2.546 | 5.446 | ∠Ni <sub>2</sub> -Se <sub>1</sub> -Se <sub>2</sub> | 22.2  | 57.0  | 25.8  |
| Ni <sub>1</sub> -N <sub>1</sub>  | 2.141 | 2.164 | 2.141 | ∠Ni <sub>2</sub> -Se <sub>2</sub> -Se <sub>1</sub> | 95.0  | 54.4  | 98.0  |
| Ni <sub>1</sub> -N <sub>2</sub>  | 2.247 | 2.247 | 2.248 | ∠Ni <sub>1</sub> -Se <sub>1</sub> -Ni <sub>2</sub> | 122.1 | 101.3 | 122.5 |
| Ni <sub>1</sub> -N <sub>3</sub>  | 2.144 | 2.207 | 2.143 | ∠Ni <sub>1</sub> -Se <sub>2</sub> -Ni <sub>2</sub> | 121.5 | 133.9 | 124.3 |
| Ni <sub>1</sub> -N <sub>4</sub>  | 2.263 | 2.253 | 2.263 | ∠N <sub>1</sub> -Ni <sub>1</sub> -N <sub>2</sub>   | 82.8  | 83.4  | 82.8  |
| Se <sub>1</sub> -Se <sub>2</sub> | 4.608 | 3.017 | 4.594 | ∠N <sub>2</sub> -Ni <sub>1</sub> -N <sub>3</sub>   | 82.9  | 81.4  | 83.0  |
| Ni <sub>2</sub> -Se <sub>1</sub> | 5.373 | 2.634 | 5.471 | ∠N <sub>3</sub> -Ni <sub>1</sub> -N <sub>4</sub>   | 82.6  | 81.0  | 82.6  |
| Ni <sub>2</sub> -Se <sub>2</sub> | 2.395 | 2.719 | 2.401 | ∠N <sub>4</sub> -Ni <sub>1</sub> -N <sub>1</sub>   | 82.8  | 83.4  | 82.8  |
| Ni <sub>2</sub> -N <sub>1</sub>  | 2.148 | 2.280 | 2.188 | ∠N <sub>1</sub> -Ni <sub>2</sub> -N <sub>2</sub>   | 83.3  | 81.1  | 83.6  |
| Ni <sub>2</sub> -N <sub>2</sub>  | 2.243 | 2.245 | 2.209 | ∠N <sub>2</sub> -Ni <sub>2</sub> -N <sub>3</sub>   | 82.2  | 80.9  | 83.0  |
| Ni <sub>2</sub> -N <sub>3</sub>  | 2.163 | 2.269 | 2.152 | ∠N <sub>3</sub> -Ni <sub>2</sub> -N <sub>4</sub>   | 82.6  | 81.4  | 83.2  |
| Ni <sub>2</sub> -N <sub>4</sub>  | 2.246 | 2.259 | 2.215 | ∠N <sub>4</sub> -Ni <sub>2</sub> -N <sub>1</sub>   | 82.9  | 80.0  | 83.3  |
| C-<br>H <sub>abs</sub> (DHA)     | 3.925 | 3.860 | 3.966 | ∠Se <sub>1</sub> -H-C <sub>DHA</sub>               | 106.8 | 142.9 | 105.3 |
| Se-<br>H <sub>abs</sub> (DHA)    | 1.488 | 1.493 | 1.488 | ∠H-Se <sub>1</sub> -Ni                             | 100.2 | 97.4  | 100.3 |

**Table S22-** Computed spin densities and Mulliken charges of complex **3** for all possible spin states of second hydrogen abstraction transition state from other DHA molecule (**TS2**) along with respective bond lengths and bond angles obtained from optimized geometries in Gaussian 09.

| Mulliken spin density values of Transition State (TS2) |                                   |                                   |                                   |                                   |
|--------------------------------------------------------|-----------------------------------|-----------------------------------|-----------------------------------|-----------------------------------|
| Spin Density                                           | <sup>5</sup> ts2 <sub>(t,t)</sub> | <sup>1</sup> ts2 <sub>(t,t)</sub> | <sup>3</sup> ts2 <sub>(s,t)</sub> | <sup>1</sup> ts2 <sub>(s,s)</sub> |
| Ni1                                                    | 1.57                              | 1.56                              | 1.56                              | 0.00                              |
| Ni2                                                    | 1.57                              | -1.57                             | -0.15                             | 0.00                              |
| Se1                                                    | -0.05                             | -0.06                             | 0.13                              | 0.00                              |
| Se2                                                    | 0.13                              | -0.27                             | -0.02                             | 0.00                              |
| N1a                                                    | 0.06                              | 0.06                              | 0.06                              | 0.00                              |
| N1b                                                    | 0.05                              | 0.05                              | 0.05                              | 0.00                              |
| N1c                                                    | 0.05                              | 0.06                              | 0.05                              | 0.00                              |
| N1d                                                    | 0.05                              | 0.05                              | 0.05                              | 0.00                              |
| N2a                                                    | 0.06                              | -0.06                             | 0.02                              | 0.00                              |
| N2b                                                    | 0.05                              | -0.05                             | -0.06                             | 0.00                              |
| N2c                                                    | 0.06                              | -0.06                             | 0.02                              | 0.00                              |
| N2d                                                    | 0.05                              | -0.05                             | -0.06                             | 0.00                              |

|                                                              |                 |                 |                 |                 |
|--------------------------------------------------------------|-----------------|-----------------|-----------------|-----------------|
| CDHA1                                                        | 0.69            | 0.69            | 0.69            | 0.00            |
| CDHA2                                                        | -0.46           | -0.44           | -0.47           | 0.00            |
| <b>Mulliken Atomic Charges of for Transition State (TS2)</b> |                 |                 |                 |                 |
| <b>Spin Density</b>                                          | $^5ts2_{(t,t)}$ | $^1ts2_{(t,t)}$ | $^3ts2_{(s,t)}$ | $^1ts2_{(s,s)}$ |
| Ni1                                                          | 0.75            | 0.74            | 0.74            | 0.67            |
| Ni2                                                          | 0.78            | 0.79            | 0.76            | 0.71            |
| Se1                                                          | -0.32           | -0.33           | -0.52           | -0.45           |
| Se2                                                          | -0.53           | -0.51           | -0.30           | -0.19           |
| N1a                                                          | -0.26           | -0.26           | -0.26           | -0.25           |
| N1b                                                          | -0.22           | -0.22           | -0.22           | -0.20           |
| N1c                                                          | -0.25           | -0.25           | -0.25           | -0.23           |
| N1d                                                          | -0.22           | -0.22           | -0.21           | -0.19           |
| N2a                                                          | -0.25           | -0.25           | -0.22           | -0.23           |
| N2b                                                          | -0.23           | -0.23           | -0.26           | -0.21           |
| N2c                                                          | -0.26           | -0.26           | -0.21           | -0.25           |
| N2d                                                          | -0.21           | -0.21           | -0.24           | -0.19           |
| CDHA1                                                        | -0.19           | -0.19           | -0.19           | -0.44           |
| CDHA2                                                        | -0.34           | -0.30           | -0.37           | -0.35           |
| <b>Bond parameter of TS2 in Å</b>                            |                 |                 |                 |                 |
| <b>Bond Parameter</b>                                        | $^5ts2_{(t,t)}$ | $^1ts2_{(t,t)}$ | $^3ts2_{(s,t)}$ | $^1ts2_{(s,s)}$ |
| Ni1-Ni2                                                      | 4.468           | 4.502           | 4.500           | 4.523           |
| Ni1-Se1                                                      | 2.696           | 2.683           | 2.707           | 2.688           |
| Ni1-Se2                                                      | 2.756           | 2.782           | 2.743           | 2.758           |
| Ni1-N1                                                       | 2.267           | 2.263           | 2.268           | 2.271           |
| Ni1-N2                                                       | 2.261           | 2.257           | 2.261           | 2.262           |
| Ni1-N3                                                       | 2.323           | 2.309           | 2.321           | 2.347           |
| Ni1-N4                                                       | 2.274           | 2.263           | 2.275           | 2.276           |
| Se1-Se2                                                      | 3.134           | 3.131           | 3.104           | 3.080           |
| Ni2-Se1                                                      | 2.680           | 2.720           | 2.650           | 2.648           |
| Ni2-Se2                                                      | 2.793           | 2.790           | 2.843           | 2.262           |
| Ni2-N1                                                       | 2.317           | 2.304           | 2.350           | 2.346           |
| Ni2-N2                                                       | 2.278           | 2.275           | 2.275           | 2.273           |
| Ni2-N3                                                       | 2.271           | 2.256           | 2.262           | 2.258           |
| Ni2-N4                                                       | 2.266           | 2.264           | 2.265           | 2.262           |



|                                                    |                                          |                                          |                                          |                                          |
|----------------------------------------------------|------------------------------------------|------------------------------------------|------------------------------------------|------------------------------------------|
| C-H <sub>abs</sub> (DHA <sub>1</sub> )             | 4.029                                    | 3.935                                    | 4.176                                    | 4.193                                    |
| Se-H <sub>abs</sub> (DHA <sub>1</sub> )            | 1.494                                    | 1.495                                    | 1.493                                    | 1.492                                    |
| C-H <sub>abs</sub> (DHA <sub>2</sub> )             | 1.651                                    | 1.599                                    | 1.690                                    | 1.735                                    |
| Se-H <sub>abs</sub> (DHA <sub>2</sub> )            | 1.661                                    | 1.688                                    | 1.644                                    | 1.631                                    |
| <b>The bond angle of TS2</b>                       |                                          |                                          |                                          |                                          |
| <b>Bond Angle</b>                                  | <sup>5</sup> <i>ts2</i> <sub>(t,t)</sub> | <sup>1</sup> <i>ts2</i> <sub>(t,t)</sub> | <sup>3</sup> <i>ts2</i> <sub>(s,t)</sub> | <sup>1</sup> <i>ts2</i> <sub>(s,s)</sub> |
| ∠Ni <sub>1</sub> -Se <sub>1</sub> -Se <sub>2</sub> | 55.8                                     | 56.6                                     | 55.8                                     | 56.6                                     |
| ∠Ni <sub>1</sub> -Se <sub>2</sub> -Se <sub>1</sub> | 54.0                                     | 53.6                                     | 54.7                                     | 54.5                                     |
| ∠Ni <sub>2</sub> -Se <sub>1</sub> -Se <sub>2</sub> | 56.8                                     | 56.4                                     | 58.6                                     | 59.4                                     |
| ∠Ni <sub>2</sub> -Se <sub>2</sub> -Se <sub>1</sub> | 53.4                                     | 54.3                                     | 52.7                                     | 52.8                                     |
| ∠Ni <sub>1</sub> -Se <sub>1</sub> -Ni <sub>2</sub> | 112.5                                    | 112.8                                    | 114.3                                    | 115.9                                    |
| ∠Ni <sub>1</sub> -Se <sub>2</sub> -Ni <sub>2</sub> | 107.3                                    | 107.8                                    | 107.3                                    | 107.2                                    |
| ∠N <sub>1</sub> -Ni <sub>1</sub> -N <sub>2</sub>   | 80.8                                     | 80.9                                     | 80.7                                     | 80.9                                     |
| ∠N <sub>2</sub> -Ni <sub>1</sub> -N <sub>3</sub>   | 79.7                                     | 79.9                                     | 80.0                                     | 80.0                                     |
| ∠N <sub>3</sub> -Ni <sub>1</sub> -N <sub>4</sub>   | 79.7                                     | 80.2                                     | 80.0                                     | 80.0                                     |
| ∠N <sub>4</sub> -Ni <sub>1</sub> -N <sub>1</sub>   | 79.9                                     | 80.0                                     | 80.0                                     | 80.2                                     |
| ∠N <sub>1</sub> -Ni <sub>2</sub> -N <sub>2</sub>   | 80.0                                     | 80.1                                     | 79.9                                     | 80.1                                     |
| ∠N <sub>2</sub> -Ni <sub>2</sub> -N <sub>3</sub>   | 80.0                                     | 80.0                                     | 80.2                                     | 80.3                                     |
| ∠N <sub>3</sub> -Ni <sub>2</sub> -N <sub>4</sub>   | 80.7                                     | 80.8                                     | 81.0                                     | 81.1                                     |
| ∠N <sub>4</sub> -Ni <sub>2</sub> -N <sub>1</sub>   | 79.5                                     | 80.0                                     | 79.4                                     | 79.6                                     |
| ∠Se <sub>1</sub> -H-C <sub>DHA1</sub>              | 151.9                                    | 160.2                                    | 147.7                                    | 149.0                                    |
| ∠H-Se <sub>1</sub> -C <sub>DHA1</sub>              | 103.5                                    | 104.9                                    | 103.1                                    | 102.0                                    |
| ∠Se <sub>2</sub> -H-C <sub>DHA2</sub>              | 174.3                                    | 175.4                                    | 173.1                                    | 172.1                                    |
| ∠H-Se <sub>2</sub> -C <sub>DHA2</sub>              | 122.0                                    | 125.7                                    | 121.5                                    | 129.1                                    |

**Table S23-** Computed spin densities and Mulliken charges of complex **3** for all possible spin states of Product (**P**) along with respective bond lengths and angles obtained from optimized geometries in Gaussian 09.

| <b>Mulliken spin density values of Product (P)</b> |                       |                       |                       |                       |                       |
|----------------------------------------------------|-----------------------|-----------------------|-----------------------|-----------------------|-----------------------|
| <b>Spin Density</b>                                | <sup>3</sup> <i>P</i> | <sup>1</sup> <i>P</i> | <b>Charge Density</b> | <sup>3</sup> <i>P</i> | <sup>1</sup> <i>P</i> |
| Ni                                                 | 1.61                  | 0.00                  | Ni                    | 0.64                  | 0.43                  |
| Se                                                 | 0.13                  | 0.00                  | Se                    | -0.44                 | -0.36                 |
| N <sub>1a</sub>                                    | 0.06                  | 0.00                  | N <sub>1a</sub>       | -0.21                 | -0.19                 |
| N <sub>1b</sub>                                    | 0.07                  | 0.00                  | N <sub>1b</sub>       | -0.29                 | -0.21                 |

|                                 |                      |                      |                   |                      |                      |
|---------------------------------|----------------------|----------------------|-------------------|----------------------|----------------------|
| N1c                             | 0.07                 | 0.00                 | N1c               | -0.22                | -0.20                |
| N1d                             | 0.07                 | 0.00                 | N1d               | -0.29                | -0.25                |
| <b>Bond parameter of P in Å</b> |                      |                      |                   |                      |                      |
| <b>Bond Parameter</b>           | <b><sup>3</sup>P</b> | <b><sup>1</sup>P</b> | <b>Bond Angle</b> | <b><sup>3</sup>P</b> | <b><sup>1</sup>P</b> |
| Ni-Se                           | 2.410                | 2.405                | ∠Ni-Se-H          | 100.8                | 100.7                |
| Ni1-N1                          | 2.265                | 2.070                | ∠N1-Ni-N2         | 82.6                 | 83.2                 |
| Ni1-N2                          | 2.152                | 2.551                | ∠N2-Ni-N3         | 82.8                 | 84.5                 |
| Ni1-N3                          | 2.255                | 2.040                | ∠N3-Ni-N4         | 82.8                 | 86.4                 |
| Ni1-N4                          | 2.153                | 2.039                | ∠N4-Ni-N1         | 82.6                 | 86.0                 |

**Table S24-** Computed spin densities and Mulliken charges of complex **4** for all possible spin states of Reactant (R) along with respective bond lengths and bond angles obtained from optimized geometries in Gaussian 09.

| <b>Spin Density of reactant (Complex 4)</b>            |                                      |                                      |                                      |                                      |
|--------------------------------------------------------|--------------------------------------|--------------------------------------|--------------------------------------|--------------------------------------|
| Spin Density                                           | <b><sup>5</sup>R<sub>(t,t)</sub></b> | <b><sup>1</sup>R<sub>(t,t)</sub></b> | <b><sup>3</sup>R<sub>(s,t)</sub></b> | <b><sup>1</sup>R<sub>(s,s)</sub></b> |
| Ni1                                                    | 1.71                                 | 1.43                                 | 1.59                                 | 0.00                                 |
| Ni2                                                    | 1.64                                 | -1.43                                | -0.12                                | 0.00                                 |
| Te1                                                    | 0.10                                 | 0.00                                 | 0.17                                 | 0.00                                 |
| Te2                                                    | 0.14                                 | 0.00                                 | 0.17                                 | 0.00                                 |
| N1a                                                    | -0.01                                | 0.07                                 | 0.06                                 | 0.00                                 |
| N1b                                                    | 0.04                                 | 0.05                                 | 0.06                                 | 0.00                                 |
| N1c                                                    | 0.06                                 | 0.07                                 | 0.06                                 | 0.00                                 |
| N1d                                                    | 0.04                                 | 0.05                                 | 0.06                                 | 0.00                                 |
| N2a                                                    | 0.09                                 | -0.07                                | 0.02                                 | 0.00                                 |
| N2b                                                    | 0.06                                 | -0.05                                | -0.06                                | 0.00                                 |
| N2c                                                    | 0.05                                 | -0.07                                | 0.02                                 | 0.00                                 |
| N2d                                                    | 0.06                                 | -0.05                                | -0.06                                | 0.00                                 |
| <b>Mulliken Atomic Charges of reactant (Complex 4)</b> |                                      |                                      |                                      |                                      |
| Spin Density                                           | <b><sup>5</sup>R<sub>(t,t)</sub></b> | <b><sup>1</sup>R<sub>(t,t)</sub></b> | <b><sup>3</sup>R<sub>(s,t)</sub></b> | <b><sup>1</sup>R<sub>(s,s)</sub></b> |
| Ni1                                                    | 0.63                                 | 0.52                                 | 0.55                                 | 0.37                                 |

|                                                   |                 |                 |                 |                 |
|---------------------------------------------------|-----------------|-----------------|-----------------|-----------------|
| Ni2                                               | 0.61            | 0.52            | 0.53            | 0.37            |
| Te1                                               | -0.48           | -0.15           | -0.37           | -0.38           |
| Te2                                               | -0.46           | -0.15           | -0.37           | -0.38           |
| N1a                                               | -0.29           | -0.26           | -0.26           | -0.21           |
| N1b                                               | -0.23           | -0.23           | -0.20           | -0.18           |
| N1c                                               | -0.30           | -0.26           | -0.26           | -0.26           |
| N1d                                               | -0.22           | -0.23           | -0.20           | -0.19           |
| N2a                                               | -0.26           | -0.26           | -0.26           | -0.22           |
| N2b                                               | -0.21           | -0.23           | -0.19           | -0.18           |
| N2c                                               | -0.31           | -0.26           | -0.26           | -0.26           |
| N2d                                               | -0.21           | -0.23           | -0.19           | -0.18           |
| <b>Bond parameter of reactant (Complex 4)</b>     |                 |                 |                 |                 |
| <b>Bond Parameter</b>                             | ${}^5R_{(t,t)}$ | ${}^1R_{(t,t)}$ | ${}^3R_{(s,t)}$ | ${}^1R_{(s,s)}$ |
| Ni1-Ni2                                           | 6.083           | 5.033           | 4.988           | 6.219           |
| Ni1-Te1                                           | 3.912           | 2.885           | 2.875           | 4.049           |
| Ni1-Te2                                           | 2.719           | 2.885           | 2.875           | 2.665           |
| Ni1-N1                                            | 2.136           | 2.228           | 2.226           | 2.476           |
| Ni1-N2                                            | 2.246           | 2.239           | 2.242           | 2.066           |
| Ni1-N3                                            | 2.185           | 2.228           | 2.226           | 2.053           |
| Ni1-N4                                            | 2.241           | 2.239           | 2.242           | 2.071           |
| Te1-Te2                                           | 2.882           | 2.823           | 2.808           | 2.859           |
| Ni2-Te1                                           | 2.719           | 2.885           | 2.849           | 2.653           |
| Ni2-Te2                                           | 3.910           | 2.885           | 2.849           | 4.047           |
| Ni2-N1                                            | 2.135           | 2.228           | 2.238           | 2.479           |
| Ni2-N2                                            | 2.246           | 2.239           | 2.245           | 2.069           |
| Ni2-N3                                            | 2.185           | 2.228           | 2.238           | 2.052           |
| Ni2-N4                                            | 2.241           | 2.239           | 2.245           | 2.069           |
| <b>The bond angle of the reactant (Complex 4)</b> |                 |                 |                 |                 |
| <b>Bond Angle</b>                                 | ${}^5R_{(t,t)}$ | ${}^1R_{(t,t)}$ | ${}^3R_{(s,t)}$ | ${}^1R_{(s,s)}$ |
| $\angle$ Ni1-Te1-Te2                              | 44.0            | 60.7            | 60.8            | 40.8            |

|                                             |       |       |       |       |
|---------------------------------------------|-------|-------|-------|-------|
| $\angle\text{Ni}_1\text{-Te}_2\text{-Te}_1$ | 88.5  | 60.7  | 60.8  | 94.4  |
| $\angle\text{Ni}_2\text{-Te}_1\text{-Te}_2$ | 88.5  | 60.7  | 60.5  | 94.4  |
| $\angle\text{Ni}_2\text{-Te}_2\text{-Te}_1$ | 44.0  | 60.7  | 60.5  | 40.8  |
| $\angle\text{Te}_1\text{-Ni}_1\text{-Te}_2$ | 47.4  | 58.6  | 58.5  | 44.8  |
| $\angle\text{Te}_1\text{-Ni}_2\text{-Te}_2$ | 47.5  | 58.6  | 59.0  | 44.8  |
| $\angle\text{Ni}_1\text{-Te}_1\text{-Ni}_2$ | 132.3 | 121.4 | 121.3 | 135.2 |
| $\angle\text{Ni}_1\text{-Te}_2\text{-Ni}_2$ | 132.3 | 121.4 | 121.3 | 135.2 |
| $\angle\text{N}_1\text{-Ni}_1\text{-N}_2$   | 84.5  | 82.3  | 82.3  | 84.3  |
| $\angle\text{N}_2\text{-Ni}_1\text{-N}_3$   | 81.2  | 81.9  | 81.9  | 85.5  |
| $\angle\text{N}_3\text{-Ni}_1\text{-N}_4$   | 81.8  | 82.3  | 82.3  | 85.5  |
| $\angle\text{N}_4\text{-Ni}_1\text{-N}_1$   | 84.3  | 81.9  | 81.9  | 81.8  |
| $\angle\text{N}_1\text{-Ni}_2\text{-N}_2$   | 84.6  | 82.3  | 82.3  | 84.4  |
| $\angle\text{N}_2\text{-Ni}_2\text{-N}_3$   | 81.2  | 81.9  | 81.9  | 85.5  |
| $\angle\text{N}_3\text{-Ni}_2\text{-N}_4$   | 81.8  | 82.3  | 82.3  | 85.5  |
| $\angle\text{N}_4\text{-Ni}_2\text{-N}_1$   | 84.3  | 81.9  | 81.9  | 84.2  |

**Table S25-** Computed spin densities and Mulliken charges of complex **4** for all possible spin states of the first hydrogen abstraction transition state (**TS1**) along with respective bond lengths and bond angle as obtained from optimized geometries in Gaussian 09.

| Mulliken spin density and charges values of the transition state (TS1) |                 |                 |                 |                  |                 |                 |                 |
|------------------------------------------------------------------------|-----------------|-----------------|-----------------|------------------|-----------------|-----------------|-----------------|
| Spin Density                                                           | $^5tsI_{(t,t)}$ | $^1tsI_{(t,t)}$ | $^3tsI_{(s,t)}$ | Mulliken Charges | $^5tsI_{(t,t)}$ | $^1tsI_{(t,t)}$ | $^3tsI_{(s,t)}$ |
| Ni1                                                                    | 1.32            | 1.63            | 1.63            | Ni1              | 0.70            | 0.70            | 0.69            |
| Ni2                                                                    | 1.60            | -1.63           | -0.09           | Ni2              | 0.73            | 0.65            | 0.63            |
| Te1                                                                    | 0.06            | 0.01            | 0.10            | Te1              | -0.15           | -0.37           | 0.04            |
| Te2                                                                    | -0.03           | 0.64            | 0.98            | Te2              | -0.57           | -0.56           | -0.52           |
| N1a                                                                    | 0.05            | 0.07            | 0.05            | N1a              | -0.28           | -0.27           | -0.30           |
| N1b                                                                    | 0.04            | 0.06            | 0.06            | N1b              | -0.20           | -0.22           | -0.21           |
| N1c                                                                    | 0.04            | 0.07            | 0.08            | N1c              | -0.28           | -0.27           | -0.28           |
| N1d                                                                    | 0.04            | 0.06            | 0.06            | N1d              | -0.22           | -0.24           | -0.21           |
| N2a                                                                    | 0.07            | -0.07           | -0.04           | N2a              | -0.29           | -0.27           | -0.28           |
| N2b                                                                    | 0.06            | -0.06           | -0.04           | N2b              | -0.21           | -0.23           | -0.20           |
| N2c                                                                    | 0.07            | -0.07           | 0.06            | N2c              | -0.30           | -0.28           | -0.29           |

| N2d                                                                  | 0.06              | -0.05             | -0.03             | N2d                  | -0.21             | -0.22             | -0.20             |
|----------------------------------------------------------------------|-------------------|-------------------|-------------------|----------------------|-------------------|-------------------|-------------------|
| CDHA                                                                 | 0.44              | -0.48             | -0.62             | CDHA                 | -0.16             | -0.36             | -0.28             |
| <b>Bond parameters and Bond angles of the transition state (TS1)</b> |                   |                   |                   |                      |                   |                   |                   |
| Bond Parameter                                                       | ${}^5tsI_{(t,t)}$ | ${}^1tsI_{(t,t)}$ | ${}^3tsI_{(s,t)}$ | Bond Angle           | ${}^5tsI_{(t,t)}$ | ${}^1tsI_{(t,t)}$ | ${}^3tsI_{(s,t)}$ |
| Ni1-Ni2                                                              | 6.861             | 7.248             | 7.216             | $\angle Ni1-Te1-Te2$ | 110.1             | 98.9              | 95.7              |
| Ni1-Te1                                                              | 2.630             | 2.656             | 2.667             | $\angle Ni1-Te2-Te1$ | 32.5              | 33.3              | 34.0              |
| Ni1-Te2                                                              | 4.591             | 4.781             | 2.746             | $\angle Ni2-Te1-Te2$ | 28.5              | 23.2              | 21.4              |
| Ni1-N1                                                               | 2.185             | 2.147             | 2.163             | $\angle Ni2-Te2-Te1$ | 118.9             | 118.6             | 127.0             |
| Ni1-N2                                                               | 2.249             | 2.278             | 2.259             | $\angle Ni1-Te1-Ni2$ | 131.6             | 122.1             | 117.1             |
| Ni1-N3                                                               | 2.211             | 2.157             | 2.144             | $\angle Ni1-Te2-Ni2$ | 141.9             | 157.3             | 160.9             |
| Ni1-N4                                                               | 2.290             | 2.257             | 2.284             | $\angle N1-Ni1-N2$   | 83.4              | 82.0              | 81.5              |
| Te1-Te2                                                              | 2.967             | 3.585             | 3.669             | $\angle N2-Ni1-N3$   | 82.5              | 82.5              | 83.2              |
| Ni2-Te1                                                              | 4.828             | 5.480             | 5.599             | $\angle N3-Ni1-N4$   | 82.1              | 81.7              | 82.0              |
| Ni2-Te2                                                              | 2.635             | 2.599             | 2.562             | $\angle N4-Ni1-N1$   | 82.5              | 82.8              | 81.7              |
| Ni2-N1                                                               | 2.149             | 2.159             | 2.198             | $\angle N1-Ni2-N2$   | 82.7              | 83.0              | 82.1              |
| Ni2-N2                                                               | 2.253             | 2.254             | 2.275             | $\angle N2-Ni2-N3$   | 82.5              | 82.0              | 82.0              |
| Ni2-N3                                                               | 2.160             | 2.177             | 2.191             | $\angle N3-Ni2-N4$   | 82.2              | 81.6              | 81.5              |
| Ni2-N4                                                               | 2.303             | 2.295             | 2.294             | $\angle N4-Ni2-N1$   | 81.9              | 82.1              | 82.1              |
| C-<br>Habs(DHA)                                                      | 1.792             | 1.819             | 2.155             | $\angle Te1-H-CDHA$  | 172.3             | 159.4             | 149.4             |
| Te-<br>Habs(DHA)                                                     | 1.782             | 1.787             | 1.736             | $\angle H-Te1-Ni$    | 109.9             | 98.1              | 96.7              |

**Table S26-** Computed spin densities and Mulliken charges of complex **4** for all possible spin states of Intermediate (**Int1**) along with respective bond lengths and bond angles as obtained from optimized geometries in Gaussian 09.

| <b>Mulliken spin density and charges values of intermediate (Int1)</b> |                    |                    |                    |                  |                    |                    |                    |
|------------------------------------------------------------------------|--------------------|--------------------|--------------------|------------------|--------------------|--------------------|--------------------|
| Spin Density                                                           | ${}^5IntI_{(t,t)}$ | ${}^1IntI_{(t,t)}$ | ${}^3IntI_{(s,t)}$ | Mulliken Charges | ${}^5IntI_{(t,t)}$ | ${}^1IntI_{(t,t)}$ | ${}^3IntI_{(s,t)}$ |
| Ni1                                                                    | 1.47               | 1.54               | 1.66               | Ni1              | 0.70               | 0.68               | 0.69               |
| Ni2                                                                    | 1.61               | -1.57              | 0.04               | Ni2              | 0.66               | 0.64               | 0.62               |
| Te1                                                                    | -0.10              | -0.09              | 0.30               | Te1              | -0.18              | -0.22              | -0.24              |
| Te2                                                                    | -0.45              | -0.88              | 0.67               | Te2              | -0.69              | -0.64              | -0.65              |
| N1a                                                                    | 0.07               | 0.07               | 0.07               | N1a              | -0.28              | -0.29              | -0.29              |
| N1b                                                                    | 0.05               | 0.06               | 0.06               | N1b              | -0.20              | -0.20              | -0.20              |

|                                                               |                                         |                                         |                                         |                         |                                         |                                         |                                         |
|---------------------------------------------------------------|-----------------------------------------|-----------------------------------------|-----------------------------------------|-------------------------|-----------------------------------------|-----------------------------------------|-----------------------------------------|
| N1c                                                           | 0.05                                    | 0.06                                    | 0.07                                    | N1c                     | -0.29                                   | -0.29                                   | -0.29                                   |
| N1d                                                           | 0.05                                    | 0.06                                    | 0.06                                    | N1d                     | -0.16                                   | -0.21                                   | -0.21                                   |
| N2a                                                           | 0.06                                    | -0.07                                   | -0.07                                   | N2a                     | -0.29                                   | -0.29                                   | -0.29                                   |
| N2b                                                           | 0.06                                    | -0.06                                   | 0.03                                    | N2b                     | -0.20                                   | -0.20                                   | -0.19                                   |
| N2c                                                           | 0.06                                    | -0.06                                   | 0.06                                    | N2c                     | -0.29                                   | -0.28                                   | -0.28                                   |
| N2d                                                           | 0.06                                    | -0.05                                   | 0.01                                    | N2d                     | -0.20                                   | -0.20                                   | -0.19                                   |
| CDHA                                                          | 0.69                                    | 0.68                                    | -0.68                                   | CDHA                    | -0.16                                   | -0.18                                   | -0.18                                   |
| <b>Bond parameters and Bond angles of intermediate (Int1)</b> |                                         |                                         |                                         |                         |                                         |                                         |                                         |
| <b>Bond Parameter</b>                                         | <b><sup>5</sup>Int1<sub>(t,t)</sub></b> | <b><sup>1</sup>Int1<sub>(t,t)</sub></b> | <b><sup>3</sup>Int1<sub>(s,t)</sub></b> | <b>Bond Angle</b>       | <b><sup>5</sup>Int1<sub>(t,t)</sub></b> | <b><sup>1</sup>Int1<sub>(t,t)</sub></b> | <b><sup>3</sup>Int1<sub>(s,t)</sub></b> |
| Ni1-Ni2                                                       | 7.199                                   | 7.352                                   | 7.360                                   | ∠Ni1-Te1-Te2            | 108.6                                   | 110.1                                   | 108.8                                   |
| Ni1-Te1                                                       | 2.623                                   | 2.617                                   | 2.618                                   | ∠Ni1-Te2-Te1            | 31.4                                    | 32.5                                    | 30.0                                    |
| Ni1-Te2                                                       | 4.774                                   | 4.972                                   | 4.957                                   | ∠Ni2-Te1-Te2            | 26.1                                    | 28.5                                    | 24.6                                    |
| Ni1-N1                                                        | 2.149                                   | 2.143                                   | 2.142                                   | ∠Ni2-Te2-Te1            | 121.1                                   | 118.9                                   | 122.0                                   |
| Ni1-N2                                                        | 2.266                                   | 2.262                                   | 2.262                                   | ∠Ni1-Te1-Ni2            | 134.3                                   | 131.5                                   | 133.3                                   |
| Ni1-N3                                                        | 2.175                                   | 2.155                                   | 2.156                                   | ∠Ni1-Te2-Ni2            | 151.9                                   | 141.9                                   | 151.4                                   |
| Ni1-N4                                                        | 2.271                                   | 2.271                                   | 2.270                                   | ∠N1-Ni1-N2              | 83.3                                    | 83.4                                    | 83.2                                    |
| Te1-Te2                                                       | 3.240                                   | 3.484                                   | 3.449                                   | ∠N2-Ni1-N3              | 82.5                                    | 82.5                                    | 82.5                                    |
| Ni2-Te1                                                       | 5.118                                   | 5.308                                   | 5.314                                   | ∠N3-Ni1-N4              | 82.2                                    | 82.0                                    | 82.5                                    |
| Ni2-Te2                                                       | 2.628                                   | 2.603                                   | 2.608                                   | ∠N4-Ni1-N1              | 83.2                                    | 82.5                                    | 83.0                                    |
| Ni2-N1                                                        | 2.155                                   | 2.164                                   | 2.164                                   | ∠N1-Ni2-N2              | 82.2                                    | 82.7                                    | 82.7                                    |
| Ni2-N2                                                        | 2.258                                   | 2.245                                   | 2.226                                   | ∠N2-Ni2-N3              | 82.5                                    | 82.5                                    | 83.1                                    |
| Ni2-N3                                                        | 2.160                                   | 2.169                                   | 2.197                                   | ∠N3-Ni2-N4              | 82.2                                    | 82.1                                    | 82.5                                    |
| Ni2-N4                                                        | 2.289                                   | 2.302                                   | 2.266                                   | ∠N4-Ni2-N1              | 82.2                                    | 81.9                                    | 82.3                                    |
| C-<br>H <sub>abs</sub> (DHA)                                  | 3.322                                   | 3.583                                   | 3.516                                   | ∠Te1-H-C <sub>DHA</sub> | 157.4                                   | 173.6                                   | 157.4                                   |
| Te-<br>H <sub>abs</sub> (DHA)                                 | 1.661                                   | 1.660                                   | 1.660                                   | ∠H-Te1-Ni               | 98.7                                    | 110.0                                   | 99.2                                    |

**Table S27-** Optimized geometries of ground state reactant, transition state, intermediate, and product complex of complexes **1-4**.

**1-<sup>1</sup>R<sub>(t,t)</sub>**

|    |             |              |              |
|----|-------------|--------------|--------------|
| Ni | 1.904918000 | 0.000148000  | -0.000128000 |
| N  | 3.237094000 | 0.778927000  | -1.543735000 |
| N  | 2.464893000 | -1.978066000 | -1.003106000 |
| N  | 3.235775000 | -0.778872000 | 1.544635000  |
| C  | 4.124221000 | -0.323749000 | -1.985766000 |
| H  | 4.921116000 | -0.432841000 | -1.248344000 |
| H  | 4.613448000 | -0.077965000 | -2.940426000 |
| C  | 3.349600000 | -1.631229000 | -2.154831000 |
| H  | 2.711471000 | -1.552114000 | -3.038253000 |
| H  | 4.058831000 | -2.446527000 | -2.358364000 |
| C  | 3.161696000 | -2.769667000 | 0.045580000  |
| H  | 3.793485000 | -3.550931000 | -0.403096000 |
| H  | 2.391535000 | -3.285965000 | 0.624989000  |
| C  | 4.013456000 | -1.914823000 | 0.982627000  |
| H  | 4.412131000 | -2.550839000 | 1.786310000  |
| H  | 4.876195000 | -1.509372000 | 0.452111000  |
| C  | 2.396057000 | 1.247867000  | -2.672976000 |
| H  | 1.751459000 | 2.062756000  | -2.342403000 |
| H  | 3.022147000 | 1.600177000  | -3.505095000 |
| C  | 1.322577000 | -2.758365000 | -1.528477000 |
| H  | 1.659662000 | -3.653432000 | -2.071215000 |
| H  | 0.731895000 | -2.122519000 | -2.188085000 |
| H  | 0.686486000 | -3.068702000 | -0.700481000 |
| C  | 2.393867000 | -1.247660000 | 2.673257000  |
| N  | 2.464309000 | 1.978243000  | 1.003165000  |
| C  | 4.014537000 | 1.914794000  | -0.981201000 |
| H  | 4.876848000 | 1.509258000  | -0.450042000 |
| H  | 4.413874000 | 2.550722000  | -1.784623000 |
| C  | 3.162209000 | 2.769807000  | -0.044806000 |
| H  | 2.392706000 | 3.286412000  | -0.624819000 |

|    |              |              |              |
|----|--------------|--------------|--------------|
| H  | 3.793856000  | 3.550824000  | 0.404497000  |
| C  | 3.347926000  | 1.631222000  | 2.155700000  |
| H  | 4.056961000  | 2.446509000  | 2.359951000  |
| H  | 2.708955000  | 1.552022000  | 3.038507000  |
| C  | 4.122662000  | 0.323753000  | 1.987201000  |
| H  | 4.611276000  | 0.078016000  | 2.942189000  |
| H  | 4.919997000  | 0.432803000  | 1.250250000  |
| H  | 1.751256000  | 0.440315000  | -3.021009000 |
| C  | 1.321537000  | 2.758519000  | 1.527592000  |
| H  | 1.658122000  | 3.652981000  | 2.071625000  |
| H  | 0.686818000  | 3.069904000  | 0.698932000  |
| H  | 0.729657000  | 2.122221000  | 2.185713000  |
| H  | 3.019325000  | -1.600161000 | 3.505770000  |
| H  | 1.749017000  | -0.439971000 | 3.020862000  |
| H  | 1.749257000  | -2.062310000 | 2.342169000  |
| O  | 0.000561000  | -0.001424000 | 0.749977000  |
| O  | -0.000512000 | -0.001192000 | -0.750011000 |
| Ni | -1.904876000 | 0.000149000  | 0.000122000  |
| N  | -3.237069000 | 0.778800000  | 1.543804000  |
| N  | -2.464925000 | -1.978154000 | 1.002975000  |
| N  | -3.235765000 | -0.778726000 | -1.544699000 |
| C  | -4.124330000 | -0.323871000 | 1.985576000  |
| H  | -4.921136000 | -0.432803000 | 1.248034000  |
| H  | -4.613666000 | -0.078173000 | 2.940203000  |
| C  | -3.349841000 | -1.631438000 | 2.154577000  |
| H  | -2.711891000 | -1.552518000 | 3.038145000  |
| H  | -4.059178000 | -2.446712000 | 2.357840000  |
| C  | -3.161506000 | -2.769696000 | -0.045896000 |
| H  | -3.793188000 | -3.551156000 | 0.402593000  |
| H  | -2.391199000 | -3.285743000 | -0.625336000 |
| C  | -4.013341000 | -1.914838000 | -0.982854000 |
| H  | -4.411918000 | -2.550793000 | -1.786632000 |
| H  | -4.876142000 | -1.509559000 | -0.452310000 |



|                   |              |              |              |
|-------------------|--------------|--------------|--------------|
| C                 | -2.396066000 | 1.247465000  | 2.673185000  |
| H                 | -1.751467000 | 2.062443000  | 2.342826000  |
| H                 | -1.751272000 | 0.439835000  | 3.021046000  |
| C                 | -1.322674000 | -2.758466000 | 1.528464000  |
| H                 | -1.659826000 | -3.653632000 | 2.071000000  |
| H                 | -0.732162000 | -2.122704000 | 2.188304000  |
| H                 | -0.686389000 | -3.068642000 | 0.700558000  |
| C                 | -2.393910000 | -1.247259000 | -2.673470000 |
| H                 | -3.019410000 | -1.599536000 | -3.506047000 |
| H                 | -1.749324000 | -2.062020000 | -2.342605000 |
| H                 | -1.749043000 | -0.439508000 | -3.020899000 |
| N                 | -2.464301000 | 1.978343000  | -1.003024000 |
| C                 | -4.014386000 | 1.914844000  | 0.981438000  |
| H                 | -4.876768000 | 1.509497000  | 0.450251000  |
| H                 | -4.413613000 | 2.550716000  | 1.784956000  |
| C                 | -3.161970000 | 2.769858000  | 0.045132000  |
| H                 | -2.392315000 | 3.286201000  | 0.625177000  |
| H                 | -3.793497000 | 3.551079000  | -0.403986000 |
| C                 | -3.348131000 | 1.631454000  | -2.155437000 |
| H                 | -4.057253000 | 2.446731000  | -2.359425000 |
| H                 | -2.709336000 | 1.552431000  | -3.038387000 |
| C                 | -4.122764000 | 0.323914000  | -1.987001000 |
| H                 | -4.611494000 | 0.078278000  | -2.941957000 |
| H                 | -4.920007000 | 0.432822000  | -1.249929000 |
| H                 | -3.022182000 | 1.599579000  | 3.505369000  |
| C                 | -1.321588000 | 2.758621000  | -1.527572000 |
| H                 | -1.658237000 | 3.653182000  | -2.071406000 |
| H                 | -0.686673000 | 3.069845000  | -0.699004000 |
| H                 | -0.729882000 | 2.122399000  | -2.185922000 |
| <br>              |              |              |              |
| $2^{-1}R_{(t,t)}$ |              |              |              |
| Ni                | -2.316288000 | -0.000004000 | 0.000091000  |
| N                 | -3.636493000 | -0.176341000 | -1.745223000 |

|   |              |              |              |
|---|--------------|--------------|--------------|
| N | -2.846677000 | 2.173846000  | -0.206955000 |
| N | -3.636345000 | 0.176329000  | 1.745523000  |
| C | -4.357277000 | 1.112897000  | -1.914419000 |
| H | -5.244359000 | 1.107722000  | -1.278511000 |
| H | -4.716662000 | 1.226264000  | -2.946739000 |
| C | -3.449288000 | 2.285778000  | -1.564177000 |
| H | -2.621389000 | 2.331319000  | -2.276780000 |
| H | -4.009914000 | 3.227272000  | -1.662038000 |
| C | -3.815771000 | 2.504624000  | 0.882541000  |
| H | -4.544927000 | 3.251200000  | 0.538427000  |
| H | -3.250433000 | 2.977340000  | 1.688536000  |
| C | -4.562990000 | 1.292981000  | 1.441538000  |
| H | -5.116041000 | 1.602322000  | 2.341271000  |
| H | -5.304695000 | 0.928406000  | 0.729620000  |
| C | -2.854345000 | -0.474964000 | -2.972841000 |
| H | -2.225884000 | -1.351643000 | -2.817663000 |
| H | -3.528218000 | -0.652103000 | -3.822932000 |
| C | -1.707204000 | 3.114961000  | -0.133089000 |
| H | -2.034243000 | 4.154017000  | -0.283204000 |
| H | -0.981235000 | 2.841659000  | -0.897891000 |
| H | -1.231409000 | 3.022215000  | 0.843330000  |
| C | -2.854079000 | 0.474962000  | 2.973064000  |
| N | -2.846638000 | -2.173843000 | 0.207201000  |
| C | -4.563100000 | -1.292999000 | -1.441148000 |
| H | -5.304741000 | -0.928428000 | -0.729163000 |
| H | -5.116232000 | -1.602348000 | -2.340829000 |
| C | -3.815818000 | -2.504633000 | -0.882216000 |
| H | -3.250542000 | -2.977341000 | -1.688258000 |
| H | -4.544937000 | -3.251217000 | -0.538042000 |
| C | -3.449135000 | -2.285787000 | 1.564473000  |
| H | -4.009748000 | -3.227286000 | 1.662375000  |
| H | -2.621179000 | -2.331327000 | 2.277008000  |
| C | -4.357104000 | -1.112912000 | 1.914791000  |

|    |              |              |              |
|----|--------------|--------------|--------------|
| H  | -4.716395000 | -1.226278000 | 2.947143000  |
| H  | -5.244242000 | -1.107749000 | 1.278963000  |
| H  | -2.196665000 | 0.363240000  | -3.204266000 |
| C  | -1.707153000 | -3.114937000 | 0.133233000  |
| H  | -2.034159000 | -4.154000000 | 0.283372000  |
| H  | -1.231443000 | -3.022174000 | -0.843224000 |
| H  | -0.981124000 | -2.841625000 | 0.897975000  |
| H  | -3.527870000 | 0.652113000  | 3.823218000  |
| H  | -2.196379000 | -0.363242000 | 3.204435000  |
| H  | -2.225628000 | 1.351635000  | 2.817816000  |
| S  | 0.000090000  | 0.000018000  | 1.072142000  |
| S  | -0.000091000 | 0.000031000  | -1.072145000 |
| Ni | 2.316288000  | -0.000004000 | -0.000091000 |
| N  | 3.636492000  | -0.176360000 | 1.745222000  |
| N  | 2.846678000  | 2.173843000  | 0.206980000  |
| N  | 3.636346000  | 0.176348000  | -1.745521000 |
| C  | 4.357279000  | 1.112875000  | 1.914431000  |
| H  | 5.244360000  | 1.107706000  | 1.278523000  |
| H  | 4.716663000  | 1.226232000  | 2.946752000  |
| C  | 3.449290000  | 2.285761000  | 1.564202000  |
| H  | 2.621393000  | 2.331298000  | 2.276806000  |
| H  | 4.009919000  | 3.227254000  | 1.662071000  |
| C  | 3.815769000  | 2.504634000  | -0.882515000 |
| H  | 4.544925000  | 3.251207000  | -0.538395000 |
| H  | 3.250431000  | 2.977356000  | -1.688505000 |
| C  | 4.562990000  | 1.292998000  | -1.441524000 |
| H  | 5.116040000  | 1.602348000  | -2.341255000 |
| H  | 5.304695000  | 0.928416000  | -0.729610000 |
| C  | 2.854343000  | -0.474995000 | 2.972836000  |
| H  | 2.225882000  | -1.351672000 | 2.817649000  |
| H  | 2.196664000  | 0.363208000  | 3.204269000  |
| C  | 1.707204000  | 3.114959000  | 0.133124000  |
| H  | 2.034242000  | 4.154013000  | 0.283250000  |

|   |             |              |              |
|---|-------------|--------------|--------------|
| H | 0.981236000 | 2.841648000  | 0.897924000  |
| H | 1.231407000 | 3.022222000  | -0.843295000 |
| C | 2.854080000 | 0.474992000  | -2.973059000 |
| H | 3.527871000 | 0.652151000  | -3.823212000 |
| H | 2.225629000 | 1.351664000  | -2.817803000 |
| H | 2.196380000 | -0.363209000 | -3.204439000 |
| N | 2.846638000 | -2.173841000 | -0.207225000 |
| C | 4.563098000 | -1.293016000 | 1.441136000  |
| H | 5.304741000 | -0.928439000 | 0.729156000  |
| H | 5.116229000 | -1.602375000 | 2.340815000  |
| C | 3.815816000 | -2.504643000 | 0.882191000  |
| H | 3.250538000 | -2.977358000 | 1.688227000  |
| H | 4.544934000 | -3.251225000 | 0.538010000  |
| C | 3.449137000 | -2.285771000 | -1.564496000 |
| H | 4.009752000 | -3.227267000 | -1.662407000 |
| H | 2.621182000 | -2.331305000 | -2.277034000 |
| C | 4.357106000 | -1.112891000 | -1.914802000 |
| H | 4.716398000 | -1.226246000 | -2.947155000 |
| H | 5.244244000 | -1.107734000 | -1.278973000 |
| H | 3.528216000 | -0.652142000 | 3.822926000  |
| C | 1.707152000 | -3.114934000 | -0.133269000 |
| H | 2.034157000 | -4.153996000 | -0.283418000 |
| H | 1.231440000 | -3.022182000 | 0.843189000  |
| H | 0.981123000 | -2.841613000 | -0.898009000 |

$3^{-1}\mathbf{R}_{(t,t)}$

|    |             |              |              |
|----|-------------|--------------|--------------|
| Ni | 2.390718000 | -0.000005000 | -0.000096000 |
| N  | 3.720378000 | -0.126203000 | 1.760754000  |
| N  | 2.910096000 | 2.175727000  | 0.143005000  |
| N  | 3.720242000 | 0.126116000  | -1.761053000 |
| C  | 4.433178000 | 1.174259000  | 1.878051000  |
| H  | 5.315531000 | 1.155632000  | 1.236347000  |
| H  | 4.799324000 | 1.325872000  | 2.902924000  |

|   |             |              |              |
|---|-------------|--------------|--------------|
| C | 3.509814000 | 2.326312000  | 1.498207000  |
| H | 2.678868000 | 2.375532000  | 2.206919000  |
| H | 4.057460000 | 3.277490000  | 1.574261000  |
| C | 3.885617000 | 2.473807000  | -0.951163000 |
| H | 4.608665000 | 3.234720000  | -0.625940000 |
| H | 3.323150000 | 2.917225000  | -1.775573000 |
| C | 4.643165000 | 1.248909000  | -1.467361000 |
| H | 5.210590000 | 1.537801000  | -2.364986000 |
| H | 5.373589000 | 0.901818000  | -0.735967000 |
| C | 2.981755000 | -0.394361000 | 3.022770000  |
| H | 2.358198000 | -1.282199000 | 2.920278000  |
| H | 3.688580000 | -0.539185000 | 3.852059000  |
| C | 1.774875000 | 3.122791000  | 0.037330000  |
| H | 2.114097000 | 4.163257000  | 0.143051000  |
| H | 1.050663000 | 2.891678000  | 0.818377000  |
| H | 1.289891000 | 2.994540000  | -0.930935000 |
| C | 2.981533000 | 0.394347000  | -3.023002000 |
| N | 2.909897000 | -2.175717000 | -0.143243000 |
| C | 4.643178000 | -1.249079000 | 1.466989000  |
| H | 5.373572000 | -0.902051000 | 0.735535000  |
| H | 5.210654000 | -1.538020000 | 2.364566000  |
| C | 3.885474000 | -2.473909000 | 0.950846000  |
| H | 3.323035000 | -2.917279000 | 1.775299000  |
| H | 4.608421000 | -3.234888000 | 0.625557000  |
| C | 3.509489000 | -2.326385000 | -1.498491000 |
| H | 4.057043000 | -3.277614000 | -1.574573000 |
| H | 2.678481000 | -2.375549000 | -2.207134000 |
| C | 4.432922000 | -1.174409000 | -1.878422000 |
| H | 4.798956000 | -1.326049000 | -2.903330000 |
| H | 5.315337000 | -1.155860000 | -1.236803000 |
| H | 2.327149000 | 0.445858000  | 3.255845000  |
| C | 1.774531000 | -3.122619000 | -0.037481000 |
| H | 2.113598000 | -4.163135000 | -0.143183000 |

|    |              |              |              |
|----|--------------|--------------|--------------|
| H  | 1.289597000  | -2.994261000 | 0.930800000  |
| H  | 1.050311000  | -2.891428000 | -0.818508000 |
| H  | 3.688296000  | 0.539087000  | -3.852358000 |
| H  | 2.326810000  | -0.445801000 | -3.256009000 |
| H  | 2.358086000  | 1.282255000  | -2.920453000 |
| Se | -0.000038000 | 0.000091000  | -1.251701000 |
| Se | 0.000038000  | 0.000102000  | 1.251703000  |
| Ni | -2.390719000 | -0.000006000 | 0.000094000  |
| N  | -3.720378000 | -0.126221000 | -1.760754000 |
| N  | -2.910098000 | 2.175724000  | -0.143028000 |
| N  | -3.720241000 | 0.126135000  | 1.761054000  |
| C  | -4.433179000 | 1.174239000  | -1.878066000 |
| H  | -5.315533000 | 1.155617000  | -1.236364000 |
| H  | -4.799322000 | 1.325840000  | -2.902941000 |
| C  | -3.509816000 | 2.326296000  | -1.498232000 |
| H  | -2.678870000 | 2.375511000  | -2.206945000 |
| H  | -4.057463000 | 3.277473000  | -1.574296000 |
| C  | -3.885619000 | 2.473816000  | 0.951136000  |
| H  | -4.608668000 | 3.234724000  | 0.625905000  |
| H  | -3.323152000 | 2.917244000  | 1.775541000  |
| C  | -4.643165000 | 1.248923000  | 1.467350000  |
| H  | -5.210588000 | 1.537825000  | 2.364972000  |
| H  | -5.373590000 | 0.901823000  | 0.735961000  |
| C  | -2.981753000 | -0.394391000 | -3.022766000 |
| H  | -2.358195000 | -1.282227000 | -2.920264000 |
| H  | -2.327147000 | 0.445827000  | -3.255847000 |
| C  | -1.774877000 | 3.122789000  | -0.037364000 |
| H  | -2.114098000 | 4.163254000  | -0.143095000 |
| H  | -1.050664000 | 2.891667000  | -0.818408000 |
| H  | -1.289893000 | 2.994547000  | 0.930903000  |
| C  | -2.981530000 | 0.394382000  | 3.022998000  |
| H  | -3.688292000 | 0.539130000  | 3.852354000  |
| H  | -2.358087000 | 1.282291000  | 2.920437000  |

|   |              |              |              |
|---|--------------|--------------|--------------|
| H | -2.326804000 | -0.445761000 | 3.256014000  |
| N | -2.909898000 | -2.175715000 | 0.143266000  |
| C | -4.643178000 | -1.249095000 | -1.466980000 |
| H | -5.373575000 | -0.902059000 | -0.735533000 |
| H | -5.210651000 | -1.538047000 | -2.364556000 |
| C | -3.885476000 | -2.473920000 | -0.950819000 |
| H | -3.323038000 | -2.917301000 | -1.775266000 |
| H | -4.608424000 | -3.234894000 | -0.625521000 |
| C | -3.509487000 | -2.326370000 | 1.498517000  |
| H | -4.057041000 | -3.277598000 | 1.574609000  |
| H | -2.678477000 | -2.375528000 | 2.207157000  |
| C | -4.432918000 | -1.174390000 | 1.878440000  |
| H | -4.798947000 | -1.326019000 | 2.903352000  |
| H | -5.315337000 | -1.155849000 | 1.236827000  |
| H | -3.688575000 | -0.539224000 | -3.852055000 |
| C | -1.774531000 | -3.122617000 | 0.037511000  |
| H | -2.113597000 | -4.163133000 | 0.143224000  |
| H | -1.289601000 | -2.994269000 | -0.930773000 |
| H | -1.050309000 | -2.891417000 | 0.818532000  |

$4^{-1}\mathbf{R}_{(t,t)}$

|    |             |              |              |
|----|-------------|--------------|--------------|
| Ni | 2.516278000 | 0.000004000  | 0.000126000  |
| N  | 3.856570000 | 0.112946000  | -1.776493000 |
| N  | 3.027196000 | -2.176200000 | -0.129130000 |
| N  | 3.856414000 | -0.112925000 | 1.776868000  |
| C  | 4.567483000 | -1.191686000 | -1.864584000 |
| H  | 5.444014000 | -1.165763000 | -1.215761000 |
| H  | 4.943529000 | -1.360645000 | -2.883036000 |
| C  | 3.636948000 | -2.337083000 | -1.479425000 |
| H  | 2.811239000 | -2.389920000 | -2.193877000 |
| H  | 4.182563000 | -3.290352000 | -1.543562000 |
| C  | 3.999626000 | -2.463564000 | 0.971477000  |
| H  | 4.714599000 | -3.237530000 | 0.659092000  |

|   |             |              |              |
|---|-------------|--------------|--------------|
| H | 3.431557000 | -2.887156000 | 1.802463000  |
| C | 4.770770000 | -1.239614000 | 1.470152000  |
| H | 5.351252000 | -1.529305000 | 2.359160000  |
| H | 5.491306000 | -0.897990000 | 0.727118000  |
| C | 3.163592000 | 0.372059000  | -3.066113000 |
| H | 2.541067000 | 1.263682000  | -2.995281000 |
| H | 3.900935000 | 0.507122000  | -3.870182000 |
| C | 1.898458000 | -3.134675000 | -0.019748000 |
| H | 2.252388000 | -4.172169000 | -0.101421000 |
| H | 1.178990000 | -2.931577000 | -0.814140000 |
| H | 1.398994000 | -2.993614000 | 0.939685000  |
| C | 3.163325000 | -0.372009000 | 3.066434000  |
| N | 3.027171000 | 2.176204000  | 0.129426000  |
| C | 4.770899000 | 1.239629000  | -1.469682000 |
| H | 5.491358000 | 0.898010000  | -0.726570000 |
| H | 5.351471000 | 1.529320000  | -2.358632000 |
| C | 3.999695000 | 2.463575000  | -0.971095000 |
| H | 3.431697000 | 2.887151000  | -1.802139000 |
| H | 4.714630000 | 3.237552000  | -0.658651000 |
| C | 3.636808000 | 2.337096000  | 1.479771000  |
| H | 4.182412000 | 3.290369000  | 1.543949000  |
| H | 2.811043000 | 2.389928000  | 2.194159000  |
| C | 4.567322000 | 1.191706000  | 1.864998000  |
| H | 4.943295000 | 1.360673000  | 2.883476000  |
| H | 5.443899000 | 1.165782000  | 1.216235000  |
| H | 2.516579000 | -0.468740000 | -3.317853000 |
| C | 1.898427000 | 3.134662000  | 0.019943000  |
| H | 2.252334000 | 4.172162000  | 0.101642000  |
| H | 1.399051000 | 2.993589000  | -0.939534000 |
| H | 1.178891000 | 2.931557000  | 0.814273000  |
| H | 3.900599000 | -0.507068000 | 3.870568000  |
| H | 2.516306000 | 0.468807000  | 3.318107000  |
| H | 2.540792000 | -1.263624000 | 2.995568000  |



|    |              |              |              |
|----|--------------|--------------|--------------|
| Te | -0.000057000 | -0.000012000 | 1.411301000  |
| Te | 0.000057000  | -0.000031000 | -1.411309000 |
| Ni | -2.516278000 | 0.000004000  | -0.000124000 |
| N  | -3.856567000 | 0.112965000  | 1.776495000  |
| N  | -3.027197000 | -2.176198000 | 0.129155000  |
| N  | -3.856417000 | -0.112944000 | -1.776864000 |
| C  | -4.567481000 | -1.191666000 | 1.864601000  |
| H  | -5.444013000 | -1.165749000 | 1.215779000  |
| H  | -4.943526000 | -1.360614000 | 2.883056000  |
| C  | -3.636947000 | -2.337067000 | 1.479453000  |
| H  | -2.811238000 | -2.389899000 | 2.193905000  |
| H  | -4.182563000 | -3.290335000 | 1.543600000  |
| C  | -3.999628000 | -2.463574000 | -0.971447000 |
| H  | -4.714600000 | -3.237537000 | -0.659053000 |
| H  | -3.431559000 | -2.887175000 | -1.802429000 |
| C  | -4.770772000 | -1.239630000 | -1.470134000 |
| H  | -5.351256000 | -1.529330000 | -2.359139000 |
| H  | -5.491308000 | -0.897997000 | -0.727103000 |
| C  | -3.163587000 | 0.372091000  | 3.066111000  |
| H  | -2.541060000 | 1.263712000  | 2.995269000  |
| H  | -2.516575000 | -0.468707000 | 3.317859000  |
| C  | -1.898458000 | -3.134673000 | 0.019782000  |
| H  | -2.252387000 | -4.172167000 | 0.101468000  |
| H  | -1.178989000 | -2.931567000 | 0.814171000  |
| H  | -1.398996000 | -2.993623000 | -0.939653000 |
| C  | -3.163330000 | -0.372042000 | -3.066428000 |
| H  | -3.900604000 | -0.507111000 | -3.870559000 |
| H  | -2.540796000 | -1.263656000 | -2.995553000 |
| H  | -2.516312000 | 0.468771000  | -3.318111000 |
| N  | -3.027171000 | 2.176203000  | -0.129447000 |
| C  | -4.770896000 | 1.239646000  | 1.469675000  |
| H  | -5.491357000 | 0.898018000  | 0.726568000  |
| H  | -5.351466000 | 1.529346000  | 2.358623000  |

|   |              |             |              |
|---|--------------|-------------|--------------|
| C | -3.999693000 | 2.463585000 | 0.971073000  |
| H | -3.431693000 | 2.887171000 | 1.802110000  |
| H | -4.714628000 | 3.237559000 | 0.658622000  |
| C | -3.636811000 | 2.337080000 | -1.479793000 |
| H | -4.182415000 | 3.290352000 | -1.543980000 |
| H | -2.811047000 | 2.389906000 | -2.194183000 |
| C | -4.567324000 | 1.191685000 | -1.865007000 |
| H | -4.943299000 | 1.360642000 | -2.883486000 |
| H | -5.443901000 | 1.165769000 | -1.216243000 |
| H | -3.900928000 | 0.507163000 | 3.870181000  |
| C | -1.898426000 | 3.134661000 | -0.019977000 |
| H | -2.252333000 | 4.172161000 | -0.101690000 |
| H | -1.399050000 | 2.993600000 | 0.939501000  |
| H | -1.178891000 | 2.931545000 | -0.814305000 |

$\mathbf{1}^{-5}\text{TS1}_{(t,t)}$

|    |              |              |              |
|----|--------------|--------------|--------------|
| Ni | 2.183090000  | -1.573734000 | -0.093622000 |
| N  | 3.889561000  | -2.273870000 | -1.196406000 |
| N  | 1.065188000  | -2.844464000 | -1.550481000 |
| N  | 1.675202000  | -3.201052000 | 1.256774000  |
| C  | 3.486755000  | -3.522175000 | -1.886326000 |
| H  | 3.522307000  | -4.335621000 | -1.159361000 |
| H  | 4.197941000  | -3.780114000 | -2.685457000 |
| C  | 2.085802000  | -3.386037000 | -2.493769000 |
| H  | 2.132214000  | -2.704922000 | -3.346821000 |
| H  | 1.769248000  | -4.361023000 | -2.891367000 |
| C  | 0.392085000  | -3.903594000 | -0.747899000 |
| H  | 0.155671000  | -4.775560000 | -1.376499000 |
| H  | -0.555872000 | -3.484896000 | -0.401662000 |
| C  | 1.217308000  | -4.362681000 | 0.456287000  |
| H  | 0.610436000  | -5.046768000 | 1.067811000  |
| H  | 2.096583000  | -4.926150000 | 0.138245000  |
| C  | 4.219909000  | -1.217225000 | -2.185615000 |

|    |              |              |              |
|----|--------------|--------------|--------------|
| H  | 4.521122000  | -0.307707000 | -1.666811000 |
| H  | 5.037928000  | -1.544596000 | -2.843292000 |
| C  | 0.040751000  | -2.088097000 | -2.310532000 |
| H  | -0.431588000 | -2.725582000 | -3.074005000 |
| H  | 0.511176000  | -1.228313000 | -2.789393000 |
| H  | -0.715646000 | -1.728942000 | -1.612068000 |
| C  | 0.562731000  | -2.686607000 | 2.095617000  |
| N  | 3.750232000  | -1.212099000 | 1.519262000  |
| C  | 5.027202000  | -2.467717000 | -0.261661000 |
| H  | 4.934762000  | -3.456313000 | 0.192293000  |
| H  | 5.984695000  | -2.459984000 | -0.802531000 |
| C  | 5.049812000  | -1.374232000 | 0.810462000  |
| H  | 5.284670000  | -0.411581000 | 0.349398000  |
| H  | 5.859529000  | -1.588127000 | 1.524149000  |
| C  | 3.544134000  | -2.238051000 | 2.581432000  |
| H  | 4.498458000  | -2.502003000 | 3.059144000  |
| H  | 2.928529000  | -1.780553000 | 3.359356000  |
| C  | 2.856443000  | -3.516443000 | 2.090089000  |
| H  | 2.575815000  | -4.125802000 | 2.962957000  |
| H  | 3.537460000  | -4.123551000 | 1.491069000  |
| H  | 3.344858000  | -0.976825000 | -2.790105000 |
| C  | 3.699448000  | 0.137573000  | 2.132925000  |
| H  | 4.485629000  | 0.265256000  | 2.891100000  |
| H  | 3.823535000  | 0.894119000  | 1.359874000  |
| H  | 2.725057000  | 0.283396000  | 2.604650000  |
| H  | 0.281592000  | -3.429342000 | 2.857155000  |
| H  | 0.871035000  | -1.766176000 | 2.594651000  |
| H  | -0.307964000 | -2.459892000 | 1.476567000  |
| Ni | -3.482746000 | -0.444508000 | 0.274403000  |
| N  | -3.538099000 | 1.073848000  | -1.239733000 |
| N  | -2.489616000 | 1.147569000  | 1.455714000  |
| N  | -5.121547000 | -0.052433000 | 1.621836000  |
| C  | -3.377625000 | 2.386184000  | -0.567774000 |

|   |              |              |              |
|---|--------------|--------------|--------------|
| H | -4.347494000 | 2.678614000  | -0.159461000 |
| H | -3.080406000 | 3.165593000  | -1.282908000 |
| C | -2.310999000 | 2.305078000  | 0.528059000  |
| H | -1.327692000 | 2.204314000  | 0.066563000  |
| H | -2.294250000 | 3.249847000  | 1.087466000  |
| C | -3.408405000 | 1.456604000  | 2.589325000  |
| H | -3.244963000 | 2.481725000  | 2.950884000  |
| H | -3.141659000 | 0.790326000  | 3.413418000  |
| C | -4.891005000 | 1.270902000  | 2.248988000  |
| H | -5.487331000 | 1.385554000  | 3.166159000  |
| H | -5.231487000 | 2.041128000  | 1.554180000  |
| C | -2.385066000 | 0.809335000  | -2.140094000 |
| H | -2.507358000 | -0.162249000 | -2.620336000 |
| H | -1.451819000 | 0.783897000  | -1.575496000 |
| C | -1.162536000 | 0.743496000  | 1.990411000  |
| H | -0.725283000 | 1.547481000  | 2.601430000  |
| H | -0.480868000 | 0.506718000  | 1.167866000  |
| H | -1.289659000 | -0.144588000 | 2.613511000  |
| C | -5.083553000 | -1.127413000 | 2.646536000  |
| H | -5.899757000 | -1.003518000 | 3.372263000  |
| H | -4.130175000 | -1.109943000 | 3.175732000  |
| H | -5.174128000 | -2.105008000 | 2.171817000  |
| N | -5.091295000 | -1.360384000 | -0.954732000 |
| C | -4.818085000 | 0.941358000  | -1.975441000 |
| H | -5.597245000 | 1.445810000  | -1.400059000 |
| H | -4.770726000 | 1.445933000  | -2.951718000 |
| C | -5.170180000 | -0.534009000 | -2.195937000 |
| H | -4.473433000 | -0.968146000 | -2.916654000 |
| H | -6.170186000 | -0.606539000 | -2.646170000 |
| C | -6.343864000 | -1.298054000 | -0.143087000 |
| H | -7.226962000 | -1.251910000 | -0.795255000 |
| H | -6.417662000 | -2.236085000 | 0.411753000  |
| C | -6.379503000 | -0.123343000 | 0.842270000  |

|   |              |              |              |
|---|--------------|--------------|--------------|
| H | -7.252563000 | -0.238676000 | 1.501831000  |
| H | -6.505804000 | 0.825228000  | 0.316451000  |
| H | -2.317643000 | 1.586455000  | -2.913784000 |
| C | -4.803510000 | -2.772591000 | -1.317737000 |
| H | -5.599350000 | -3.199363000 | -1.943858000 |
| H | -3.855914000 | -2.818101000 | -1.857259000 |
| H | -4.704947000 | -3.367817000 | -0.407975000 |
| C | 4.862192000  | 2.446497000  | -0.859335000 |
| C | 5.984497000  | 2.872798000  | -0.148231000 |
| C | 5.820797000  | 3.626739000  | 1.017193000  |
| C | 4.536928000  | 3.963270000  | 1.452755000  |
| H | 4.989449000  | 1.906619000  | -1.795189000 |
| H | 6.981099000  | 2.643561000  | -0.514690000 |
| H | 6.688784000  | 3.974898000  | 1.569168000  |
| H | 4.413346000  | 4.577973000  | 2.341128000  |
| C | 3.408120000  | 3.537779000  | 0.747414000  |
| C | 3.566874000  | 2.758574000  | -0.416195000 |
| C | 2.347198000  | 2.312905000  | -1.158610000 |
| C | 2.004619000  | 3.904453000  | 1.185934000  |
| H | 1.908068000  | 1.299800000  | -0.680414000 |
| H | 2.024771000  | 4.785332000  | 1.836464000  |
| C | 1.247789000  | 3.329669000  | -1.141654000 |
| C | 1.085520000  | 4.135848000  | 0.003459000  |
| C | 0.111478000  | 5.137981000  | 0.008648000  |
| C | -0.706210000 | 5.345527000  | -1.106015000 |
| C | -0.552537000 | 4.542101000  | -2.240321000 |
| C | 0.417518000  | 3.538655000  | -2.252861000 |
| H | 0.011806000  | 5.782833000  | 0.878839000  |
| H | -1.435522000 | 6.150868000  | -1.100562000 |
| H | -1.158715000 | 4.723217000  | -3.124086000 |
| H | 0.563933000  | 2.936423000  | -3.146745000 |
| H | 2.583418000  | 1.993301000  | -2.179143000 |
| H | 1.595975000  | 3.082905000  | 1.800588000  |

|   |              |              |              |
|---|--------------|--------------|--------------|
| O | 1.270801000  | 0.008989000  | -0.441121000 |
| O | -2.248654000 | -1.751016000 | 0.291803000  |

**Imaginary frequency  $i640.9$**

$2^{-1}TS1_{(t,t)}$

|    |              |              |              |
|----|--------------|--------------|--------------|
| Ni | 1.339928000  | -1.969502000 | -0.062390000 |
| N  | 3.436542000  | -2.211162000 | -0.823083000 |
| N  | 0.962859000  | -3.278904000 | -1.871529000 |
| N  | 0.982782000  | -3.957066000 | 0.996355000  |
| C  | 3.467962000  | -3.500492000 | -1.546306000 |
| H  | 3.474694000  | -4.304980000 | -0.811332000 |
| H  | 4.394734000  | -3.603720000 | -2.132061000 |
| C  | 2.272733000  | -3.623974000 | -2.497505000 |
| H  | 2.421171000  | -2.948103000 | -3.342037000 |
| H  | 2.248150000  | -4.640157000 | -2.916318000 |
| C  | 0.274419000  | -4.474238000 | -1.319965000 |
| H  | 0.227596000  | -5.275891000 | -2.073620000 |
| H  | -0.752241000 | -4.172216000 | -1.097133000 |
| C  | 0.928921000  | -5.012268000 | -0.048144000 |
| H  | 0.360387000  | -5.883431000 | 0.306910000  |
| H  | 1.938191000  | -5.372410000 | -0.252696000 |
| C  | 3.784583000  | -1.115778000 | -1.756740000 |
| H  | 3.874270000  | -0.184155000 | -1.204090000 |
| H  | 4.742732000  | -1.330480000 | -2.253740000 |
| C  | 0.084186000  | -2.641581000 | -2.880040000 |
| H  | -0.128783000 | -3.325300000 | -3.715227000 |
| H  | 0.563907000  | -1.737554000 | -3.258611000 |
| H  | -0.842841000 | -2.345014000 | -2.387732000 |
| C  | -0.278817000 | -3.987737000 | 1.774429000  |
| N  | 2.424294000  | -1.568062000 | 1.841639000  |
| C  | 4.353155000  | -2.171714000 | 0.345143000  |
| H  | 4.477437000  | -3.181598000 | 0.739687000  |
| H  | 5.354737000  | -1.833101000 | 0.045345000  |

|    |              |              |              |
|----|--------------|--------------|--------------|
| C  | 3.808895000  | -1.228713000 | 1.417089000  |
| H  | 3.783369000  | -0.209157000 | 1.024112000  |
| H  | 4.488679000  | -1.226047000 | 2.282927000  |
| C  | 2.376824000  | -2.795606000 | 2.692100000  |
| H  | 3.301726000  | -2.894014000 | 3.277943000  |
| H  | 1.568998000  | -2.661182000 | 3.414863000  |
| C  | 2.134168000  | -4.093949000 | 1.913581000  |
| H  | 1.975449000  | -4.909039000 | 2.637187000  |
| H  | 3.009425000  | -4.368391000 | 1.324874000  |
| H  | 3.001621000  | -0.983070000 | -2.502211000 |
| C  | 1.858798000  | -0.425779000 | 2.596630000  |
| H  | 2.414993000  | -0.244756000 | 3.528269000  |
| H  | 1.896039000  | 0.464913000  | 1.968549000  |
| H  | 0.812011000  | -0.634217000 | 2.825249000  |
| H  | -0.334979000 | -4.913035000 | 2.367384000  |
| H  | -0.345606000 | -3.122841000 | 2.433121000  |
| H  | -1.130159000 | -3.937396000 | 1.096970000  |
| Ni | -2.978941000 | 0.087443000  | 0.265952000  |
| N  | -3.506908000 | 1.348871000  | -1.369026000 |
| N  | -2.376748000 | 1.991798000  | 1.244175000  |
| N  | -4.608145000 | 0.234322000  | 1.686351000  |
| C  | -3.438772000 | 2.759136000  | -0.901713000 |
| H  | -4.399793000 | 3.024680000  | -0.455966000 |
| H  | -3.285360000 | 3.441494000  | -1.749241000 |
| C  | -2.302376000 | 2.943512000  | 0.101336000  |
| H  | -1.344622000 | 2.769875000  | -0.394182000 |
| H  | -2.296661000 | 3.982676000  | 0.460931000  |
| C  | -3.424982000 | 2.354421000  | 2.244208000  |
| H  | -3.572633000 | 3.442973000  | 2.275626000  |
| H  | -3.049969000 | 2.067761000  | 3.229169000  |
| C  | -4.775702000 | 1.672222000  | 2.004324000  |
| H  | -5.408924000 | 1.810007000  | 2.893990000  |
| H  | -5.302549000 | 2.134588000  | 1.167613000  |

|   |              |              |              |
|---|--------------|--------------|--------------|
| C | -2.507611000 | 1.117535000  | -2.446336000 |
| H | -2.489899000 | 0.061717000  | -2.716422000 |
| H | -1.506790000 | 1.369982000  | -2.094306000 |
| C | -1.055146000 | 1.952461000  | 1.915362000  |
| H | -0.802006000 | 2.935697000  | 2.339197000  |
| H | -0.300114000 | 1.646522000  | 1.190408000  |
| H | -1.079978000 | 1.211344000  | 2.716552000  |
| C | -4.184512000 | -0.528707000 | 2.888619000  |
| H | -4.926798000 | -0.431800000 | 3.693860000  |
| H | -3.218512000 | -0.168438000 | 3.244512000  |
| H | -4.067209000 | -1.583529000 | 2.635615000  |
| N | -4.492288000 | -1.318095000 | -0.771758000 |
| C | -4.865814000 | 0.967281000  | -1.821489000 |
| H | -5.583693000 | 1.375573000  | -1.107616000 |
| H | -5.096705000 | 1.421795000  | -2.796796000 |
| C | -5.016438000 | -0.553827000 | -1.942416000 |
| H | -4.471107000 | -0.895052000 | -2.824699000 |
| H | -6.074280000 | -0.793521000 | -2.122645000 |
| C | -5.529716000 | -1.577530000 | 0.259257000  |
| H | -6.458335000 | -1.948189000 | -0.201146000 |
| H | -5.152962000 | -2.381098000 | 0.898079000  |
| C | -5.847059000 | -0.354124000 | 1.115620000  |
| H | -6.546434000 | -0.641022000 | 1.913944000  |
| H | -6.351632000 | 0.410729000  | 0.522006000  |
| H | -2.758504000 | 1.718665000  | -3.332162000 |
| C | -3.958946000 | -2.618634000 | -1.238746000 |
| H | -4.746245000 | -3.232603000 | -1.700571000 |
| H | -3.162354000 | -2.445098000 | -1.963038000 |
| H | -3.529706000 | -3.157048000 | -0.392140000 |
| C | 5.186429000  | 2.056904000  | -0.704415000 |
| C | 6.266767000  | 2.114504000  | 0.167075000  |
| C | 6.138981000  | 2.791505000  | 1.386885000  |
| C | 4.935957000  | 3.421505000  | 1.714655000  |



|   |              |              |              |
|---|--------------|--------------|--------------|
| H | 5.294820000  | 1.574378000  | -1.672337000 |
| H | 7.214136000  | 1.660324000  | -0.107907000 |
| H | 6.983385000  | 2.852592000  | 2.066916000  |
| H | 4.856597000  | 3.975085000  | 2.647079000  |
| C | 3.842219000  | 3.375728000  | 0.849144000  |
| C | 3.956006000  | 2.670423000  | -0.375773000 |
| C | 2.833608000  | 2.646426000  | -1.293925000 |
| C | 2.544397000  | 4.072333000  | 1.192904000  |
| H | 1.937793000  | 1.317699000  | -0.772060000 |
| H | 2.748759000  | 4.967840000  | 1.791300000  |
| C | 1.821104000  | 3.680588000  | -1.202263000 |
| C | 1.695688000  | 4.430461000  | -0.006953000 |
| C | 0.780909000  | 5.484233000  | 0.042782000  |
| C | -0.013762000 | 5.796707000  | -1.063254000 |
| C | 0.090905000  | 5.042072000  | -2.239848000 |
| C | 0.996407000  | 3.990195000  | -2.305326000 |
| H | 0.705897000  | 6.084589000  | 0.946388000  |
| H | -0.696460000 | 6.640467000  | -1.016444000 |
| H | -0.510722000 | 5.297440000  | -3.107462000 |
| H | 1.102160000  | 3.414633000  | -3.221334000 |
| H | 3.015493000  | 2.231649000  | -2.282979000 |
| H | 1.953398000  | 3.412953000  | 1.853236000  |
| S | 0.854591000  | 0.313610000  | -0.867022000 |
| S | -1.085075000 | -1.226690000 | 0.229956000  |

**Imaginary frequency  $i855.7$**

**$3^{-5}TS1_{(t,t)}$**

|    |             |              |              |
|----|-------------|--------------|--------------|
| Ni | 2.639291000 | -1.718983000 | -0.099216000 |
| N  | 4.498540000 | -2.362275000 | -1.005094000 |
| N  | 1.797231000 | -3.134138000 | -1.633414000 |
| N  | 2.087762000 | -3.264507000 | 1.276085000  |
| C  | 4.272469000 | -3.712154000 | -1.569065000 |
| H  | 4.283567000 | -4.421840000 | -0.739992000 |

|   |             |              |              |
|---|-------------|--------------|--------------|
| H | 5.090615000 | -4.000885000 | -2.246700000 |
| C | 2.947193000 | -3.780789000 | -2.335338000 |
| H | 3.066285000 | -3.276606000 | -3.297059000 |
| H | 2.719733000 | -4.831079000 | -2.565845000 |
| C | 1.012479000 | -4.091047000 | -0.805876000 |
| H | 0.786323000 | -5.003776000 | -1.378432000 |
| H | 0.060057000 | -3.604497000 | -0.578569000 |
| C | 1.718175000 | -4.475488000 | 0.494066000  |
| H | 1.060703000 | -5.129712000 | 1.083808000  |
| H | 2.625358000 | -5.048634000 | 0.290335000  |
| C | 4.782353000 | -1.378895000 | -2.079977000 |
| H | 4.984682000 | -0.402085000 | -1.639550000 |
| H | 5.652857000 | -1.691017000 | -2.675314000 |
| C | 0.897133000 | -2.531046000 | -2.651854000 |
| H | 0.549401000 | -3.294728000 | -3.363061000 |
| H | 1.434960000 | -1.749751000 | -3.191977000 |
| H | 0.040672000 | -2.070976000 | -2.159577000 |
| C | 0.920223000 | -2.790640000 | 2.065518000  |
| N | 4.030795000 | -1.141571000 | 1.585710000  |
| C | 5.582319000 | -2.343711000 | 0.010861000  |
| H | 5.578936000 | -3.300649000 | 0.536449000  |
| H | 6.567331000 | -2.256136000 | -0.469985000 |
| C | 5.393506000 | -1.185334000 | 0.989505000  |
| H | 5.549316000 | -0.233959000 | 0.474446000  |
| H | 6.161046000 | -1.248222000 | 1.775803000  |
| C | 3.839894000 | -2.165046000 | 2.656625000  |
| H | 4.787919000 | -2.362469000 | 3.176549000  |
| H | 3.164552000 | -1.736315000 | 3.399862000  |
| C | 3.255519000 | -3.491094000 | 2.158524000  |
| H | 2.978961000 | -4.105416000 | 3.028975000  |
| H | 3.997256000 | -4.059330000 | 1.595091000  |
| H | 3.916758000 | -1.273787000 | -2.736221000 |
| C | 3.801549000 | 0.207082000  | 2.161372000  |

|    |              |              |              |
|----|--------------|--------------|--------------|
| H  | 4.492171000  | 0.403856000  | 2.994151000  |
| H  | 3.949842000  | 0.961539000  | 1.389559000  |
| H  | 2.770515000  | 0.279247000  | 2.510645000  |
| H  | 0.668379000  | -3.525792000 | 2.843963000  |
| H  | 1.143994000  | -1.829285000 | 2.528153000  |
| H  | 0.060106000  | -2.636265000 | 1.412907000  |
| Se | 1.106454000  | 0.227597000  | -0.339794000 |
| Se | -1.914261000 | -1.256014000 | -0.159472000 |
| Ni | -4.017432000 | -0.125747000 | 0.082770000  |
| N  | -5.414878000 | 0.380751000  | -1.490989000 |
| N  | -3.548626000 | 2.052114000  | -0.007265000 |
| N  | -4.964994000 | 0.436969000  | 1.947843000  |
| C  | -5.591978000 | 1.853327000  | -1.483397000 |
| H  | -6.331190000 | 2.104268000  | -0.720055000 |
| H  | -5.997662000 | 2.207090000  | -2.442950000 |
| C  | -4.265483000 | 2.563577000  | -1.209036000 |
| H  | -3.596888000 | 2.421958000  | -2.061336000 |
| H  | -4.444017000 | 3.645891000  | -1.124747000 |
| C  | -4.050424000 | 2.646827000  | 1.264666000  |
| H  | -4.330660000 | 3.700179000  | 1.118962000  |
| H  | -3.216935000 | 2.643030000  | 1.970611000  |
| C  | -5.233099000 | 1.893435000  | 1.881174000  |
| H  | -5.434288000 | 2.304777000  | 2.882085000  |
| H  | -6.140674000 | 2.042930000  | 1.293241000  |
| C  | -4.807936000 | -0.064529000 | -2.771611000 |
| H  | -4.589367000 | -1.131820000 | -2.731330000 |
| H  | -3.860849000 | 0.449356000  | -2.936901000 |
| C  | -2.100878000 | 2.360737000  | -0.147398000 |
| H  | -1.929025000 | 3.444252000  | -0.205837000 |
| H  | -1.710991000 | 1.881193000  | -1.045320000 |
| H  | -1.554353000 | 1.948416000  | 0.701182000  |
| C  | -4.010416000 | 0.131963000  | 3.043281000  |
| H  | -4.432229000 | 0.425176000  | 4.015981000  |

|   |              |              |              |
|---|--------------|--------------|--------------|
| H | -3.070815000 | 0.660110000  | 2.880193000  |
| H | -3.781450000 | -0.933808000 | 3.053473000  |
| N | -5.412054000 | -1.930301000 | 0.280991000  |
| C | -6.683417000 | -0.341464000 | -1.237895000 |
| H | -7.237163000 | 0.205640000  | -0.472590000 |
| H | -7.318287000 | -0.352829000 | -2.137108000 |
| C | -6.427275000 | -1.787425000 | -0.802409000 |
| H | -6.063518000 | -2.356786000 | -1.660730000 |
| H | -7.381184000 | -2.248041000 | -0.506136000 |
| C | -5.997010000 | -1.806483000 | 1.645021000  |
| H | -6.953952000 | -2.345778000 | 1.709124000  |
| H | -5.310667000 | -2.305919000 | 2.333153000  |
| C | -6.205000000 | -0.362119000 | 2.102856000  |
| H | -6.543339000 | -0.365990000 | 3.149838000  |
| H | -6.994092000 | 0.117730000  | 1.521816000  |
| H | -5.485962000 | 0.140142000  | -3.613081000 |
| C | -4.773902000 | -3.265624000 | 0.160332000  |
| H | -5.510560000 | -4.073595000 | 0.280606000  |
| H | -4.299407000 | -3.355295000 | -0.818472000 |
| H | -3.999177000 | -3.368107000 | 0.922107000  |
| C | 5.289621000  | 2.424198000  | -0.931911000 |
| C | 6.494488000  | 2.568642000  | -0.252755000 |
| C | 6.530885000  | 3.283172000  | 0.952347000  |
| C | 5.363170000  | 3.859323000  | 1.459122000  |
| H | 5.260531000  | 1.915931000  | -1.893184000 |
| H | 7.409617000  | 2.157361000  | -0.669555000 |
| H | 7.470867000  | 3.412989000  | 1.480393000  |
| H | 5.404854000  | 4.435207000  | 2.380414000  |
| C | 4.146738000  | 3.728204000  | 0.786947000  |
| C | 4.100110000  | 2.993234000  | -0.424459000 |
| C | 2.849275000  | 2.894695000  | -1.149895000 |
| C | 2.874335000  | 4.342589000  | 1.327493000  |
| H | 2.096322000  | 1.503273000  | -0.548938000 |

|   |              |             |              |
|---|--------------|-------------|--------------|
| H | 3.106720000  | 5.238792000 | 1.913815000  |
| C | 1.827229000  | 3.896667000 | -0.930393000 |
| C | 1.848817000  | 4.662380000 | 0.262560000  |
| C | 0.916076000  | 5.684774000 | 0.433171000  |
| C | -0.035281000 | 5.958224000 | -0.554033000 |
| C | -0.067600000 | 5.196370000 | -1.729563000 |
| C | 0.850586000  | 4.169443000 | -1.912040000 |
| H | 0.943883000  | 6.289417000 | 1.336403000  |
| H | -0.735027000 | 6.777549000 | -0.415686000 |
| H | -0.791568000 | 5.423477000 | -2.506996000 |
| H | 0.848314000  | 3.588756000 | -2.831044000 |
| H | 2.891514000  | 2.451589000 | -2.143269000 |
| H | 2.420673000  | 3.633564000 | 2.042694000  |

**Imaginary frequency  $i606.6$**

**$4^{-5}\text{TS1}_{(t,t)}$**

|    |             |              |              |
|----|-------------|--------------|--------------|
| Ni | 3.026668000 | -1.438966000 | 0.185940000  |
| N  | 5.114611000 | -0.816822000 | 0.351606000  |
| N  | 3.452268000 | -1.368166000 | -2.021713000 |
| N  | 2.976336000 | -3.617683000 | -0.187514000 |
| C  | 5.740558000 | -1.134085000 | -0.954808000 |
| H  | 5.990364000 | -2.196487000 | -0.965650000 |
| H  | 6.689470000 | -0.589557000 | -1.080850000 |
| C  | 4.819167000 | -0.785979000 | -2.125774000 |
| H  | 4.702101000 | 0.299751000  | -2.172391000 |
| H  | 5.303710000 | -1.093512000 | -3.065456000 |
| C  | 3.370962000 | -2.776298000 | -2.501698000 |
| H  | 4.011411000 | -2.925033000 | -3.384474000 |
| H  | 2.342848000 | -2.941069000 | -2.833612000 |
| C  | 3.724296000 | -3.828418000 | -1.447760000 |
| H  | 3.521620000 | -4.826212000 | -1.869129000 |
| H  | 4.791103000 | -3.800501000 | -1.218792000 |
| C  | 5.228040000 | 0.632677000  | 0.639536000  |

|    |              |              |              |
|----|--------------|--------------|--------------|
| H  | 4.713616000  | 0.870659000  | 1.571983000  |
| H  | 6.283798000  | 0.933132000  | 0.728402000  |
| C  | 2.528237000  | -0.546579000 | -2.839711000 |
| H  | 2.804602000  | -0.569147000 | -3.905078000 |
| H  | 2.557265000  | 0.484959000  | -2.487759000 |
| H  | 1.507259000  | -0.917585000 | -2.727643000 |
| C  | 1.580060000  | -4.087797000 | -0.324176000 |
| N  | 3.375688000  | -2.138407000 | 2.338678000  |
| C  | 5.701756000  | -1.612185000 | 1.454141000  |
| H  | 5.930546000  | -2.608722000 | 1.072775000  |
| H  | 6.658131000  | -1.180297000 | 1.789704000  |
| C  | 4.762872000  | -1.696433000 | 2.659823000  |
| H  | 4.685158000  | -0.705329000 | 3.114116000  |
| H  | 5.214457000  | -2.353037000 | 3.419326000  |
| C  | 3.227255000  | -3.619771000 | 2.294952000  |
| H  | 3.794786000  | -4.092309000 | 3.111761000  |
| H  | 2.172879000  | -3.838881000 | 2.483408000  |
| C  | 3.636264000  | -4.264948000 | 0.968582000  |
| H  | 3.395932000  | -5.339206000 | 1.016162000  |
| H  | 4.716068000  | -4.197074000 | 0.827537000  |
| H  | 4.759853000  | 1.215498000  | -0.154060000 |
| C  | 2.470753000  | -1.616657000 | 3.391202000  |
| H  | 2.730514000  | -2.014828000 | 4.383778000  |
| H  | 2.529634000  | -0.526980000 | 3.420794000  |
| H  | 1.440031000  | -1.893824000 | 3.158730000  |
| H  | 1.545097000  | -5.163472000 | -0.561110000 |
| H  | 1.034768000  | -3.913417000 | 0.605079000  |
| H  | 1.066683000  | -3.528775000 | -1.107981000 |
| Te | 0.978051000  | 0.157756000  | 0.595597000  |
| Te | -1.336390000 | -0.713542000 | -1.044066000 |
| Ni | -3.763359000 | -0.493099000 | -0.041090000 |
| N  | -5.231366000 | 0.947345000  | -0.664970000 |
| N  | -3.712514000 | 0.787186000  | 1.812938000  |

|   |              |              |              |
|---|--------------|--------------|--------------|
| N | -4.787160000 | -1.865438000 | 1.275533000  |
| C | -5.698098000 | 1.688961000  | 0.534201000  |
| H | -6.467220000 | 1.090736000  | 1.025727000  |
| H | -6.175388000 | 2.636939000  | 0.245671000  |
| C | -4.541219000 | 1.983334000  | 1.487502000  |
| H | -3.873345000 | 2.719609000  | 1.034516000  |
| H | -4.937497000 | 2.441024000  | 2.405983000  |
| C | -4.298463000 | -0.046900000 | 2.903147000  |
| H | -4.767633000 | 0.588473000  | 3.668171000  |
| H | -3.468275000 | -0.559289000 | 3.394657000  |
| C | -5.314461000 | -1.085435000 | 2.422646000  |
| H | -5.570002000 | -1.747539000 | 3.263515000  |
| H | -6.244508000 | -0.608558000 | 2.108619000  |
| C | -4.564391000 | 1.874812000  | -1.616982000 |
| H | -4.156313000 | 1.319218000  | -2.461495000 |
| H | -3.729866000 | 2.375304000  | -1.126029000 |
| C | -2.371598000 | 1.256422000  | 2.248254000  |
| H | -2.445143000 | 1.867676000  | 3.159465000  |
| H | -1.912985000 | 1.849177000  | 1.456485000  |
| H | -1.728455000 | 0.397896000  | 2.441577000  |
| C | -3.784522000 | -2.859009000 | 1.739029000  |
| H | -4.247880000 | -3.584429000 | 2.423312000  |
| H | -2.964504000 | -2.353912000 | 2.250529000  |
| H | -3.356760000 | -3.386215000 | 0.885910000  |
| N | -4.800762000 | -1.764453000 | -1.656678000 |
| C | -6.343065000 | 0.227223000  | -1.333333000 |
| H | -6.986621000 | -0.193029000 | -0.558672000 |
| H | -6.965685000 | 0.922994000  | -1.915246000 |
| C | -5.822295000 | -0.863909000 | -2.268996000 |
| H | -5.355266000 | -0.395023000 | -3.137751000 |
| H | -6.673153000 | -1.447079000 | -2.650599000 |
| C | -5.407127000 | -2.898844000 | -0.902980000 |
| H | -6.256701000 | -3.322706000 | -1.458867000 |

|   |              |              |              |
|---|--------------|--------------|--------------|
| H | -4.649424000 | -3.684212000 | -0.846190000 |
| C | -5.865813000 | -2.539503000 | 0.510545000  |
| H | -6.193203000 | -3.457392000 | 1.020870000  |
| H | -6.729791000 | -1.873919000 | 0.481734000  |
| H | -5.278269000 | 2.625956000  | -1.984875000 |
| C | -3.973660000 | -2.333186000 | -2.754640000 |
| H | -4.590647000 | -2.921282000 | -3.449222000 |
| H | -3.490880000 | -1.524737000 | -3.306630000 |
| H | -3.195240000 | -2.973353000 | -2.336432000 |
| C | 3.547006000  | 3.254634000  | -2.067213000 |
| C | 4.883459000  | 3.615687000  | -1.938914000 |
| C | 5.318740000  | 4.274746000  | -0.781047000 |
| C | 4.407309000  | 4.571784000  | 0.236416000  |
| H | 3.194493000  | 2.786995000  | -2.983649000 |
| H | 5.581995000  | 3.414861000  | -2.746489000 |
| H | 6.357302000  | 4.576482000  | -0.682559000 |
| H | 4.746659000  | 5.103217000  | 1.122451000  |
| C | 3.061599000  | 4.220242000  | 0.122709000  |
| C | 2.614391000  | 3.550696000  | -1.046059000 |
| C | 1.212065000  | 3.235386000  | -1.189858000 |
| C | 2.072096000  | 4.528843000  | 1.227167000  |
| H | 1.152604000  | 1.637304000  | -0.381671000 |
| H | 2.372494000  | 5.439726000  | 1.758072000  |
| C | 0.231745000  | 3.962848000  | -0.416332000 |
| C | 0.637894000  | 4.648748000  | 0.757360000  |
| C | -0.295126000 | 5.407978000  | 1.464341000  |
| C | -1.620301000 | 5.505151000  | 1.031831000  |
| C | -2.027228000 | 4.829189000  | -0.126632000 |
| C | -1.113629000 | 4.058137000  | -0.837529000 |
| H | 0.020826000  | 5.949059000  | 2.353013000  |
| H | -2.323684000 | 6.125930000  | 1.579137000  |
| H | -3.044798000 | 4.943749000  | -0.492330000 |
| H | -1.410796000 | 3.557935000  | -1.756299000 |



H 0.884249000 2.814427000 -2.139231000

H 2.123704000 3.723616000 1.981071000

**Imaginary frequency  $i514.3$**

**$\mathbf{1}^{-1}\text{Int}_{(t,t)}$**

Ni 2.005377000 -2.159163000 -0.457252000

N 3.486081000 -3.699275000 -0.845445000

N 1.014934000 -3.821324000 0.612459000

N 2.366487000 -1.390336000 1.502830000

C 3.374201000 -4.698516000 0.240288000

H 3.874346000 -4.289636000 1.120570000

H 3.896742000 -5.632291000 -0.017569000

C 1.903029000 -5.021953000 0.542590000

H 1.511473000 -5.672184000 -0.242948000

H 1.846116000 -5.598294000 1.475969000

C 0.858463000 -3.288550000 1.996748000

H 0.667448000 -4.108282000 2.705264000

H -0.025076000 -2.645148000 1.982838000

C 2.073322000 -2.484135000 2.463182000

H 1.878080000 -2.081940000 3.467552000

H 2.957039000 -3.120819000 2.546909000

C 3.122047000 -4.298031000 -2.154898000

H 3.182105000 -3.545065000 -2.942363000

H 3.794597000 -5.130479000 -2.406065000

C -0.328581000 -4.156837000 0.071679000

H -0.785349000 -4.981360000 0.639342000

H -0.231354000 -4.459999000 -0.973527000

H -0.962392000 -3.268689000 0.131334000

C 1.445722000 -0.244856000 1.736178000

N 3.668634000 -0.824668000 -1.016048000

C 4.821850000 -3.059341000 -0.922797000

H 5.211296000 -2.951516000 0.091596000

H 5.535902000 -3.691158000 -1.470572000

|    |              |              |              |
|----|--------------|--------------|--------------|
| C  | 4.719479000  | -1.696758000 | -1.611660000 |
| H  | 4.464148000  | -1.838715000 | -2.665020000 |
| H  | 5.698585000  | -1.197682000 | -1.587895000 |
| C  | 4.123040000  | -0.158285000 | 0.246276000  |
| H  | 5.204168000  | 0.026692000  | 0.216270000  |
| H  | 3.654661000  | 0.825932000  | 0.289918000  |
| C  | 3.779055000  | -0.941302000 | 1.520798000  |
| H  | 3.982949000  | -0.296854000 | 2.388455000  |
| H  | 4.411648000  | -1.825933000 | 1.624618000  |
| H  | 2.095116000  | -4.665366000 | -2.131420000 |
| C  | 3.260021000  | 0.203350000  | -2.007689000 |
| H  | 4.095552000  | 0.868571000  | -2.264771000 |
| H  | 2.896714000  | -0.290386000 | -2.911210000 |
| H  | 2.444939000  | 0.797851000  | -1.591526000 |
| H  | 1.595354000  | 0.154272000  | 2.749779000  |
| H  | 1.647401000  | 0.549333000  | 1.017227000  |
| H  | 0.406099000  | -0.552570000 | 1.606384000  |
| Ni | -3.231781000 | -0.245343000 | 0.093971000  |
| N  | -4.352163000 | 1.488561000  | 0.746187000  |
| N  | -4.528587000 | -1.265582000 | 1.608228000  |
| N  | -4.466005000 | -1.293904000 | -1.306273000 |
| C  | -5.572176000 | 1.026938000  | 1.451138000  |
| H  | -6.329793000 | 0.791081000  | 0.700892000  |
| H  | -5.991700000 | 1.825414000  | 2.081094000  |
| C  | -5.273116000 | -0.194407000 | 2.326166000  |
| H  | -4.659009000 | 0.112440000  | 3.176597000  |
| H  | -6.214620000 | -0.579668000 | 2.743707000  |
| C  | -5.421926000 | -2.165015000 | 0.822613000  |
| H  | -6.373994000 | -2.326014000 | 1.348406000  |
| H  | -4.931303000 | -3.139634000 | 0.767526000  |
| C  | -5.715260000 | -1.667123000 | -0.599405000 |
| H  | -6.260373000 | -2.452188000 | -1.144410000 |
| H  | -6.365843000 | -0.790744000 | -0.577973000 |

|   |              |              |              |
|---|--------------|--------------|--------------|
| C | -3.456001000 | 2.216480000  | 1.679097000  |
| H | -2.541801000 | 2.521857000  | 1.167652000  |
| H | -3.172159000 | 1.567085000  | 2.509203000  |
| C | -3.741206000 | -2.065546000 | 2.577016000  |
| H | -4.391286000 | -2.599628000 | 3.284696000  |
| H | -3.072859000 | -1.403383000 | 3.130391000  |
| H | -3.122131000 | -2.776063000 | 2.029295000  |
| C | -3.725104000 | -2.508318000 | -1.732293000 |
| H | -4.310156000 | -3.076328000 | -2.469645000 |
| H | -3.518891000 | -3.141316000 | -0.869539000 |
| H | -2.764180000 | -2.229818000 | -2.165877000 |
| N | -2.803881000 | 1.083272000  | -1.659913000 |
| C | -4.656635000 | 2.317978000  | -0.442726000 |
| H | -5.518721000 | 1.875500000  | -0.945313000 |
| H | -4.950366000 | 3.337895000  | -0.151563000 |
| C | -3.451796000 | 2.400516000  | -1.387480000 |
| H | -2.693230000 | 3.054769000  | -0.951899000 |
| H | -3.766797000 | 2.877948000  | -2.326384000 |
| C | -3.412894000 | 0.371437000  | -2.818872000 |
| H | -3.627259000 | 1.073162000  | -3.638227000 |
| H | -2.663084000 | -0.328837000 | -3.194594000 |
| C | -4.691253000 | -0.396027000 | -2.466686000 |
| H | -5.020840000 | -0.965696000 | -3.347927000 |
| H | -5.503370000 | 0.289867000  | -2.217161000 |
| H | -3.954010000 | 3.111110000  | 2.080257000  |
| C | -1.356517000 | 1.294514000  | -1.922632000 |
| H | -1.200946000 | 1.912510000  | -2.818666000 |
| H | -0.907954000 | 1.803323000  | -1.066515000 |
| H | -0.859739000 | 0.330274000  | -2.048564000 |
| C | 4.289714000  | 3.167768000  | 2.107926000  |
| C | 5.609603000  | 2.949750000  | 1.738875000  |
| C | 6.013689000  | 3.188858000  | 0.416558000  |
| C | 5.083143000  | 3.646847000  | -0.520991000 |

|   |              |              |              |
|---|--------------|--------------|--------------|
| H | 3.977834000  | 3.013399000  | 3.138487000  |
| H | 6.333566000  | 2.619189000  | 2.478612000  |
| H | 7.050031000  | 3.043161000  | 0.126001000  |
| H | 5.407806000  | 3.853717000  | -1.539001000 |
| C | 3.751746000  | 3.878848000  | -0.170689000 |
| C | 3.333636000  | 3.639530000  | 1.169906000  |
| C | 1.985989000  | 3.901948000  | 1.555682000  |
| C | 2.775089000  | 4.409157000  | -1.201446000 |
| H | 1.699093000  | 3.740742000  | 2.592106000  |
| H | 2.716479000  | 3.702172000  | -2.045275000 |
| C | 1.021324000  | 4.440579000  | 0.655034000  |
| C | 1.375062000  | 4.701099000  | -0.699773000 |
| C | 0.426382000  | 5.256766000  | -1.558849000 |
| C | -0.860685000 | 5.573276000  | -1.115112000 |
| C | -1.215514000 | 5.325687000  | 0.220161000  |
| C | -0.291374000 | 4.761520000  | 1.089069000  |
| H | 0.704427000  | 5.471415000  | -2.588688000 |
| H | -1.569875000 | 6.037243000  | -1.794528000 |
| H | -2.200111000 | 5.609224000  | 0.583668000  |
| H | -0.549646000 | 4.598004000  | 2.133083000  |
| H | -0.919506000 | -0.995249000 | -0.132745000 |
| H | 3.190800000  | 5.326528000  | -1.644196000 |
| O | -1.626131000 | -1.102874000 | 0.533409000  |
| O | 0.586707000  | -1.453485000 | -1.323699000 |

$2^{-1}\text{Int}_{(t,t)}$

|    |             |              |              |
|----|-------------|--------------|--------------|
| Ni | 2.581116000 | -1.837042000 | 0.019332000  |
| N  | 4.277143000 | -2.252226000 | -1.207707000 |
| N  | 1.599029000 | -3.396470000 | -1.264205000 |
| N  | 2.474742000 | -3.380548000 | 1.499172000  |
| C  | 4.058450000 | -3.570362000 | -1.854693000 |
| H  | 4.327356000 | -4.348838000 | -1.138106000 |
| H  | 4.722784000 | -3.696489000 | -2.722153000 |

|   |              |              |              |
|---|--------------|--------------|--------------|
| C | 2.606376000  | -3.725586000 | -2.314408000 |
| H | 2.423354000  | -3.052796000 | -3.155222000 |
| H | 2.454417000  | -4.747105000 | -2.691980000 |
| C | 1.302766000  | -4.544746000 | -0.358262000 |
| H | 1.279148000  | -5.488427000 | -0.922264000 |
| H | 0.295815000  | -4.390533000 | 0.035841000  |
| C | 2.288845000  | -4.678336000 | 0.804049000  |
| H | 1.920443000  | -5.446944000 | 1.499270000  |
| H | 3.265806000  | -5.015566000 | 0.452331000  |
| C | 4.342119000  | -1.173096000 | -2.229027000 |
| H | 4.450753000  | -0.201737000 | -1.745479000 |
| H | 5.189826000  | -1.339800000 | -2.908780000 |
| C | 0.338239000  | -2.969200000 | -1.924711000 |
| H | -0.067466000 | -3.774471000 | -2.554643000 |
| H | 0.537466000  | -2.092745000 | -2.544082000 |
| H | -0.402251000 | -2.700698000 | -1.167510000 |
| C | 1.289357000  | -3.068350000 | 2.342584000  |
| N | 4.151021000  | -1.010167000 | 1.421250000  |
| C | 5.488661000  | -2.231570000 | -0.351272000 |
| H | 5.561247000  | -3.195531000 | 0.155676000  |
| H | 6.398617000  | -2.125985000 | -0.960226000 |
| C | 5.433380000  | -1.083185000 | 0.660049000  |
| H | 5.550426000  | -0.131290000 | 0.137055000  |
| H | 6.287461000  | -1.169403000 | 1.347550000  |
| C | 4.133844000  | -1.904787000 | 2.615043000  |
| H | 5.115325000  | -1.909050000 | 3.110577000  |
| H | 3.428161000  | -1.473986000 | 3.329299000  |
| C | 3.717557000  | -3.345277000 | 2.307325000  |
| H | 3.587096000  | -3.888356000 | 3.255096000  |
| H | 4.498714000  | -3.868915000 | 1.752353000  |
| H | 3.415173000  | -1.144256000 | -2.801698000 |
| C | 3.947751000  | 0.388958000  | 1.876623000  |
| H | 4.737278000  | 0.699220000  | 2.575365000  |

|    |              |              |              |
|----|--------------|--------------|--------------|
| H  | 3.959447000  | 1.063249000  | 1.019468000  |
| H  | 2.978758000  | 0.469390000  | 2.373537000  |
| H  | 1.172980000  | -3.820641000 | 3.135577000  |
| H  | 1.404568000  | -2.083027000 | 2.795890000  |
| H  | 0.383546000  | -3.043232000 | 1.734867000  |
| H  | 1.791315000  | 0.939831000  | 0.139065000  |
| Ni | -4.000326000 | -0.585602000 | 0.236840000  |
| N  | -3.690646000 | 0.737913000  | -1.417276000 |
| N  | -3.005345000 | 1.043723000  | 1.394951000  |
| N  | -5.743841000 | 0.110454000  | 1.286714000  |
| C  | -3.394454000 | 2.087379000  | -0.873040000 |
| H  | -4.342668000 | 2.574643000  | -0.635853000 |
| H  | -2.893606000 | 2.715305000  | -1.623491000 |
| C  | -2.496658000 | 1.992967000  | 0.362279000  |
| H  | -1.507264000 | 1.639853000  | 0.062605000  |
| H  | -2.357505000 | 2.997919000  | 0.786069000  |
| C  | -4.053037000 | 1.641789000  | 2.273764000  |
| H  | -3.841864000 | 2.704231000  | 2.461043000  |
| H  | -3.989552000 | 1.138876000  | 3.241240000  |
| C  | -5.478235000 | 1.500099000  | 1.728845000  |
| H  | -6.189818000 | 1.809832000  | 2.508982000  |
| H  | -5.639839000 | 2.162747000  | 0.876061000  |
| C  | -2.523376000 | 0.221263000  | -2.179203000 |
| H  | -2.699367000 | -0.814194000 | -2.472262000 |
| H  | -1.625762000 | 0.238036000  | -1.560281000 |
| C  | -1.866998000 | 0.590901000  | 2.235417000  |
| H  | -1.427067000 | 1.432781000  | 2.790322000  |
| H  | -1.102880000 | 0.142508000  | 1.597505000  |
| H  | -2.218111000 | -0.162312000 | 2.943829000  |
| C  | -5.917779000 | -0.789229000 | 2.458056000  |
| H  | -6.777382000 | -0.471301000 | 3.064918000  |
| H  | -5.018769000 | -0.785506000 | 3.074573000  |
| H  | -6.072903000 | -1.815401000 | 2.123983000  |

|   |              |              |              |
|---|--------------|--------------|--------------|
| N | -5.543058000 | -1.480275000 | -1.130033000 |
| C | -4.914220000 | 0.704846000  | -2.252960000 |
| H | -5.664381000 | 1.342739000  | -1.781623000 |
| H | -4.722664000 | 1.126457000  | -3.251116000 |
| C | -5.433467000 | -0.728673000 | -2.415027000 |
| H | -4.747865000 | -1.285795000 | -3.057385000 |
| H | -6.400675000 | -0.706226000 | -2.937018000 |
| C | -6.853368000 | -1.273447000 | -0.450358000 |
| H | -7.675553000 | -1.273414000 | -1.180531000 |
| H | -7.016728000 | -2.134120000 | 0.202487000  |
| C | -6.913918000 | 0.010731000  | 0.379794000  |
| H | -7.855706000 | 0.027005000  | 0.947546000  |
| H | -6.921730000 | 0.891639000  | -0.265219000 |
| H | -2.356022000 | 0.831885000  | -3.078350000 |
| C | -5.356723000 | -2.931028000 | -1.391393000 |
| H | -6.138022000 | -3.323286000 | -2.057756000 |
| H | -4.378662000 | -3.093301000 | -1.848188000 |
| H | -5.383403000 | -3.475632000 | -0.445748000 |
| C | 4.666966000  | 2.990888000  | -1.554808000 |
| C | 5.885110000  | 2.833559000  | -0.908172000 |
| C | 6.055566000  | 3.335178000  | 0.391897000  |
| C | 4.998503000  | 3.994432000  | 1.025941000  |
| H | 4.536265000  | 2.632937000  | -2.573533000 |
| H | 6.715356000  | 2.353615000  | -1.419873000 |
| H | 7.012361000  | 3.235249000  | 0.896123000  |
| H | 5.143809000  | 4.399155000  | 2.025472000  |
| C | 3.767570000  | 4.171029000  | 0.391666000  |
| C | 3.584838000  | 3.662058000  | -0.926062000 |
| C | 2.342155000  | 3.847680000  | -1.596664000 |
| C | 2.657193000  | 4.935904000  | 1.081997000  |
| H | 3.020179000  | 5.951653000  | 1.304451000  |
| C | 1.239841000  | 4.522526000  | -1.000018000 |
| C | 1.353717000  | 5.047417000  | 0.318767000  |

|   |              |              |              |
|---|--------------|--------------|--------------|
| C | 0.261377000  | 5.701687000  | 0.888632000  |
| C | -0.934894000 | 5.865337000  | 0.184448000  |
| C | -1.049800000 | 5.363750000  | -1.121883000 |
| C | 0.018844000  | 4.697105000  | -1.702333000 |
| H | 0.352148000  | 6.112456000  | 1.892033000  |
| H | -1.760499000 | 6.406505000  | 0.637924000  |
| H | -1.964329000 | 5.522850000  | -1.687628000 |
| H | -0.055349000 | 4.320595000  | -2.719861000 |
| H | 2.235277000  | 3.469617000  | -2.610205000 |
| H | 2.465651000  | 4.491803000  | 2.070946000  |
| S | 1.125990000  | -0.107690000 | -0.389184000 |
| S | -2.679158000 | -2.371732000 | 0.724868000  |

**3-<sup>5</sup>Int<sub>(t,t)</sub>**

|    |             |              |              |
|----|-------------|--------------|--------------|
| Ni | 2.946651000 | -1.662188000 | 0.020857000  |
| N  | 4.726585000 | -1.894503000 | -1.145453000 |
| N  | 2.084678000 | -3.033861000 | -1.536658000 |
| N  | 2.773172000 | -3.398924000 | 1.266110000  |
| C  | 4.592744000 | -3.154498000 | -1.916396000 |
| H  | 4.823677000 | -3.985395000 | -1.247042000 |
| H  | 5.327444000 | -3.195253000 | -2.734552000 |
| C  | 3.187685000 | -3.297444000 | -2.508688000 |
| H  | 3.071682000 | -2.584256000 | -3.327663000 |
| H  | 3.083389000 | -4.298347000 | -2.951120000 |
| C  | 1.663946000 | -4.251120000 | -0.786008000 |
| H  | 1.606433000 | -5.120367000 | -1.457554000 |
| H  | 0.650805000 | -4.066745000 | -0.420056000 |
| C  | 2.579021000 | -4.584693000 | 0.391992000  |
| H  | 2.144957000 | -5.420918000 | 0.958845000  |
| H  | 3.559026000 | -4.917133000 | 0.044238000  |
| C  | 4.803164000 | -0.724859000 | -2.061704000 |
| H  | 4.872082000 | 0.201495000  | -1.490169000 |
| H  | 5.678973000 | -0.812432000 | -2.720599000 |



|    |              |              |              |
|----|--------------|--------------|--------------|
| C  | 0.908912000  | -2.508244000 | -2.279053000 |
| H  | 0.560299000  | -3.234565000 | -3.027823000 |
| H  | 1.182495000  | -1.578015000 | -2.780107000 |
| H  | 0.096026000  | -2.303790000 | -1.579161000 |
| C  | 1.581801000  | -3.200013000 | 2.134416000  |
| N  | 4.417023000  | -1.025237000 | 1.618914000  |
| C  | 5.895364000  | -1.910728000 | -0.230206000 |
| H  | 6.009677000  | -2.922326000 | 0.163573000  |
| H  | 6.822139000  | -1.679551000 | -0.775278000 |
| C  | 5.719735000  | -0.900271000 | 0.903855000  |
| H  | 5.764855000  | 0.113465000  | 0.498145000  |
| H  | 6.559834000  | -0.997217000 | 1.607519000  |
| C  | 4.414261000  | -2.123232000 | 2.633312000  |
| H  | 5.399083000  | -2.206111000 | 3.114859000  |
| H  | 3.711625000  | -1.833451000 | 3.417825000  |
| C  | 4.007885000  | -3.492609000 | 2.081524000  |
| H  | 3.871938000  | -4.186870000 | 2.924233000  |
| H  | 4.795521000  | -3.912732000 | 1.453124000  |
| H  | 3.898748000  | -0.661576000 | -2.666877000 |
| C  | 4.136141000  | 0.255361000  | 2.316901000  |
| H  | 4.881701000  | 0.449410000  | 3.101453000  |
| H  | 4.155312000  | 1.080352000  | 1.603345000  |
| H  | 3.143849000  | 0.209846000  | 2.769857000  |
| H  | 1.469573000  | -4.044742000 | 2.828995000  |
| H  | 1.683036000  | -2.275370000 | 2.703611000  |
| H  | 0.680094000  | -3.111933000 | 1.526705000  |
| Se | 1.334778000  | 0.152911000  | -0.191416000 |
| H  | 2.029846000  | 1.214531000  | 0.585036000  |
| Se | -2.404948000 | -2.487384000 | 0.330291000  |
| Ni | -3.963629000 | -0.678889000 | 0.137296000  |
| N  | -3.743368000 | 0.960492000  | -1.232640000 |
| N  | -3.147229000 | 0.794100000  | 1.618715000  |
| N  | -5.787068000 | -0.341408000 | 1.251468000  |

|   |              |              |              |
|---|--------------|--------------|--------------|
| C | -3.538882000 | 2.201019000  | -0.439354000 |
| H | -4.516684000 | 2.584085000  | -0.138914000 |
| H | -3.063346000 | 2.984491000  | -1.045756000 |
| C | -2.658516000 | 1.925422000  | 0.779385000  |
| H | -1.651135000 | 1.663720000  | 0.446162000  |
| H | -2.566274000 | 2.845766000  | 1.374509000  |
| C | -4.277554000 | 1.178317000  | 2.515799000  |
| H | -4.171209000 | 2.221269000  | 2.846488000  |
| H | -4.203066000 | 0.561566000  | 3.414260000  |
| C | -5.665110000 | 0.987557000  | 1.893945000  |
| H | -6.425815000 | 1.121230000  | 2.678224000  |
| H | -5.859873000 | 1.745408000  | 1.132951000  |
| C | -2.551997000 | 0.701222000  | -2.083331000 |
| H | -2.655878000 | -0.256710000 | -2.593429000 |
| H | -1.651916000 | 0.650069000  | -1.469571000 |
| C | -2.020382000 | 0.298059000  | 2.449854000  |
| H | -1.685751000 | 1.067460000  | 3.161586000  |
| H | -1.185772000 | 0.024011000  | 1.802082000  |
| H | -2.339088000 | -0.587960000 | 3.002917000  |
| C | -5.885340000 | -1.413687000 | 2.275942000  |
| H | -6.767769000 | -1.258853000 | 2.913375000  |
| H | -4.988633000 | -1.427123000 | 2.895776000  |
| H | -5.957387000 | -2.388682000 | 1.793383000  |
| N | -5.396842000 | -1.426118000 | -1.421437000 |
| C | -4.975054000 | 0.999728000  | -2.055748000 |
| H | -5.763841000 | 1.464328000  | -1.460651000 |
| H | -4.836471000 | 1.632573000  | -2.945519000 |
| C | -5.385972000 | -0.405081000 | -2.512858000 |
| H | -4.682012000 | -0.752579000 | -3.272140000 |
| H | -6.368586000 | -0.350863000 | -3.002728000 |
| C | -6.712652000 | -1.517880000 | -0.727935000 |
| H | -7.537519000 | -1.501845000 | -1.455477000 |
| H | -6.747027000 | -2.492904000 | -0.235859000 |

|   |              |              |              |
|---|--------------|--------------|--------------|
| C | -6.932456000 | -0.418376000 | 0.310907000  |
| H | -7.871295000 | -0.615323000 | 0.848756000  |
| H | -7.047499000 | 0.554058000  | -0.171658000 |
| H | -2.436772000 | 1.500057000  | -2.830365000 |
| C | -5.071443000 | -2.756825000 | -1.997893000 |
| H | -5.816322000 | -3.060926000 | -2.747093000 |
| H | -4.086061000 | -2.719054000 | -2.465815000 |
| H | -5.041581000 | -3.501219000 | -1.200175000 |
| C | 4.286682000  | 3.657618000  | -1.663621000 |
| C | 5.481078000  | 3.373956000  | -1.017451000 |
| C | 5.596062000  | 3.590524000  | 0.365163000  |
| C | 4.508182000  | 4.099827000  | 1.082279000  |
| H | 4.194582000  | 3.507309000  | -2.736496000 |
| H | 6.335014000  | 3.015008000  | -1.586064000 |
| H | 6.536998000  | 3.397588000  | 0.873077000  |
| H | 4.612502000  | 4.293139000  | 2.148124000  |
| C | 3.302158000  | 4.404027000  | 0.449787000  |
| C | 3.174198000  | 4.175265000  | -0.950413000 |
| C | 1.946911000  | 4.467423000  | -1.609831000 |
| C | 2.168120000  | 5.037461000  | 1.228090000  |
| H | 2.494958000  | 6.038038000  | 1.556423000  |
| C | 0.796544000  | 4.942267000  | -0.918865000 |
| C | 0.859298000  | 5.191033000  | 0.482366000  |
| C | -0.282735000 | 5.638058000  | 1.147173000  |
| C | -1.479853000 | 5.863867000  | 0.460903000  |
| C | -1.544823000 | 5.638004000  | -0.923406000 |
| C | -0.425516000 | 5.178331000  | -1.601314000 |
| H | -0.231037000 | 5.840338000  | 2.215050000  |
| H | -2.346303000 | 6.244836000  | 0.994316000  |
| H | -2.461707000 | 5.849260000  | -1.467650000 |
| H | -0.463322000 | 5.014181000  | -2.675553000 |
| H | 1.880227000  | 4.303820000  | -2.682409000 |
| H | 2.001392000  | 4.482180000  | 2.162238000  |

$4^{-1}\text{Int}_{(t,t)}$ 

|    |              |              |              |
|----|--------------|--------------|--------------|
| Ni | -3.326904000 | -1.431810000 | -0.062660000 |
| N  | -5.355574000 | -0.854360000 | -0.438424000 |
| N  | -3.741554000 | -0.557545000 | 1.982179000  |
| N  | -3.374749000 | -3.288592000 | 1.030741000  |
| C  | -6.017059000 | -0.645651000 | 0.875111000  |
| H  | -6.318480000 | -1.620045000 | 1.262761000  |
| H  | -6.937406000 | -0.054622000 | 0.758962000  |
| C  | -5.089904000 | 0.069936000  | 1.858399000  |
| H  | -4.937394000 | 1.100838000  | 1.529685000  |
| H  | -5.582433000 | 0.122716000  | 2.840774000  |
| C  | -3.724321000 | -1.716180000 | 2.924976000  |
| H  | -4.376609000 | -1.520017000 | 3.788323000  |
| H  | -2.707331000 | -1.794717000 | 3.315959000  |
| C  | -4.117646000 | -3.051857000 | 2.291500000  |
| H  | -3.926975000 | -3.856536000 | 3.017668000  |
| H  | -5.185541000 | -3.081047000 | 2.067690000  |
| C  | -5.362310000 | 0.409790000  | -1.222904000 |
| H  | -4.798163000 | 0.281912000  | -2.147032000 |
| H  | -6.394298000 | 0.702338000  | -1.464665000 |
| C  | -2.793299000 | 0.464266000  | 2.496676000  |
| H  | -3.074696000 | 0.786408000  | 3.509875000  |
| H  | -2.792439000 | 1.335758000  | 1.840746000  |
| H  | -1.785703000 | 0.044896000  | 2.523347000  |
| C  | -1.967178000 | -3.670297000 | 1.318704000  |
| N  | -3.685406000 | -2.810696000 | -1.830575000 |
| C  | -5.990925000 | -1.948445000 | -1.215382000 |
| H  | -6.264231000 | -2.744217000 | -0.520288000 |
| H  | -6.925412000 | -1.604449000 | -1.683215000 |
| C  | -5.058271000 | -2.472091000 | -2.309106000 |
| H  | -4.948650000 | -1.706162000 | -3.080391000 |
| H  | -5.524608000 | -3.341197000 | -2.795503000 |

|    |              |              |              |
|----|--------------|--------------|--------------|
| C  | -3.583869000 | -4.192626000 | -1.277840000 |
| H  | -4.160862000 | -4.899521000 | -1.892133000 |
| H  | -2.536341000 | -4.492411000 | -1.358897000 |
| C  | -4.029136000 | -4.312822000 | 0.180027000  |
| H  | -3.799307000 | -5.327063000 | 0.539046000  |
| H  | -5.109946000 | -4.188493000 | 0.267120000  |
| H  | -4.888957000 | 1.213007000  | -0.658011000 |
| C  | -2.748557000 | -2.698156000 | -2.978208000 |
| H  | -3.012618000 | -3.401980000 | -3.780428000 |
| H  | -2.775103000 | -1.682000000 | -3.375975000 |
| H  | -1.731577000 | -2.914050000 | -2.643650000 |
| H  | -1.932257000 | -4.602740000 | 1.900787000  |
| H  | -1.410855000 | -3.805679000 | 0.390774000  |
| H  | -1.463687000 | -2.878325000 | 1.873463000  |
| Te | -1.216888000 | -0.180796000 | -0.975908000 |
| Te | 1.606396000  | -1.547312000 | 0.541356000  |
| Ni | 3.979977000  | -0.618970000 | 0.013343000  |
| N  | 5.024533000  | 1.006279000  | 0.988939000  |
| N  | 3.793281000  | 0.894718000  | -1.634071000 |
| N  | 5.410979000  | -1.517294000 | -1.346775000 |
| C  | 5.511268000  | 1.920848000  | -0.071180000 |
| H  | 6.415472000  | 1.485328000  | -0.500576000 |
| H  | 5.801199000  | 2.895084000  | 0.351099000  |
| C  | 4.446130000  | 2.147525000  | -1.147512000 |
| H  | 3.659128000  | 2.790293000  | -0.746875000 |
| H  | 4.896808000  | 2.698682000  | -1.985613000 |
| C  | 4.502064000  | 0.284508000  | -2.792405000 |
| H  | 4.788246000  | 1.056164000  | -3.522599000 |
| H  | 3.786952000  | -0.372817000 | -3.293549000 |
| C  | 5.739130000  | -0.518797000 | -2.395725000 |
| H  | 6.152574000  | -1.009482000 | -3.289033000 |
| H  | 6.520396000  | 0.139520000  | -2.012225000 |
| C  | 4.048323000  | 1.700320000  | 1.868879000  |

|   |              |              |              |
|---|--------------|--------------|--------------|
| H | 3.641063000  | 1.000538000  | 2.599096000  |
| H | 3.212923000  | 2.083763000  | 1.282763000  |
| C | 2.403464000  | 1.213346000  | -2.047229000 |
| H | 2.391542000  | 1.939845000  | -2.872659000 |
| H | 1.859028000  | 1.629724000  | -1.199292000 |
| H | 1.896932000  | 0.299635000  | -2.358997000 |
| C | 4.770285000  | -2.709765000 | -1.960049000 |
| H | 5.471428000  | -3.216337000 | -2.639130000 |
| H | 3.880525000  | -2.410330000 | -2.514308000 |
| H | 4.446993000  | -3.405719000 | -1.186118000 |
| N | 5.163075000  | -1.870769000 | 1.541075000  |
| C | 6.136396000  | 0.448357000  | 1.798793000  |
| H | 6.997769000  | 0.295860000  | 1.146012000  |
| H | 6.454151000  | 1.164104000  | 2.571264000  |
| C | 5.729065000  | -0.859049000 | 2.475178000  |
| H | 4.959682000  | -0.652921000 | 3.223492000  |
| H | 6.595075000  | -1.270313000 | 3.015681000  |
| C | 6.208854000  | -2.592080000 | 0.757918000  |
| H | 7.113079000  | -2.744004000 | 1.365486000  |
| H | 5.816024000  | -3.587090000 | 0.538171000  |
| C | 6.601957000  | -1.913632000 | -0.557922000 |
| H | 7.240783000  | -2.604103000 | -1.129606000 |
| H | 7.197339000  | -1.017328000 | -0.375752000 |
| H | 4.532990000  | 2.536442000  | 2.394093000  |
| C | 4.411424000  | -2.868955000 | 2.345834000  |
| H | 5.076706000  | -3.398126000 | 3.043656000  |
| H | 3.626718000  | -2.365546000 | 2.913172000  |
| H | 3.938931000  | -3.595104000 | 1.682041000  |
| C | -3.885126000 | 4.133790000  | 1.633788000  |
| C | -5.131579000 | 4.132894000  | 1.021866000  |
| C | -5.225855000 | 4.271521000  | -0.371526000 |
| C | -4.061952000 | 4.407645000  | -1.135324000 |
| H | -3.808112000 | 4.065660000  | 2.716618000  |

|   |              |             |              |
|---|--------------|-------------|--------------|
| H | -6.033017000 | 4.061658000 | 1.624964000  |
| H | -6.198532000 | 4.304078000 | -0.854092000 |
| H | -4.140808000 | 4.534184000 | -2.213173000 |
| C | -2.799785000 | 4.409733000 | -0.540903000 |
| C | -2.694958000 | 4.276122000 | 0.873043000  |
| C | -1.416075000 | 4.331445000 | 1.501966000  |
| C | -1.552806000 | 4.534725000 | -1.392010000 |
| H | -1.122522000 | 1.018731000 | 0.167281000  |
| H | -1.697192000 | 5.326149000 | -2.140174000 |
| C | -0.222088000 | 4.628283000 | 0.781092000  |
| C | -0.264610000 | 4.782430000 | -0.634187000 |
| C | 0.895599000  | 5.148627000 | -1.315898000 |
| C | 2.100733000  | 5.359924000 | -0.637820000 |
| C | 2.154238000  | 5.193935000 | 0.754710000  |
| C | 1.011107000  | 4.829812000 | 1.452459000  |
| H | 0.854430000  | 5.293218000 | -2.393597000 |
| H | 2.981177000  | 5.684335000 | -1.185821000 |
| H | 3.079188000  | 5.386629000 | 1.292263000  |
| H | 1.038682000  | 4.732332000 | 2.535153000  |
| H | -1.361944000 | 4.241435000 | 2.584285000  |
| H | -1.438844000 | 3.608237000 | -1.981007000 |

$3^{-5}\text{TS2}_{(t,t)}$

|    |              |              |              |
|----|--------------|--------------|--------------|
| Ni | 0.012461000  | -1.716109000 | -0.696894000 |
| N  | 1.233484000  | -3.403731000 | 0.197873000  |
| N  | 1.191422000  | -2.321726000 | -2.529423000 |
| N  | -1.608143000 | -2.905633000 | -1.861516000 |
| C  | 1.949313000  | -4.090817000 | -0.907945000 |
| H  | 1.313942000  | -4.879222000 | -1.313363000 |
| H  | 2.855259000  | -4.588529000 | -0.534392000 |
| C  | 2.344503000  | -3.093775000 | -1.991606000 |
| H  | 3.050118000  | -2.368053000 | -1.580010000 |
| H  | 2.861919000  | -3.623828000 | -2.805875000 |

|   |              |              |              |
|---|--------------|--------------|--------------|
| C | 0.317620000  | -3.148110000 | -3.415407000 |
| H | 0.916517000  | -3.897138000 | -3.953690000 |
| H | -0.095751000 | -2.481633000 | -4.175968000 |
| C | -0.837266000 | -3.850307000 | -2.697999000 |
| H | -1.479912000 | -4.322754000 | -3.457807000 |
| H | -0.473536000 | -4.655336000 | -2.060093000 |
| C | 2.227578000  | -2.911228000 | 1.181060000  |
| H | 1.763361000  | -2.244246000 | 1.905755000  |
| H | 2.688711000  | -3.761164000 | 1.705468000  |
| C | 1.732631000  | -1.190474000 | -3.315987000 |
| H | 2.342874000  | -1.546552000 | -4.159268000 |
| H | 2.340425000  | -0.566421000 | -2.660460000 |
| H | 0.904473000  | -0.594673000 | -3.703095000 |
| C | -2.475649000 | -2.075238000 | -2.732931000 |
| N | -1.349498000 | -2.330530000 | 1.017957000  |
| C | 0.264897000  | -4.285643000 | 0.883291000  |
| H | -0.260916000 | -4.870917000 | 0.129883000  |
| H | 0.781653000  | -5.007164000 | 1.535566000  |
| C | -0.709250000 | -3.472636000 | 1.735867000  |
| H | -0.167523000 | -3.058886000 | 2.589333000  |
| H | -1.477004000 | -4.142285000 | 2.149411000  |
| C | -2.637494000 | -2.724720000 | 0.382675000  |
| H | -3.281879000 | -3.246315000 | 1.105049000  |
| H | -3.157712000 | -1.804145000 | 0.107219000  |
| C | -2.465785000 | -3.591588000 | -0.858403000 |
| H | -3.460952000 | -3.805057000 | -1.271030000 |
| H | -2.025199000 | -4.556616000 | -0.605394000 |
| H | 3.002194000  | -2.346149000 | 0.668039000  |
| C | -1.626835000 | -1.265343000 | 2.006776000  |
| H | -2.250000000 | -1.639383000 | 2.832654000  |
| H | -0.682174000 | -0.888423000 | 2.401142000  |
| H | -2.151952000 | -0.446369000 | 1.516350000  |
| H | -3.129901000 | -2.720867000 | -3.336995000 |



|    |              |              |              |
|----|--------------|--------------|--------------|
| H  | -3.098232000 | -1.418565000 | -2.125428000 |
| H  | -1.880118000 | -1.444952000 | -3.392532000 |
| Se | -1.017912000 | 0.672848000  | -1.404930000 |
| Se | 1.622433000  | 0.312911000  | 0.245144000  |
| Ni | 0.365561000  | 2.727385000  | -0.382711000 |
| N  | -1.247864000 | 4.295852000  | -0.936896000 |
| N  | 1.171622000  | 3.432752000  | -2.393224000 |
| N  | 2.055924000  | 4.074959000  | 0.311965000  |
| C  | -0.753778000 | 5.034690000  | -2.127784000 |
| H  | -0.132131000 | 5.870436000  | -1.803944000 |
| H  | -1.591100000 | 5.476755000  | -2.686258000 |
| C  | 0.021037000  | 4.105248000  | -3.055275000 |
| H  | -0.644040000 | 3.314766000  | -3.412467000 |
| H  | 0.362985000  | 4.669452000  | -3.936740000 |
| C  | 2.304724000  | 4.372007000  | -2.141320000 |
| H  | 2.351265000  | 5.138530000  | -2.928238000 |
| H  | 3.228708000  | 3.794893000  | -2.221203000 |
| C  | 2.266375000  | 5.057225000  | -0.773530000 |
| H  | 3.209465000  | 5.607934000  | -0.632138000 |
| H  | 1.466264000  | 5.794913000  | -0.723280000 |
| C  | -2.571777000 | 3.710370000  | -1.257101000 |
| H  | -2.937745000 | 3.099760000  | -0.432299000 |
| H  | -2.497069000 | 3.072928000  | -2.137800000 |
| C  | 1.647599000  | 2.351717000  | -3.285870000 |
| H  | 2.042593000  | 2.756200000  | -4.229578000 |
| H  | 0.816558000  | 1.681717000  | -3.507678000 |
| H  | 2.426580000  | 1.782813000  | -2.776658000 |
| C  | 3.306723000  | 3.317029000  | 0.541195000  |
| H  | 4.134473000  | 4.005975000  | 0.766915000  |
| H  | 3.555361000  | 2.720269000  | -0.335640000 |
| H  | 3.169539000  | 2.630224000  | 1.374778000  |
| N  | -0.413433000 | 3.262617000  | 1.677100000  |
| C  | -1.368436000 | 5.154226000  | 0.262171000  |

|   |              |              |              |
|---|--------------|--------------|--------------|
| H | -0.510488000 | 5.825992000  | 0.289604000  |
| H | -2.261814000 | 5.795710000  | 0.202264000  |
| C | -1.462712000 | 4.318391000  | 1.542402000  |
| H | -2.433270000 | 3.817479000  | 1.566567000  |
| H | -1.441637000 | 4.991934000  | 2.411613000  |
| C | 0.787415000  | 3.749997000  | 2.407283000  |
| H | 0.490867000  | 4.234194000  | 3.350471000  |
| H | 1.377683000  | 2.866361000  | 2.665751000  |
| C | 1.641363000  | 4.710581000  | 1.588877000  |
| H | 2.519785000  | 5.006399000  | 2.179921000  |
| H | 1.096413000  | 5.630387000  | 1.374089000  |
| H | -3.301031000 | 4.510671000  | -1.452348000 |
| C | -0.974484000 | 2.127721000  | 2.445286000  |
| H | -1.257020000 | 2.435843000  | 3.463026000  |
| H | -1.861261000 | 1.750597000  | 1.935036000  |
| H | -0.227784000 | 1.334872000  | 2.493336000  |
| C | -6.441310000 | -2.722595000 | -1.092921000 |
| C | -6.504859000 | -4.070125000 | -0.766403000 |
| C | -6.432614000 | -4.467473000 | 0.577281000  |
| C | -6.310487000 | -3.501476000 | 1.581250000  |
| H | -6.513401000 | -2.407595000 | -2.131481000 |
| H | -6.630415000 | -4.814008000 | -1.548385000 |
| H | -6.495460000 | -5.519191000 | 0.840783000  |
| H | -6.284019000 | -3.813490000 | 2.623517000  |
| C | -6.253477000 | -2.140974000 | 1.275679000  |
| C | -6.308728000 | -1.730054000 | -0.086945000 |
| C | -6.220028000 | -0.345489000 | -0.418269000 |
| C | -6.206683000 | -1.107941000 | 2.382721000  |
| H | -6.309201000 | -0.050076000 | -1.461082000 |
| H | -5.484241000 | -1.413420000 | 3.153182000  |
| C | -5.998947000 | 0.664672000  | 0.563821000  |
| C | -5.926092000 | 0.314396000  | 1.943205000  |
| C | -5.674256000 | 1.308378000  | 2.888685000  |

|   |              |              |              |
|---|--------------|--------------|--------------|
| C | -5.519291000 | 2.646886000  | 2.513680000  |
| C | -5.617400000 | 3.004342000  | 1.160392000  |
| C | -5.846061000 | 2.027801000  | 0.200040000  |
| H | -5.629716000 | 1.039383000  | 3.942114000  |
| H | -5.360503000 | 3.407768000  | 3.272599000  |
| H | -5.545457000 | 4.048409000  | 0.865967000  |
| H | -5.942406000 | 2.301978000  | -0.848250000 |
| H | -2.340558000 | 0.699903000  | -0.711499000 |
| H | -7.180708000 | -1.117483000 | 2.900044000  |
| C | 6.519246000  | -2.282018000 | -2.143470000 |
| C | 6.074392000  | -0.970885000 | -2.366339000 |
| C | 5.521684000  | -0.246580000 | -1.319929000 |
| C | 6.414084000  | -2.842636000 | -0.871096000 |
| H | 6.966220000  | -2.852317000 | -2.952414000 |
| H | 6.179782000  | -0.519260000 | -3.348616000 |
| H | 5.191589000  | 0.777131000  | -1.481999000 |
| H | 6.790846000  | -3.847846000 | -0.694937000 |
| C | 5.397324000  | -0.805475000 | -0.026938000 |
| C | 5.861709000  | -2.124654000 | 0.196117000  |
| C | 5.818875000  | -2.745457000 | 1.575019000  |
| C | 4.809702000  | -0.038767000 | 1.057975000  |
| H | 6.830539000  | -3.088723000 | 1.836553000  |
| H | 3.209288000  | 0.055419000  | 0.663719000  |
| C | 4.850663000  | -0.540912000 | 2.418977000  |
| C | 5.307223000  | -1.854526000 | 2.685427000  |
| C | 5.325295000  | -2.315583000 | 4.006023000  |
| C | 4.905239000  | -1.505803000 | 5.059968000  |
| C | 4.466870000  | -0.198707000 | 4.804090000  |
| C | 4.444044000  | 0.273597000  | 3.500604000  |
| H | 5.691910000  | -3.318462000 | 4.213426000  |
| H | 4.934994000  | -1.882089000 | 6.078132000  |
| H | 4.160709000  | 0.443864000  | 5.624345000  |
| H | 4.121149000  | 1.292267000  | 3.297940000  |

|   |             |              |             |
|---|-------------|--------------|-------------|
| H | 4.839240000 | 1.043366000  | 0.945574000 |
| H | 5.219490000 | -3.668963000 | 1.541789000 |

**Imaginary frequency  $i865.2$**

**$3^{-3}P_{(t,t)}$**

|    |              |              |              |
|----|--------------|--------------|--------------|
| Ni | 0.024057000  | 0.235007000  | -0.000383000 |
| Se | 0.754346000  | 2.531188000  | -0.001609000 |
| H  | -0.553758000 | 3.240463000  | -0.003022000 |
| N  | -2.241254000 | 0.245588000  | -0.000351000 |
| N  | -0.259555000 | -1.014781000 | -1.729851000 |
| N  | 2.068188000  | -0.716066000 | 0.000437000  |
| C  | -2.890172000 | 1.582481000  | -0.000565000 |
| H  | -3.986118000 | 1.494380000  | -0.000411000 |
| H  | -2.577406000 | 2.141056000  | 0.883230000  |
| C  | -2.639261000 | -0.475430000 | -1.243762000 |
| H  | -2.734802000 | 0.275219000  | -2.031559000 |
| H  | -3.632570000 | -0.933121000 | -1.126435000 |
| C  | -1.642548000 | -1.547674000 | -1.691519000 |
| H  | -1.658423000 | -2.402754000 | -1.012894000 |
| H  | -1.948078000 | -1.924030000 | -2.679399000 |
| C  | -0.063028000 | -0.156271000 | -2.927640000 |
| H  | -0.172892000 | -0.748467000 | -3.847580000 |
| H  | 0.925533000  | 0.302371000  | -2.904515000 |
| H  | -0.790113000 | 0.655949000  | -2.931789000 |
| C  | 0.763964000  | -2.086861000 | -1.685104000 |
| H  | 0.878006000  | -2.563734000 | -2.670241000 |
| H  | 0.412511000  | -2.861682000 | -1.000945000 |
| C  | 2.123203000  | -1.539869000 | -1.241142000 |
| H  | 2.827432000  | -2.376298000 | -1.122092000 |
| H  | 2.527712000  | -0.902663000 | -2.030762000 |
| C  | 3.215071000  | 0.230816000  | -0.001555000 |
| H  | 4.174316000  | -0.306083000 | -0.001388000 |
| N  | -0.259561000 | -1.011600000 | 1.731494000  |

|   |              |              |              |
|---|--------------|--------------|--------------|
| H | -2.577667000 | 2.140676000  | -0.884696000 |
| C | -2.639541000 | -0.475204000 | 1.243158000  |
| H | -2.736888000 | 0.275771000  | 2.030421000  |
| H | -3.632142000 | -0.934231000 | 1.125121000  |
| C | -1.641957000 | -1.545929000 | 1.692658000  |
| H | -1.656371000 | -2.401657000 | 1.014822000  |
| H | -1.947861000 | -1.921661000 | 2.680671000  |
| C | -0.065183000 | -0.150524000 | 2.927774000  |
| H | -0.176748000 | -0.740748000 | 3.848776000  |
| H | 0.923464000  | 0.307971000  | 2.905475000  |
| H | -0.792177000 | 0.661792000  | 2.928798000  |
| C | 0.765097000  | -2.082763000 | 1.690006000  |
| H | 0.879447000  | -2.556648000 | 2.676545000  |
| H | 0.414692000  | -2.860027000 | 1.008071000  |
| C | 2.123819000  | -1.535572000 | 1.244782000  |
| H | 2.829140000  | -2.371513000 | 1.128819000  |
| H | 2.527162000  | -0.895122000 | 2.032371000  |
| H | 3.160273000  | 0.868329000  | -0.885315000 |
| H | 3.161446000  | 0.870703000  | 0.880704000  |

## References-

1. S. Hikichi, M. Yoshizawa, Y. Sasakura, M. Akita and Y. Moro-oka, *J. Am. Chem. Soc.*, 1998, **120**, 10567-10568.
2. R. Schenker, B. S. Mandimutsira, C. G. Riordan and T. C. Brunold, *J. Am. Chem. Soc.*, 2002, **124**, 13842-13855.
3. M. T. Kieber-Emmons and C. G. Riordan, *Acc. Chem. Res.*, 2007, **40**, 618-625.
4. J. Cho, K. M. Van Heuvelen, G. P. Yap, T. C. Brunold and C. G. Riordan, *Inorg. Chem.*, 2008, **47**, 3931-3933.
5. S. A. Yao, V. Martin-Diaconescu, I. Infante, K. M. Lancaster, A. W. Götz, S. DeBeer and J. F. Berry, *J. Am. Chem. Soc.*, 2015, **137**, 4993-5011.
6. C. Mealli and S. Midollini, *Inorg. Chem.*, 1983, **22**, 2785-2786.
7. J. Wallick, C. G. Riordan and G. P. Yap, *J. Am. Chem. Soc.*, 2013, **135**, 14972-14974.
8. S. Yao, Y. Xiong, X. Zhang, M. Schlangen, H. Schwarz, C. Milsmann and M. Driess, *Angew. Chem.*, 2009, **121**, 4621-4624.
9. M. Di Vaira, M. Peruzzini and P. Stoppioni, *J. Chem. Soc., Chem. Commun.*, 1986, 374-375.
10. R. J. Pleus, H. Waden, W. Saak, D. Haase and S. Pohl, *J. Chem. Soc., Dalton Trans.*, 1999, 2601-2610.
11. C. Casewit, D. Coons, L. Wright, W. Miller and M. R. DuBois, *Organometallics*, 1986, **5**, 951-955.
12. L. Fohlmeister, K. R. Vignesh, F. Winter, B. Moubaraki, G. Rajaraman, R. Pöttgen, K. S. Murray and C. Jones, *Dalton Trans.*, 2015, **44**, 1700-1708.
13. V. M. Iluc, C. A. Laskowski, C. K. Brozek, N. D. Harrold and G. L. Hillhouse, *Inorg. Chem.*, 2010, **49**, 6817-6819.
14. S. Yao, C. Milsmann, E. Bill, K. Wieghardt and M. Driess, *J. Am. Chem. Soc.*, 2008, **130**, 13536-13537.
15. M. Inosako, A. Kunishita, M. Kubo, T. Ogura, H. Sugimoto and S. Itoh, *Dalton Trans.*, 2009, 9410-9417.
16. F. Olechnowicz, G. L. Hillhouse and R. F. Jordan, *Inorg. Chem.*, 2015, **54**, 2705-2712.
17. M. T. Kieber-Emmons, J. Annaraj, M. S. Seo, K. M. Van Heuvelen, T. Tosha, T. Kitagawa, T. C. Brunold, W. Nam and C. G. Riordan, *J. Am. Chem. Soc.*, 2006, **128**, 14230-14231.
